# Supplementary material for: Simultaneously improving the efficiencies of photo- and thermal isomerization of an oxindole-based light-driven molecular rotary motor by a structural redesign
Source: Royal Society of Chemistry journal article supplement (doi:10.1039/d3cp00559c), 2023-01-01
Supplement: d3cp00559c2.pdf [file d3cp00559c2.pdf]

## Supporting Information (SI) For:

### Simultaneously Improving the Efficiencies of Photo- and Thermal Isomerization of an Oxindole-Based Light-Driven Molecular Rotary Motor by a Structural Redesign

Jianzheng Ma<sup>1</sup>, Di Zhao<sup>1</sup>, Le Yu<sup>2</sup>, Chenwei Jiang<sup>1,\*</sup>, Zhenggang Lan<sup>3,\*</sup>,  
and Fuli Li<sup>1</sup>

<sup>1</sup>Ministry of Education Key Laboratory for Nonequilibrium Synthesis and Modulation of Condensed Matter, Shaanxi Province Key Laboratory of Quantum Information and Quantum Optoelectronic Devices, School of Physics, Xi'an Jiaotong University, Xi'an 710049, China

<sup>2</sup>Key Laboratory of Synthetic and Natural Functional Molecule Chemistry of Ministry of Education, College of Chemistry & Materials Science, Shaanxi Key Laboratory of Physico-Inorganic Chemistry, Northwest University, Xi'an, Shaanxi, 710127, China

<sup>3</sup>SCNU Environmental Research Institute, Guangdong Provincial Key Laboratory of Chemical Pollution and Environmental Safety & MOE Key Laboratory of Environmental Theoretical Chemistry, South China Normal University, Guangzhou 510006, China; School of Environment, South China Normal University, Guangzhou 510006, China

\*Corresponding authors. Email: [jiangcw@xjtu.edu.cn](mailto:jiangcw@xjtu.edu.cn) (C.J.);  
[zhenggang.lan@m.scnu.edu.cn](mailto:zhenggang.lan@m.scnu.edu.cn) (Z. L.).

## Table of contents

|                                                                                                                                             |     |
|---------------------------------------------------------------------------------------------------------------------------------------------|-----|
| 1. Details for generation of wavefunctions and multireference configurations in the OM2/MRCI calculations.....                              | S1  |
| 2. Active space orbitals for <i>ZP-DDIYM</i> and <i>ZP-DDPYM</i> .....                                                                      | S2  |
| 3. Optimized local minima geometries in the ground state of <i>DDIYM</i> and <i>DDPYM</i> .....                                             | S4  |
| 4. Hydrogen bond length in fjord region of <i>ZP-DDIYM</i> and <i>ZP-DDPYM</i> .....                                                        | S5  |
| 5. Optimized geometries of conical intersection in the photoisomerization processes of <i>DDIYM</i> and <i>DDPYM</i> .....                  | S6  |
| 6. Time-dependent evolution of geometrical parameters in one typical trajectory of <i>DDIYM</i> and <i>DDPYM</i> .....                      | S12 |
| 7. Absorption spectra of different isomers of <i>DDIYM</i> and <i>DDPYM</i> .....                                                           | S16 |
| 8. Transition state geometries and energy barriers in the ground state of <i>DDIYM</i> and <i>DDPYM</i> .....                               | S17 |
| 9. Schematic representation of the potential energy profile of the $S_0$ and $S_1$ states of <i>DDIYM</i> .....                             | S20 |
| 10. Cartesian coordinates for several structures of <i>DDIYM</i> and <i>DDPYM</i> optimized with the OM2/MRCI method.....                   | S21 |
| 11. Cartesian coordinates for several structures of <i>DDIYM</i> and <i>DDPYM</i> optimized with the B3LYP-D3/6-31G(d,p) method.....        | S28 |
| 12. Cartesian coordinates for several structures of <i>DDIYM</i> and <i>DDPYM</i> optimized with the $\omega$ B97X-D/6-31G(d,p) method..... | S33 |
| 13. Cartesian coordinates for $S_1/S_0$ conical intersections of <i>DDIYM</i> and <i>DDPYM</i> optimized with the CASSCF method.....        | S38 |
| 14. References.....                                                                                                                         | S41 |

## **1. Details for generation of wavefunctions and multireference configurations in the OM2/MRCI calculations**

In the standard OM2/MRCI implementation, the molecular orbitals are generated from the Hartree-Fock calculations with the OM2 Hamiltonian. Then all of these orbitals are frozen and several references are built. From each reference, different configurations are generated by electronic excitations. Then all configurations are combined to define the total wavefunctions and only the configuration interaction vectors are solved without the further optimization of the molecular orbitals. In the current work, the ROHF calculations were made to obtain all molecular orbitals. Next, we selected three references, including the closed-shell ground-state configuration and single and double excitations from the highest occupied molecular orbital (HOMO) to the lowest unoccupied molecular orbital (LUMO). Then all configurations in MRCI wavefunctions were generated by the single or double excitations of these references.

## 2. Active space orbitals for *ZP*-DDIYM and *ZP*-DDPYM

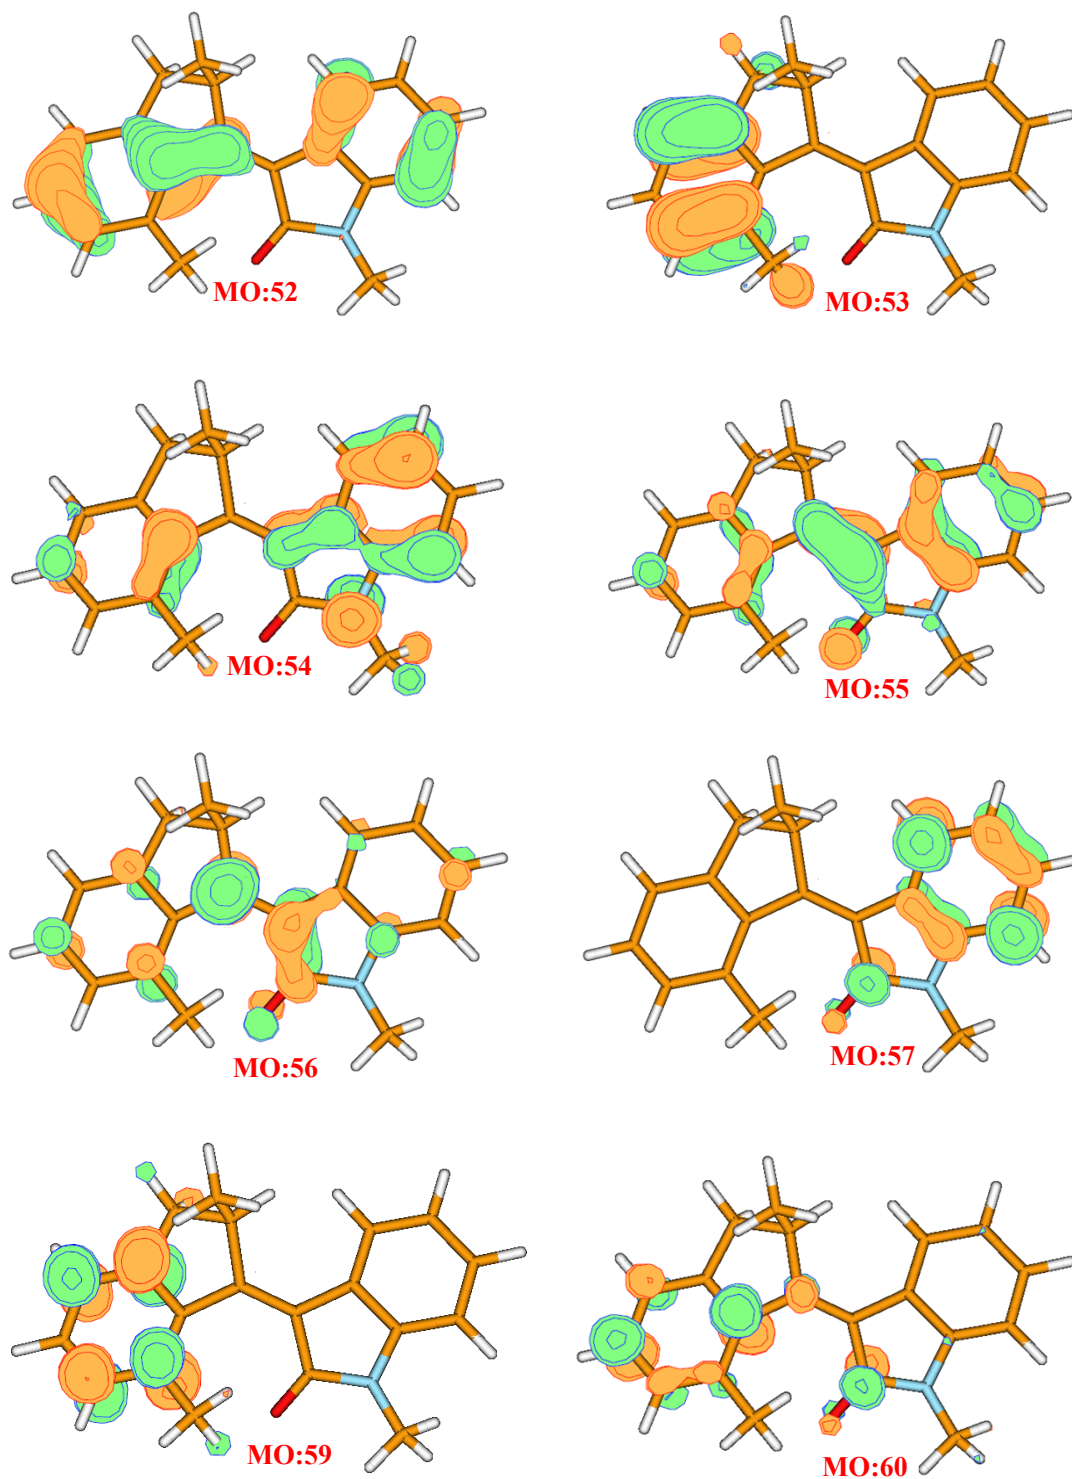

**Figure S1:** Active space orbitals for the *ZP* conformer of DDIYM calculated with the OM2/MRCI method implemented in MNDO99<sup>S1</sup> program.

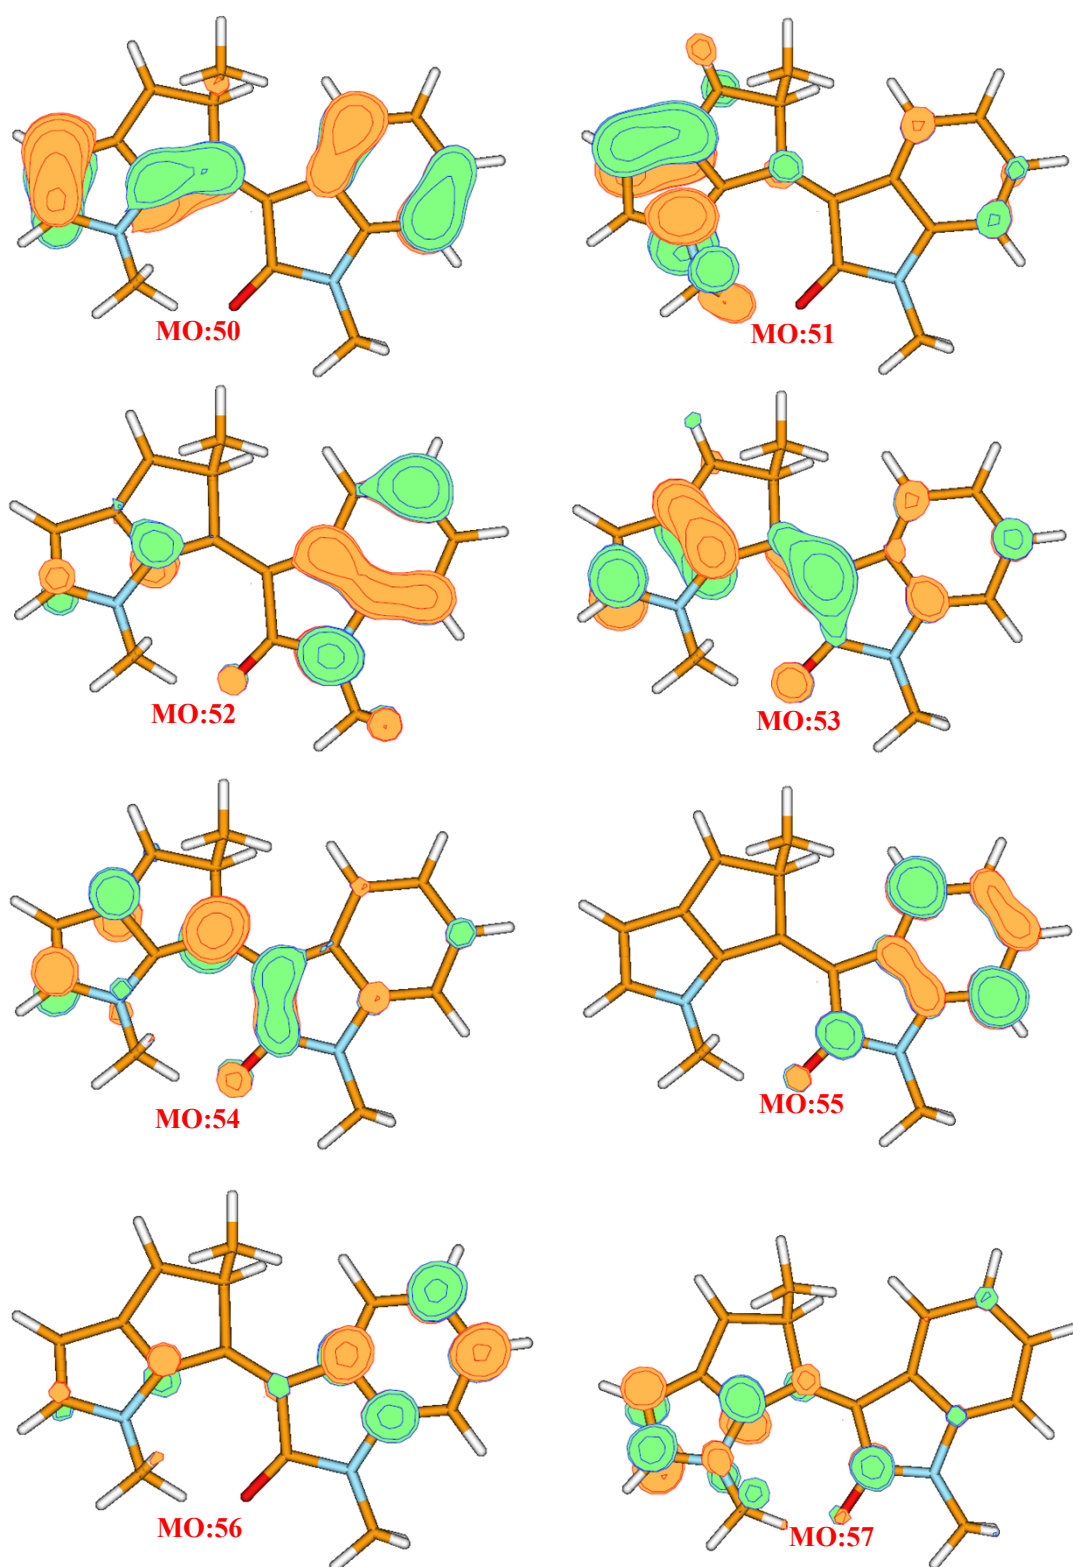

**Figure S2:** Active space orbitals of the *ZP* conformer of DDPYM calculated with the OM2/MRCI method implemented in MNDO99<sup>S1</sup> program.

### 3. Optimized local minima geometries in the ground state of DDIYM and DDPYM

#### (1) Optimized local minima geometries for DDIYM

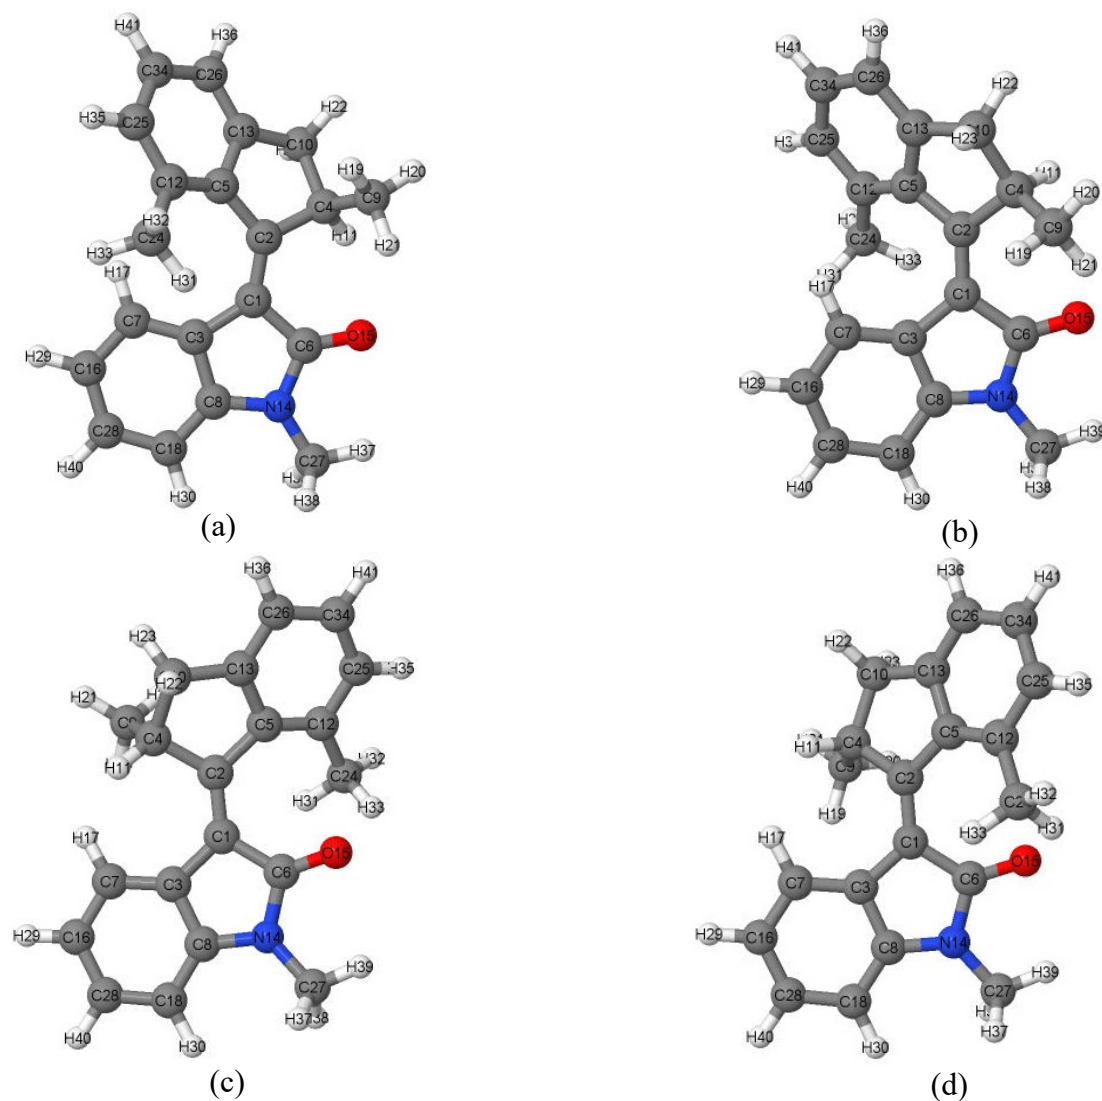

**Figure S3.** Optimized ground state geometries of (a) *EP*, (b) *EM*, (c) *ZP* and (d) *ZM* isomers for DDIYM calculated with the OM2/MRCI method implemented in MNDO99<sup>S1</sup> program. All atoms are labelled.

Table S1. Optimized geometrical parameters of ground state DDIYM, obtained from different methods. OM2/MRCI is implemented in MNDO99<sup>S1</sup> program; while B3LYP-D3/6-31G(d,p) and  $\omega$ B97X-D/6-31G(d,p) are both implemented in Gaussian 09<sup>S2</sup> program. The lengths are in angstroms; the dihedral angles and bond angles are in degrees.

|           |             | B3LYP-D3/6-31G(d,p) | $\omega$ B97X-D/6-31G(d,p) | OM2/MRCI |
|-----------|-------------|---------------------|----------------------------|----------|
| <i>EP</i> | C1-C2       | 1.36                | 1.35                       | 1.36     |
|           | C5-C2-C1    | 129.2               | 129.1                      | 129.4    |
|           | C2-C1-C3    | 131.9               | 131.9                      | 132.4    |
|           | C5-C2-C1-C3 | 14.4                | 12.1                       | 11.6     |
|           | C5-C2-C1-C6 | -168.1              | -169.6                     | -172.0   |
|           | C1-C6-C3-C2 | 1.0                 | 0.7                        | 1.4      |
| <i>EM</i> | C1-C2       | 1.37                | 1.36                       | 1.36     |
|           | C5-C2-C1    | 126.9               | 126.5                      | 126.3    |
|           | C2-C1-C3    | 130.1               | 129.9                      | 129.0    |
|           | C5-C2-C1-C3 | -25.1               | -23.2                      | -22.7    |
|           | C5-C2-C1-C6 | 153.8               | 155.7                      | 159.3    |
|           | C1-C6-C3-C2 | 0.4                 | 0.5                        | -0.8     |
| <i>ZP</i> | C1-C2       | 1.36                | 1.36                       | 1.36     |
|           | C5-C2-C1    | 129.9               | 130.0                      | 128.7    |
|           | C2-C1-C3    | 129.1               | 128.7                      | 128.2    |
|           | C5-C2-C1-C3 | -174.3              | -175.8                     | -174.1   |
|           | C5-C2-C1-C6 | 16.6                | 15.7                       | 13.1     |
|           | C1-C6-C3-C2 | -4.3                | -4.6                       | -2.8     |
| <i>ZM</i> | C1-C2       | 1.37                | 1.36                       | 1.37     |
|           | C5-C2-C1    | 128.1               | 128.1                      | 128.5    |
|           | C2-C1-C3    | 129.6               | 129.4                      | 127.5    |
|           | C5-C2-C1-C3 | 157.0               | 158.0                      | 158.9    |
|           | C5-C2-C1-C6 | -32.1               | -31.4                      | -26.6    |
|           | C1-C6-C3-C2 | 3.6                 | 3.8                        | 2.2      |

## (2) Optimized local minima geometries for DDPYM

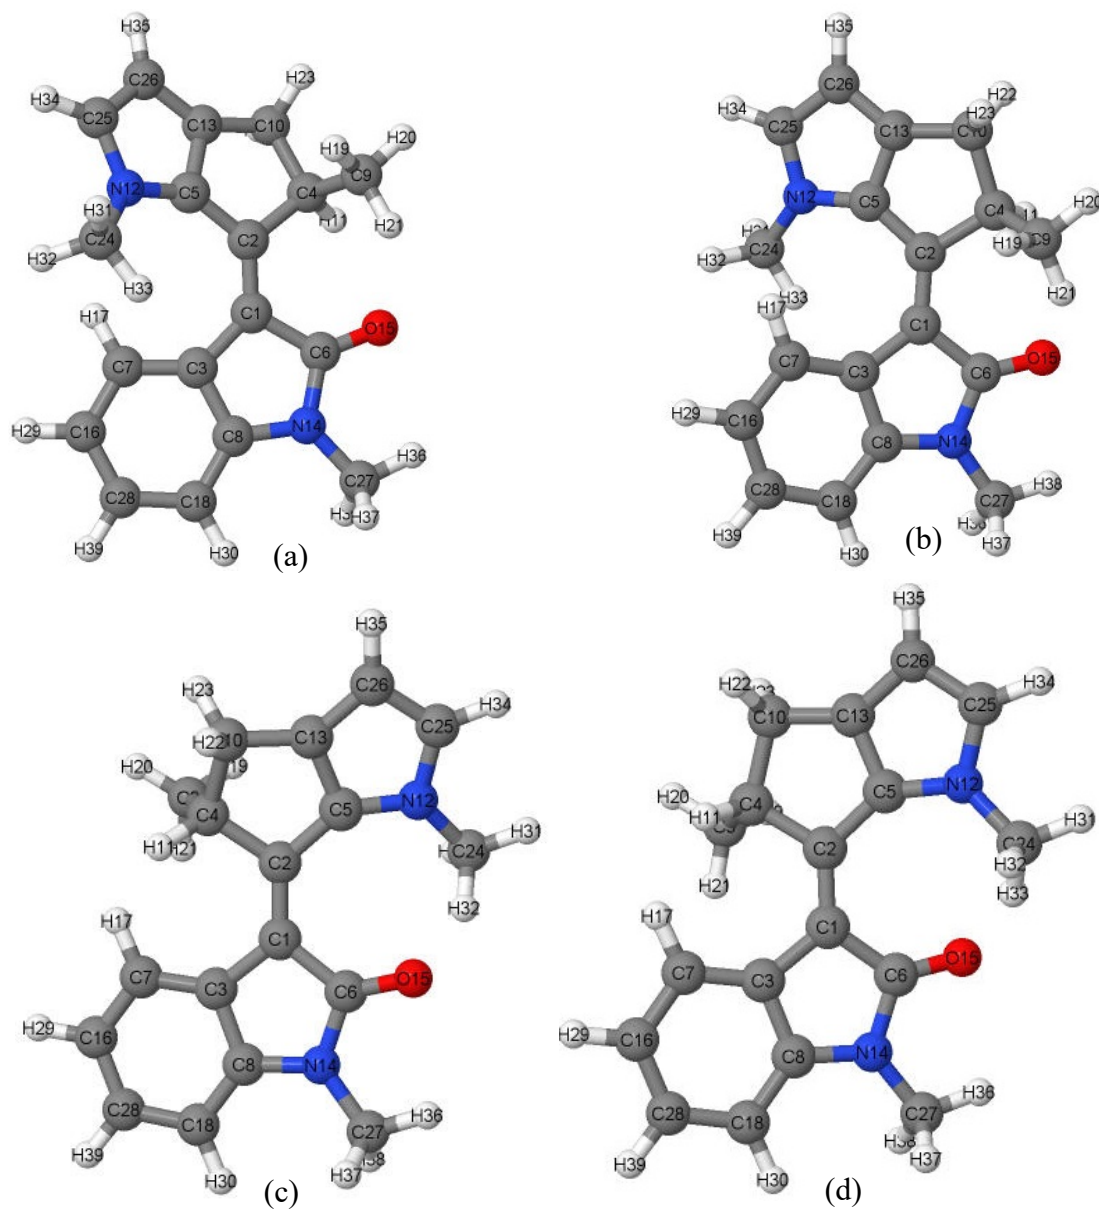

**Figure S4.** Optimized ground state geometries of (a) *EP*, (b) *EM*, (c) *ZP* and (d) *ZM* isomers for DDPYM calculated with the OM2/MRCI method implemented in MNDO99<sup>S1</sup> program. All atoms are labelled.



Table S2. Optimized geometrical parameters of ground state DDPM, obtained from different methods. OM2/MRCI is implemented in MNDO99<sup>S1</sup> program; while B3LYP-D3/6-31G(d,p) and  $\omega$ B97X-D/6-31G(d,p) are both implemented in Gaussian 09<sup>S2</sup> program. The lengths are in angstroms; the dihedral angles and bond angles are in degrees.

|           |             | B3LYP-D3/6-31G(d,p) | $\omega$ B97X-D/6-31G(d,p) | OM2/MRCI |
|-----------|-------------|---------------------|----------------------------|----------|
| <i>EP</i> | C1-C2       | 1.37                | 1.36                       | 1.36     |
|           | C5-C2-C1    | 130.9               | 130.9                      | 130.3    |
|           | C2-C1-C3    | 131.3               | 131.4                      | 132.3    |
|           | C5-C2-C1-C3 | 13.3                | 11.9                       | 7.9      |
|           | C5-C2-C1-C6 | -169.2              | -170.3                     | -170.4   |
|           | C1-C6-C3-C2 | 1.0                 | 0.9                        | -0.7     |
| <i>EM</i> | C1-C2       | 1.38                | 1.37                       | 1.36     |
|           | C5-C2-C1    | 130.4               | 130.0                      | 128.5    |
|           | C2-C1-C3    | 131.0               | 130.7                      | 130.6    |
|           | C5-C2-C1-C3 | -23.9               | -22.6                      | -17.2    |
|           | C5-C2-C1-C6 | 153.3               | 153.9                      | 159.1    |
|           | C1-C6-C3-C2 | 1.2                 | 1.4                        | 1.5      |
| <i>ZP</i> | C1-C2       | 1.37                | 1.36                       | 1.36     |
|           | C5-C2-C1    | 132.2               | 132.4                      | 131.8    |
|           | C2-C1-C3    | 129.6               | 129.4                      | 128.4    |
|           | C5-C2-C1-C3 | -175.8              | -176.3                     | -177.2   |
|           | C5-C2-C1-C6 | 14.1                | 13.5                       | 7.0      |
|           | C1-C6-C3-C2 | -4.0                | -3.9                       | -1.7     |
| <i>ZM</i> | C1-C2       | 1.38                | 1.37                       | 1.37     |
|           | C5-C2-C1    | 130.8               | 131.0                      | 131.6    |
|           | C2-C1-C3    | 129.5               | 129.3                      | 127.6    |
|           | C5-C2-C1-C3 | 160.0               | 161.1                      | 163.8    |
|           | C5-C2-C1-C6 | -28.1               | -27.0                      | -19.4    |
|           | C1-C6-C3-C2 | 3.3                 | 3.3                        | 1.2      |

#### 4. Hydrogen bond length in fjord region of *ZP-DDIYM* and *ZP-DDPYM*

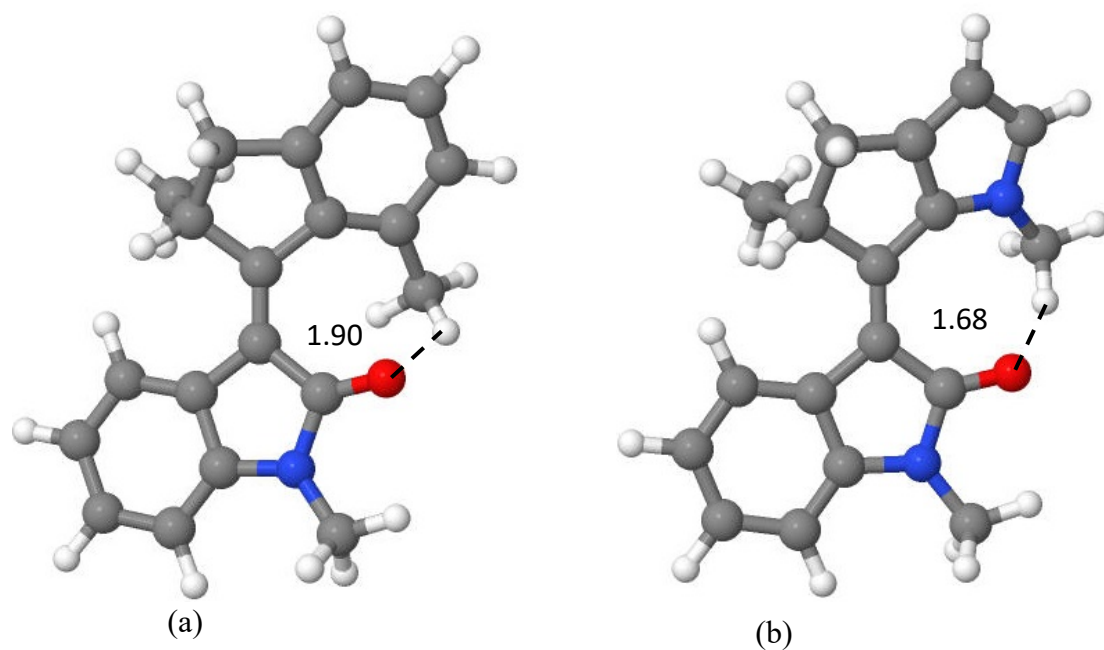

**Figure S5.** Hydrogen bond length in fjord region of ground state (a) *ZP-DDIYM* and (b) *ZP-DDPYM*. The geometries were optimized based on the OM2/MRCI method implemented in MNDO99<sup>S1</sup> program. The unit is angstroms.

## 5. Optimized geometries of conical intersection in the photoisomerization processes of DDIYM and DDPYM

### (1) Optimized conical intersections for DDIYM

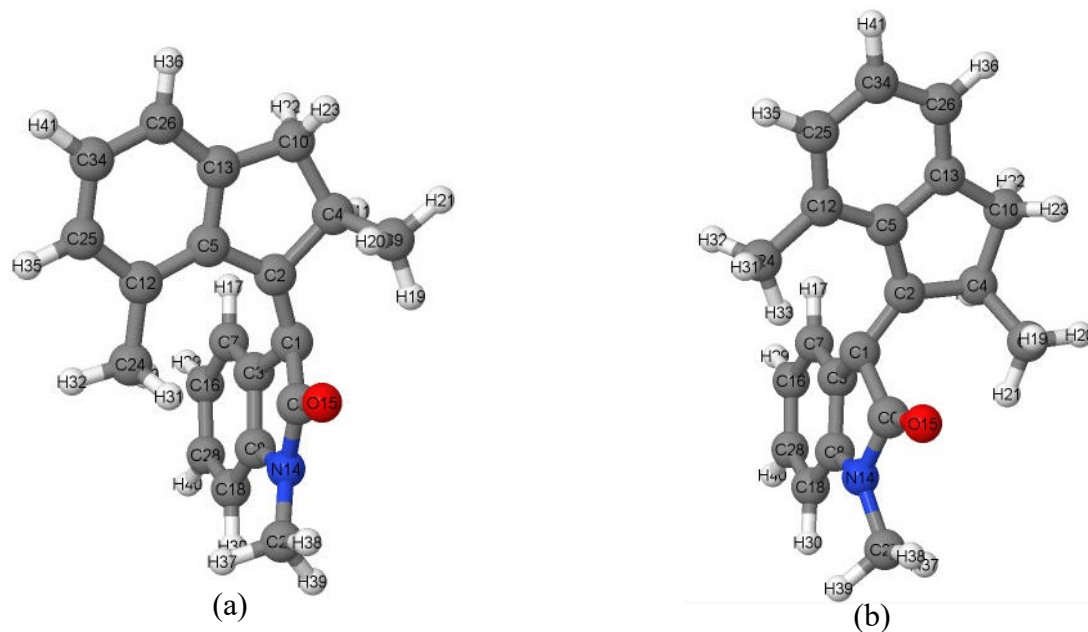

**Figure S6.** Optimized geometries of two  $S_1/S_0$  conical intersections (a) *ECI(1)* and (b) *ECI(2)* in the  $EP \rightarrow ZM$  photoisomerization process of DDIYM calculated with the OM2/MRCI method implemented in MNDO99<sup>S1</sup> program.

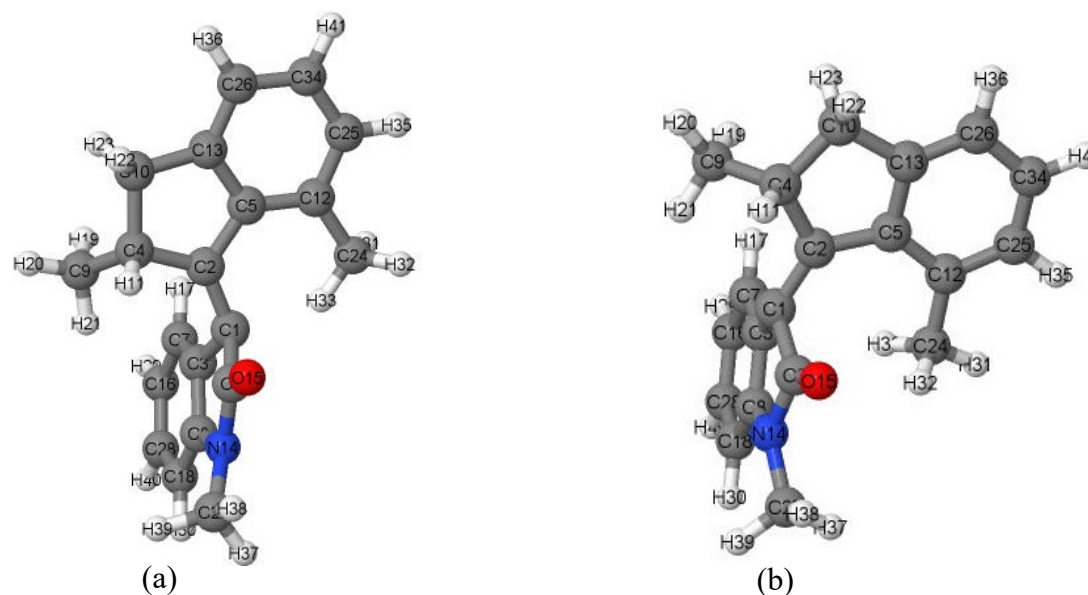

**Figure S7.** Optimized geometries of two  $S_1/S_0$  conical intersections (a) *ZCI(1)* and (b) *ZCI(2)* in the  $ZP \rightarrow EM$  photoisomerization process of DDIYM calculated with the OM2/MRCI method implemented in MNDO99<sup>S1</sup> program.

Table S3. Optimized geometrical parameters of four  $S_1/S_0$  conical intersections ( $ECI(1)$  and  $ECI(2)$  in the  $EP \rightarrow ZM$  photoisomerization process of DDIYM, together with  $ZCI(1)$  and  $ZCI(2)$  in the  $ZP \rightarrow EM$  photoisomerization process) obtained from different methods. OM2/MRCI is implemented in MNDO99<sup>S1</sup> program; while CASSCF(12,12)/6-31G(d) is implemented in MOLPRO<sup>S3,S4</sup> program. The lengths are in angstroms; the dihedral angles and bond angles are in degrees.

|          |             | OM2/MRCI | CASSCF(12,12)/6-31G(d) |
|----------|-------------|----------|------------------------|
| $ECI(1)$ | C1-C2       | 1.38     | 1.43                   |
|          | C5-C2-C1    | 131.7    | 129.4                  |
|          | C2-C1-C3    | 123.0    | 137.1                  |
|          | C5-C2-C1-C3 | 66.0     | 69.7                   |
|          | C5-C2-C1-C6 | -65.4    | -76.8                  |
|          | C1-C6-C3-C2 | -21.8    | -14.8                  |
| $ECI(2)$ | C1-C2       | 1.40     | 1.44                   |
|          | C5-C2-C1    | 123.4    | 126.6                  |
|          | C2-C1-C3    | 117.6    | 137.7                  |
|          | C5-C2-C1-C3 | 120.2    | 119.5                  |
|          | C5-C2-C1-C6 | -117.8   | -98.4                  |
|          | C1-C6-C3-C2 | 27.0     | 16.7                   |
| $ZCI(1)$ | C1-C2       | 1.40     | 1.43                   |
|          | C5-C2-C1    | 123.8    | 128.5                  |
|          | C2-C1-C3    | 121.1    | 130.7                  |
|          | C5-C2-C1-C3 | -123.5   | -106.1                 |
|          | C5-C2-C1-C6 | 113.7    | 104.4                  |
|          | C1-C6-C3-C2 | -26.4    | -14.1                  |
| $ZCI(2)$ | C1-C2       | 1.37     | 1.43                   |
|          | C5-C2-C1    | 131.8    | 129.4                  |
|          | C2-C1-C3    | 125.3    | 131.6                  |
|          | C5-C2-C1-C3 | -67.0    | -72.5                  |
|          | C5-C2-C1-C6 | 64.7     | 74.7                   |
|          | C1-C6-C3-C2 | 21.5     | 15.1                   |

## (2) Optimized $S_1/S_0$ conical intersections of DDPYM

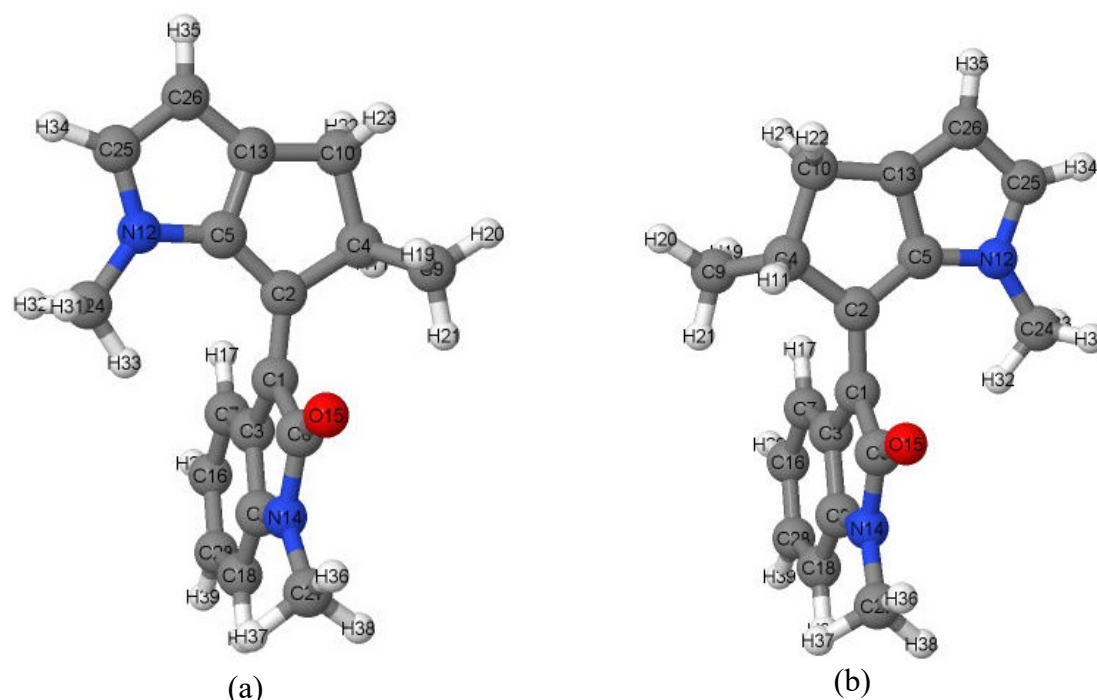

**Figure S8.** Optimized geometries of  $S_0/S_1$  conical intersections (a) *ECI* in the  $EP \rightarrow ZM$  photoisomerization process and (b) *ZCI* in the  $ZP \rightarrow EM$  photoisomerization process of DDPYM calculated with the OM2/MRCI method implemented in MNDO99<sup>S1</sup> program.

**Table S4.** Optimized geometrical parameters of  $S_0/S_1$  conical intersections (a) *ECI* in the  $EP \rightarrow ZM$  photoisomerization process and (b) *ZCI* in the  $ZP \rightarrow EM$  photoisomerization process of DDPYM, obtained from different methods. OM2/MRCI is implemented in MNDO99<sup>S1</sup> program; while CASSCF(10,9)/6-31G(d) is implemented in MOLPRO<sup>S3,S4</sup> program. The lengths are in angstroms; the dihedral angles and bond angles are in degrees.

|            |             | OM2/MRCI | CASSCF(10,9)/6-31G(d) |
|------------|-------------|----------|-----------------------|
| <i>ECI</i> | C1-C2       | 1.40     | 1.45                  |
|            | C5-C2-C1    | 126.0    | 127.9                 |
|            | C2-C1-C3    | 128.7    | 128.6                 |
|            | C5-C2-C1-C3 | 94.3     | 89.2                  |
|            | C5-C2-C1-C6 | -94.1    | -90.2                 |
|            | C1-C6-C3-C2 | 3.5      | -0.3                  |
| <i>ZCI</i> | C1-C2       | 1.40     | 1.45                  |
|            | C5-C2-C1    | 126.1    | 127.9                 |
|            | C2-C1-C3    | 129.1    | 129.6                 |
|            | C5-C2-C1-C3 | -95.1    | -92.6                 |
|            | C5-C2-C1-C6 | 93.2     | 87.7                  |
|            | C1-C6-C3-C2 | -3.5     | -0.2                  |

## 6. Time-dependent evolution of geometrical parameters in a typical trajectory of DDIYM and DDPYM

In order to explore the reaction dynamics of LDMRMs DDIYM and DDPYM in detail, time dependent evolution of geometrical parameters in a typical trajectory for both  $EP \rightarrow ZP$  and  $ZP \rightarrow EP$  photoisomerization processes are presented in the following.

### (1) Typical trajectories for DDIYM

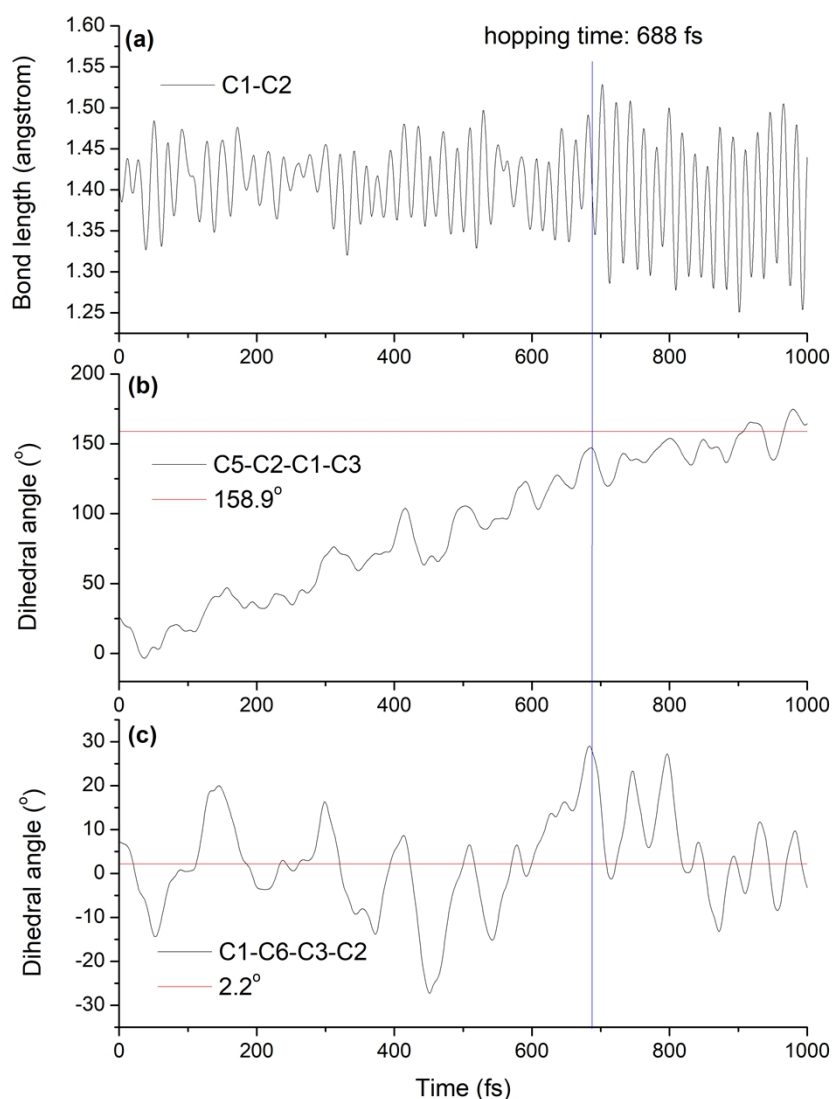

**Figure S9.** Time dependence of (a) central bond length C1-C2, (b) central dihedral angle C5-C2-C1-C3, and (c) pyramid dihedral angle C1-C6-C3-C2 in a representative trajectory of  $EP \rightarrow ZM$  photoisomerization process for DDIYM. The corresponding geometrical parameters of reaction product  $ZM$  isomer are also shown in the figure with red lines.

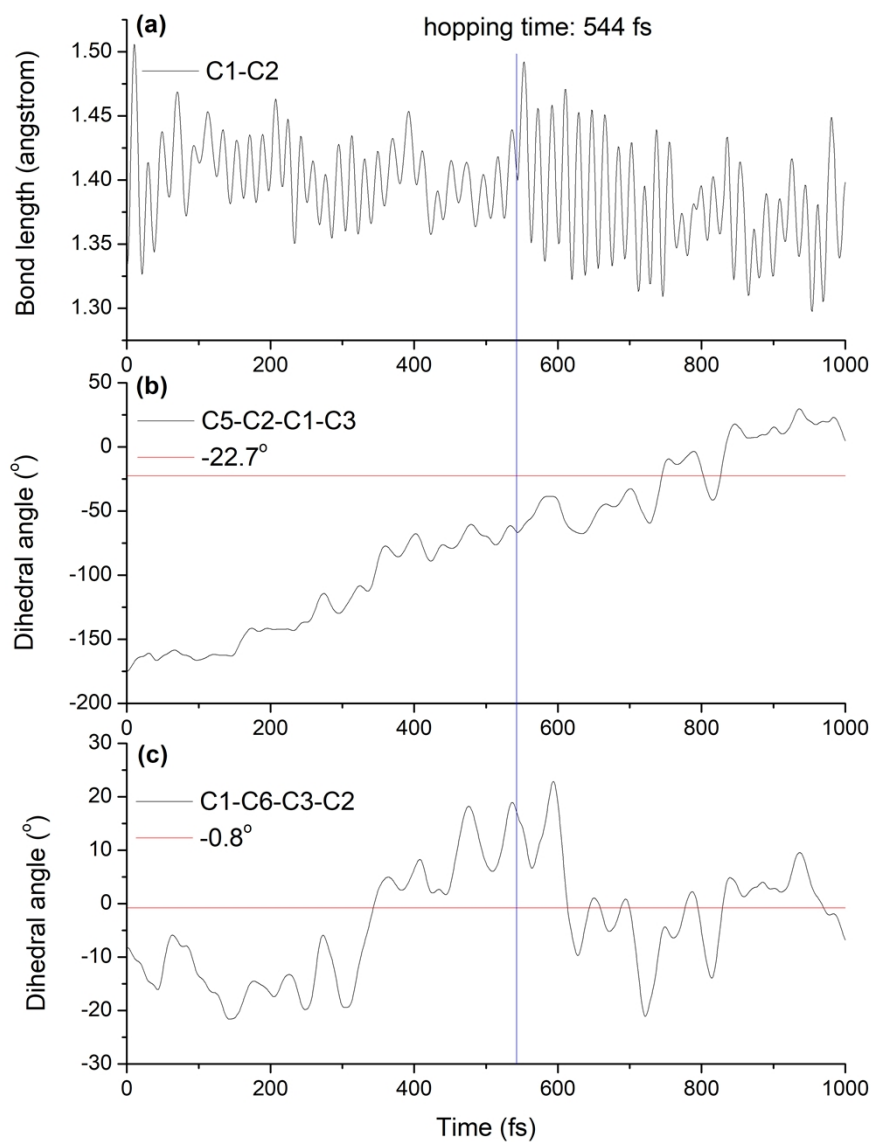

**Figure S10.** Time dependence of (a) central bond length C1-C2, (b) central dihedral angle C5-C2-C1-C3, and (c) pyramid dihedral angle C1-C6-C3-C2 in a representative trajectory of  $ZP \rightarrow EM$  photoisomerization process for DDIYM. The corresponding geometrical parameters of reaction product  $EM$  isomer is also shown in the figure with red lines.

## (2) Typical trajectories of DDPYM

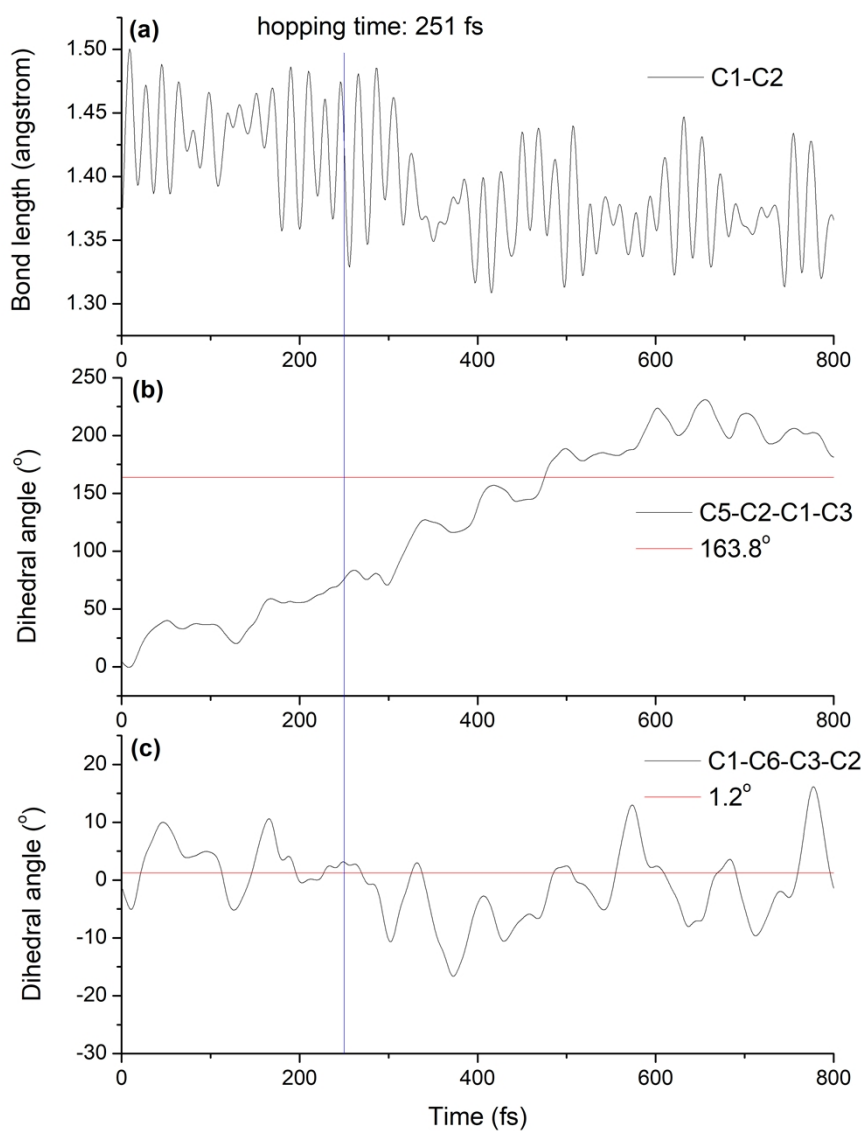

**Figure S11.** Time dependence of (a) central bond length C1-C2, (b) central dihedral angle C5-C2-C1-C3, and (c) pyramid dihedral angle C1-C6-C3-C2 in a representative trajectory of *EP*→*ZM* photoisomerization process for DDPYM. The corresponding geometrical parameters of reaction product *ZM* isomer is also shown in the figure with red lines.



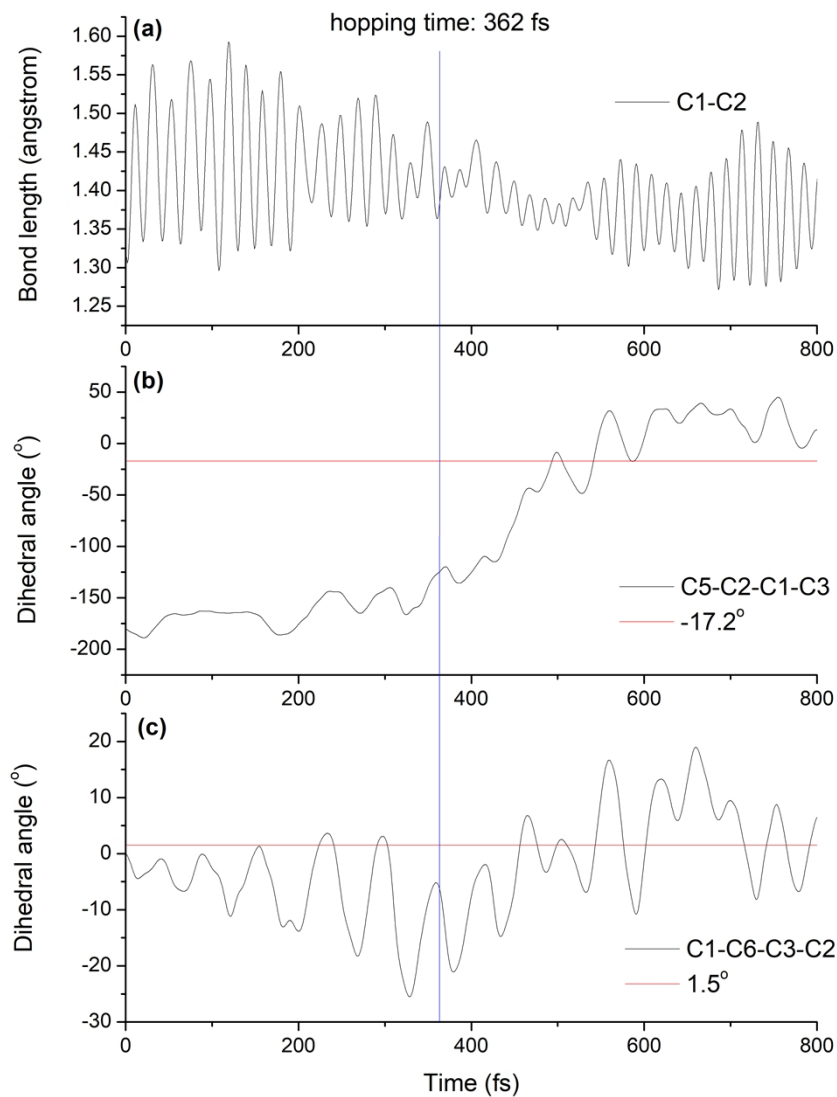

**Figure S12.** Time dependence of (a) central bond length C1-C2, (b) central dihedral angle C5-C2-C1-C3, and (c) pyramid dihedral angle C1-C6-C3-C2 in a representative trajectory of  $ZP \rightarrow EM$  photoisomerization process for DDPYM. The corresponding geometrical parameters of reaction product  $EM$  isomer is also shown in the figure with red lines.

## 7. Absorption spectra of different isomers of DDIYM and DDPYM

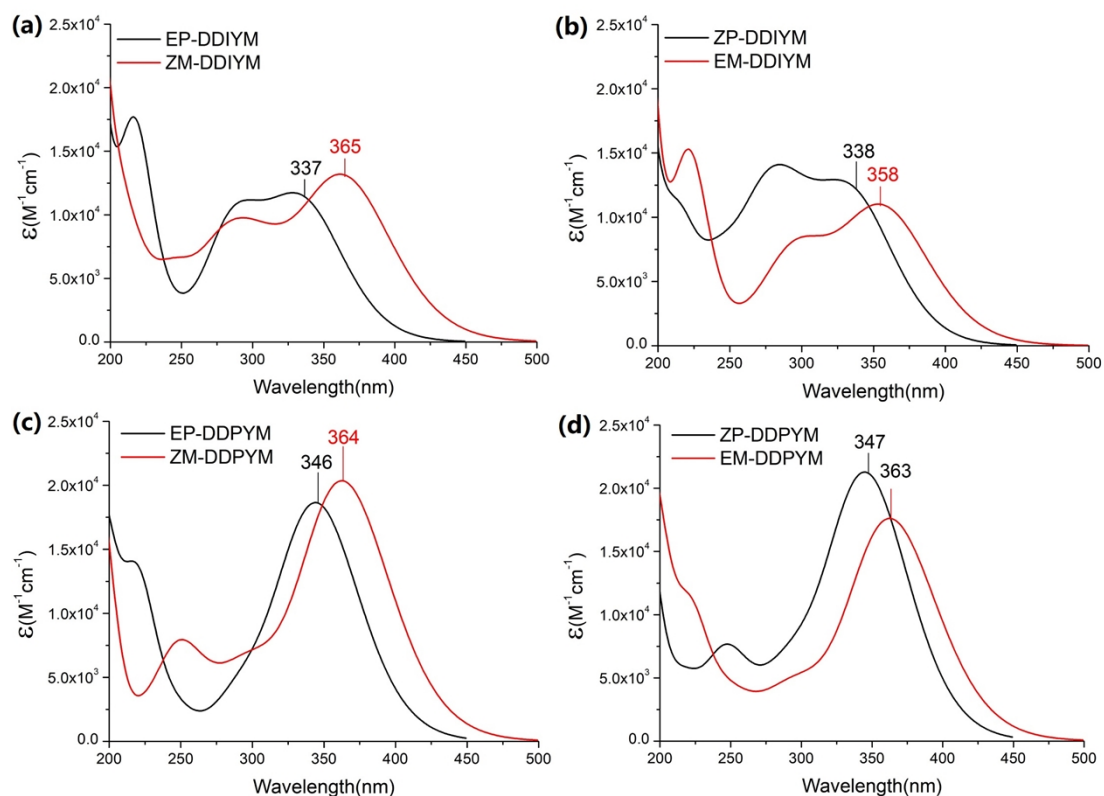

**Figure S13.** Simulated absorption spectra and their maxima calculated at the TD- $\omega$ B97X-D/6-31G(d,p) level of theory for (a) EP and ZM isomers for DDIYM; (b) ZP and EM isomers for DDIYM; (c) EP and ZM isomers of DDPYM; (d) ZP and EM isomers of DDPYM.

## 8. Transition state geometries and energy barriers in the ground state of DDIYM and DDPYM

### (1) Transition state geometries in the ground state for DDIYM

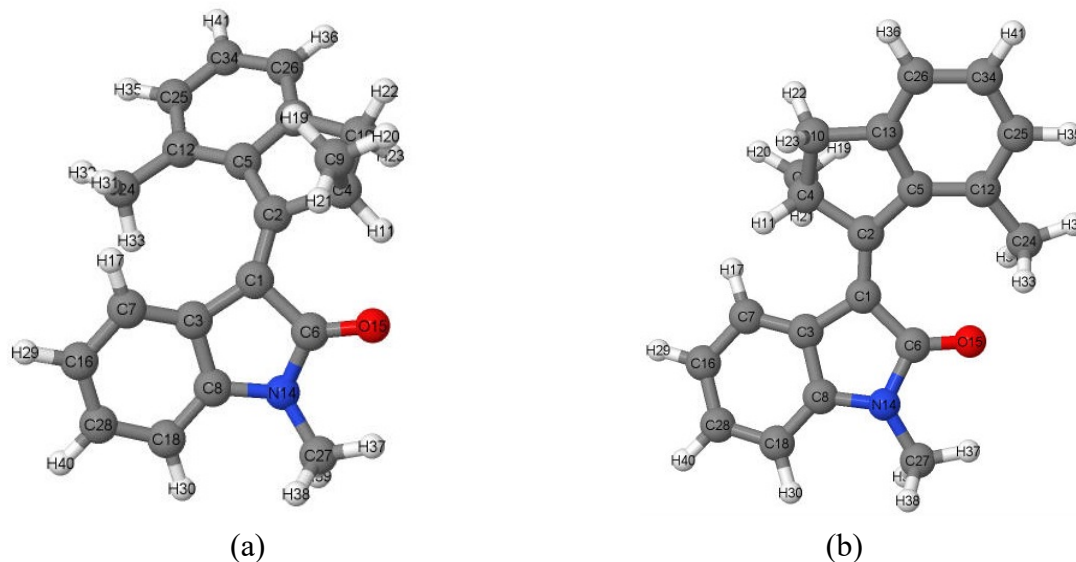

**Figure S14.** Optimized transition state geometries of (a) *EM-EP-TS* and (b) *ZM-ZP-TS* for ground state DDIYM calculated with the OM2/MRCI method implemented in MNDO99<sup>S1</sup> program. All atoms are labelled.

**Table S5.** Optimized transition state geometrical parameters of DDIYM, obtained from different methods. The OM2/MRCI method is implemented in MNDO99<sup>S1</sup> program; while B3LYP-D3/6-31G(d,p) and  $\omega$ B97X-D/6-31G(d,p) method are all implemented in Gaussian 09<sup>S2</sup> program. The lengths are in angstroms; the dihedral angles and bond angles are in degrees.

|                 |             | OM2/MRCI | B3LYP-D3/6-31G(d,p) | $\omega$ B97X-D/6-31G(d,p) |
|-----------------|-------------|----------|---------------------|----------------------------|
| <i>EM-EP-TS</i> | C1-C2       | 1.37     | 1.38                | 1.37                       |
|                 | C5-C2-C1    | 133.4    | 134.9               | 135.2                      |
|                 | C2-C1-C3    | 137.0    | 135.8               | 135.9                      |
|                 | C5-C2-C1-C3 | -24.0    | -20.1               | -16.5                      |
|                 | C5-C2-C1-C6 | 141.3    | 141.8               | 144.2                      |
|                 | C1-C6-C3-C2 | 5.5      | 6.8                 | 7.1                        |
| <i>ZM-ZP-TS</i> | C1-C2       | 1.37     | 1.38                | 1.37                       |
|                 | C5-C2-C1    | 135.7    | 138.2               | 138.1                      |
|                 | C2-C1-C3    | 126.0    | 126.3               | 126.1                      |
|                 | C5-C2-C1-C3 | 167.5    | 163.7               | 163.8                      |
|                 | C5-C2-C1-C6 | -3.7     | -8.1                | -6.9                       |
|                 | C1-C6-C3-C2 | -3.3     | -3.1                | -3.5                       |

## (2) Transition state geometries in the ground state for DDPYM

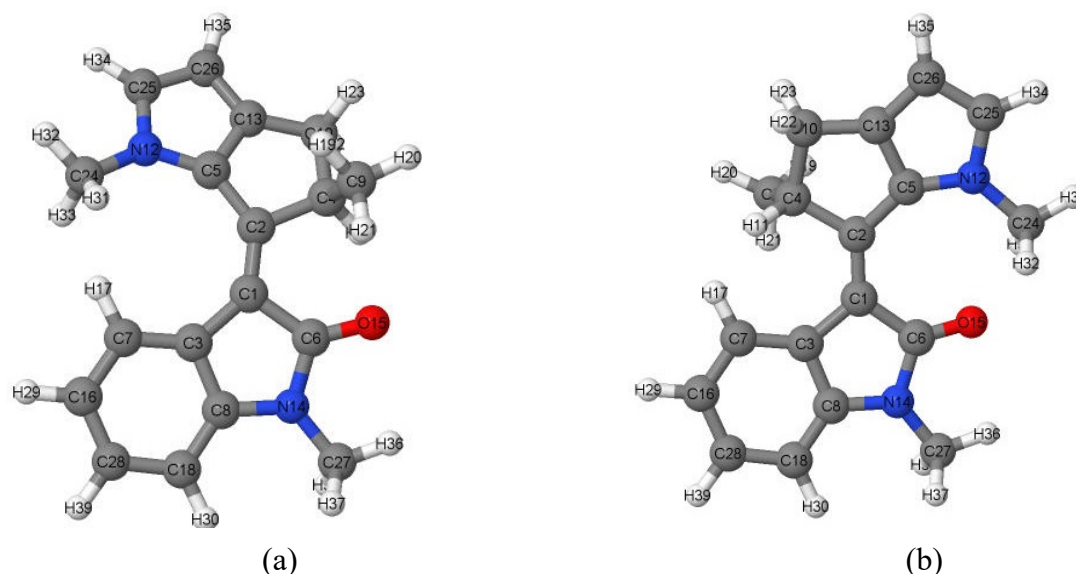

**Figure S15.** Optimized transition state geometries of (a) *EM-EP-TS* and (b) *ZM-ZP-TS* for ground state DDPYM calculated with the OM2/MRCI method implemented in MNDO99<sup>S1</sup> program. All atoms are labelled.

Table S6. Optimized transition state geometrical parameters of LDMMRM DDPYM, obtained from different methods. The OM2/MRCI method is implemented in MNDO99<sup>S1</sup> program; while B3LYP-D3/6-31G(d,p) and  $\omega$ B97X-D/6-31G(d,p) method are both implemented in Gaussian 09<sup>S2</sup> program. The lengths are in angstroms; the dihedral angles and bond angles are in degrees.

|                 |             | OM2/MRCI | B3LYP-D3/6-31G(d,p) | $\omega$ B97X-D/6-31G(d,p) |
|-----------------|-------------|----------|---------------------|----------------------------|
| <i>EM-EP-TS</i> | C1-C2       | 1.37     | 1.38                | 1.37                       |
|                 | C5-C2-C1    | 136.1    | 137.4               | 137.2                      |
|                 | C2-C1-C3    | 137.2    | 135.4               | 135.3                      |
|                 | C5-C2-C1-C3 | 0.0      | -2.5                | -2.2                       |
|                 | C5-C2-C1-C6 | 171.5    | 167.0               | 166.1                      |
|                 | C1-C6-C3-C2 | 3.1      | 4.0                 | 4.4                        |
| <i>ZM-ZP-TS</i> | C1-C2       | 1.36     | 1.38                | 1.37                       |
|                 | C5-C2-C1    | 133.3    | 136.7               | 136.5                      |
|                 | C2-C1-C3    | 127.8    | 128.7               | 128.5                      |
|                 | C5-C2-C1-C3 | 168.9    | 169.5               | 169.0                      |
|                 | C5-C2-C1-C6 | -9.1     | -9.8                | -9.8                       |
|                 | C1-C6-C3-C2 | -0.8     | -0.3                | -0.5                       |

### (3) Energy barriers in the ground state for DDIYM and DDPYM

Table S7. Energy barriers from EM to EP isomers and from ZM to ZP isomers in the ground state for DDIYM and DDPYM, obtained from the OM2/MRCI, B3LYP-D3/6-31G(d,p) and  $\omega$ B97X-D/6-31G(d,p) methods. The energy unit is kcal/mol. The OM2/MRCI method is implemented in MNDO99<sup>S1</sup> program; while B3LYP-D3/6-31G(d,p) and  $\omega$ B97X-D/6-31G(d,p) method are both implemented in Gaussian 09<sup>S2</sup> program.

|       |                       | OM2/MRCI | B3LYP-D3/6-31G(d,p) | $\omega$ B97X-D/6-31G(d,p) |
|-------|-----------------------|----------|---------------------|----------------------------|
| DDIYM | <i>EM</i> → <i>EP</i> | 10.4     | 15.2                | 14.7                       |
|       | <i>ZM</i> → <i>ZP</i> | 7.3      | 11.7                | 11.1                       |
| DDPYM | <i>EM</i> → <i>EP</i> | 5.3      | 8.2                 | 7.8                        |
|       | <i>ZM</i> → <i>ZP</i> | 1.3      | 2.2                 | 1.9                        |

## 9. Schematic representation of the potential energy profile of the $S_0$ and $S_1$ states of DDIYM

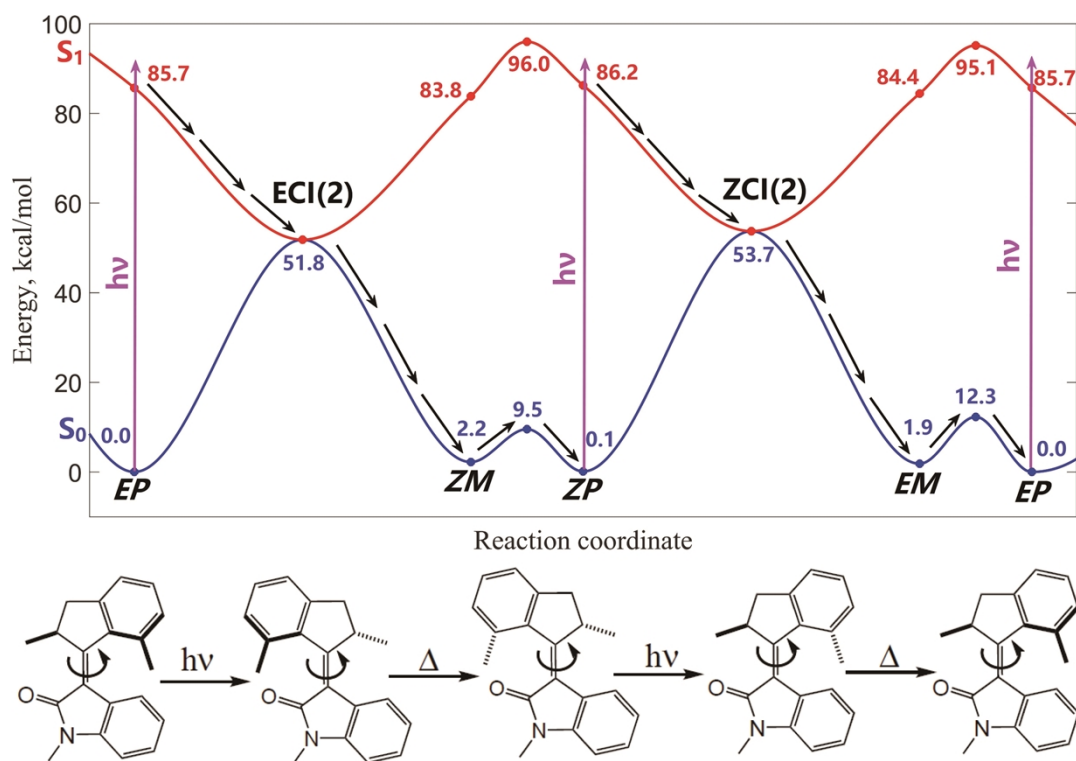

**Figure S16.** Schematic representation of the potential energy profile of the  $S_0$  (blue) and  $S_1$  (red) states of DDIYM along the rotational reaction coordinate, as obtained from OM2/MRCI method. The  $S_0$  energy profile is constructed from the energies of the local minima geometries, CIs and transition states optimized in the ground electronic state. The  $S_1$  energy profile is obtained from the corresponding first excitation energies for local minima geometries, CIs and transition states optimized in the  $S_0$  state. The vertical arrows (magenta) show the vertical excitation at the Franck-Condon region.

## 10. Cartesian coordinates for several structures of DDIYM and DDPYM optimized with the OM2/MRCI method

Unit of the Cartesian coordinate below is angstrom.

### (1) Cartesian coordinates for DDIYM

#### ① Four ground state local minima geometries

| <i>EM</i> -DDIYM |             |             |             | <i>EP</i> -DDIYM |             |             |             |
|------------------|-------------|-------------|-------------|------------------|-------------|-------------|-------------|
| C                | -0.56330457 | 0.56396897  | 0.12080637  | C                | 1.69364295  | 0.54719034  | 0.00316350  |
| C                | 0.77096730  | 0.84610469  | 0.07229342  | C                | 0.47567585  | 1.15160988  | 0.00668170  |
| C                | -1.25395342 | -0.68282487 | -0.20760825 | C                | 2.10863966  | -0.83413172 | -0.24431070 |
| C                | 1.39456347  | 2.21225895  | -0.14868952 | C                | 0.29055368  | 2.65147163  | -0.14612759 |
| C                | 1.86788053  | -0.12788583 | 0.12749659  | C                | -0.86343272 | 0.54995239  | -0.02054081 |
| C                | -1.63566333 | 1.53141816  | 0.49746947  | C                | 2.96019408  | 1.31715989  | 0.20987143  |
| C                | -0.83607204 | -1.83102302 | -0.86623853 | C                | 1.43996482  | -1.93693765 | -0.74285623 |
| C                | -2.65292254 | -0.46378987 | 0.01235533  | C                | 3.53588177  | -0.87371852 | -0.10533901 |
| C                | 0.55379222  | 3.11481298  | -1.03176569 | C                | 0.14284829  | 3.29253265  | 1.22339715  |
| C                | 2.74604753  | 1.88566913  | -0.82951602 | C                | -1.01511762 | 2.75511062  | -0.96594102 |
| H                | 1.56389385  | 2.70196891  | 0.84811549  | H                | 1.15649116  | 3.11147482  | -0.68281190 |
| C                | 1.95620640  | -1.36942659 | 0.76306475  | C                | -1.36936839 | -0.61620389 | 0.55249329  |
| C                | 3.02194365  | 0.46712892  | -0.42786363 | C                | -1.73350507 | 1.47610655  | -0.64116805 |
| N                | -2.86303174 | 0.83334485  | 0.51371760  | N                | 4.02884197  | 0.40004111  | 0.23168743  |
| O                | -1.54186886 | 2.70621768  | 0.88177482  | O                | 3.10681208  | 2.53167782  | 0.40670480  |
| C                | -1.79575620 | -2.79749792 | -1.20529463 | C                | 2.17226037  | -3.10759586 | -1.00498020 |
| H                | 0.21383819  | -1.97158092 | -1.14021576 | H                | 0.36599018  | -1.90280170 | -0.94391729 |
| C                | -3.60616208 | -1.41897640 | -0.34014599 | C                | 4.26327751  | -2.03538995 | -0.37839852 |
| H                | 0.25012034  | 2.58175501  | -1.94631109 | H                | -0.67258630 | 2.81742647  | 1.79045361  |
| H                | 1.15180218  | 3.99604797  | -1.31782271 | H                | -0.08174109 | 4.36473896  | 1.10784410  |
| H                | -0.33281918 | 3.44987241  | -0.49275618 | H                | 1.08349545  | 3.18595544  | 1.77558260  |
| H                | 3.55629535  | 2.56007798  | -0.48429545 | H                | -1.62260597 | 3.63551403  | -0.67282753 |
| H                | 2.65749478  | 1.95846824  | -1.93420985 | H                | -0.79583901 | 2.80780488  | -2.05345721 |
| C                | 0.85884179  | -1.94425909 | 1.59770821  | C                | -0.57467612 | -1.50094163 | 1.45967962  |
| C                | 3.18177937  | -2.06135241 | 0.67131493  | C                | -2.73320842 | -0.90631647 | 0.34567962  |
| C                | 4.22625734  | -0.22552370 | -0.51541843 | C                | -3.07892640 | 1.17818708  | -0.84065788 |
| C                | -4.13351112 | 1.43445078  | 0.77989926  | C                | 5.40891084  | 0.76467199  | 0.33792424  |
| C                | -3.14775795 | -2.60220540 | -0.92238721 | C                | 3.55309439  | -3.15360018 | -0.80309149 |
| H                | -1.47463654 | -3.72212875 | -1.69383854 | H                | 1.64940661  | -3.99511508 | -1.37115459 |
| H                | -4.66905497 | -1.24244442 | -0.16443975 | H                | 5.34859274  | -2.05505813 | -0.25964553 |
| H                | 0.25566710  | -2.64526789 | 1.00690767  | H                | 0.44369921  | -1.12076016 | 1.58829490  |
| H                | 1.29547311  | -2.47794167 | 2.45654410  | H                | -1.07399212 | -1.52178079 | 2.44043262  |
| H                | 0.20733674  | -1.14303881 | 1.96842652  | H                | -0.53127423 | -2.52297124 | 1.05812053  |
| C                | 4.27957137  | -1.51199036 | 0.01713209  | C                | -3.55837247 | -0.04010560 | -0.36677668 |
| H                | 3.27108210  | -3.04561974 | 1.13798891  | H                | -3.15158570 | -1.82486479 | 0.76431687  |
| H                | 5.10711250  | 0.23340150  | -0.97005181 | H                | -3.74168358 | 1.88746437  | -1.34247926 |
| H                | -4.68302125 | 0.86694773  | 1.56994487  | H                | 5.49273370  | 1.84756703  | 0.54754189  |
| H                | -4.77393242 | 1.45039913  | -0.13872885 | H                | 5.90478896  | 0.19983939  | 1.16431927  |
| H                | -3.98648383 | 2.47455006  | 1.12666396  | H                | 5.95925329  | 0.54055945  | -0.61067177 |
| H                | -3.87043204 | -3.38717996 | -1.17717202 | H                | 4.09323072  | -4.08900510 | -0.99806390 |
| H                | 5.21593645  | -2.08157863 | -0.03879080 | H                | -4.61261609 | -0.30328546 | -0.51948563 |

| <i>ZM</i> -DDIYM |             |             |             | <i>ZP</i> -DDIYM |             |             |             |
|------------------|-------------|-------------|-------------|------------------|-------------|-------------|-------------|
| C                | -0.50193320 | -0.01613759 | -0.06440327 | C                | 0.57509079  | -0.02546923 | -0.03813928 |
| C                | 0.70323174  | 0.62897322  | 0.01576771  | C                | -0.63115932 | 0.60750892  | -0.04092225 |
| C                | -1.83001728 | 0.53901053  | 0.20925890  | C                | 1.91424118  | 0.57259860  | 0.02597642  |
| C                | 0.84592998  | 2.13219185  | -0.14602933 | C                | -0.81596786 | 2.09033284  | -0.31224774 |
| C                | 2.03826037  | 0.04931017  | 0.16493280  | C                | -1.97716276 | 0.02139188  | 0.01302078  |

|   |             |             |             |   |             |             |              |
|---|-------------|-------------|-------------|---|-------------|-------------|--------------|
| C | -0.74015958 | -1.39884001 | -0.55920651 | C | 0.80294227  | -1.48556686 | -0.25150364  |
| C | -2.26004117 | 1.72282707  | 0.79616034  | C | 2.37371409  | 1.86282811  | 0.22772409   |
| C | -2.78610674 | -0.49575377 | -0.04826972 | C | 2.86319441  | -0.49444191 | -0.08813779  |
| C | 0.04394275  | 2.60368817  | -1.35178845 | C | -0.96151723 | 2.84085400  | 1.00206044   |
| C | 2.34979375  | 2.37639682  | -0.38998618 | C | -2.13364860 | 2.13738058  | -1.11540058  |
| H | 0.50463814  | 2.66024309  | 0.78651252  | H | 0.03420837  | 2.50759946  | -0.021432688 |
| C | 2.46231342  | -1.20197953 | 0.64310812  | C | -2.47587320 | -1.10996485 | 0.66815126   |
| C | 2.99496007  | 1.05438840  | -0.09128483 | C | -2.85696046 | 0.90741701  | -0.64229256  |
| N | -2.13313359 | -1.63818522 | -0.53826105 | N | 2.19505255  | -1.71687557 | -0.25693464  |
| O | 0.04589058  | -2.20962685 | -1.07199604 | O | -0.00405985 | -2.38844585 | -0.51671965  |
| C | -3.62604893 | 1.89318294  | 1.05979861  | C | 3.75750773  | 2.09037763  | 0.28524781   |
| H | -1.55080721 | 2.51461136  | 1.06230680  | H | 1.68520938  | 2.70573314  | 0.34157907   |
| C | -4.14358167 | -0.33093295 | 0.22211758  | C | 4.24004714  | -0.27123654 | -0.02020875  |
| H | -1.02573846 | 2.40828525  | -1.21873336 | H | -0.05260057 | 2.72659084  | 1.61093142   |
| H | 0.38315615  | 2.07755901  | -2.25617797 | H | -1.81565563 | 2.44684232  | 1.56994791   |
| H | 0.19485509  | 3.68676268  | -1.48996984 | H | -1.12717461 | 3.91178597  | 0.80614538   |
| H | 2.75727523  | 3.16010591  | 0.28080973  | H | -1.93432224 | 2.06767793  | -2.20387231  |
| H | 2.54312221  | 2.66356049  | -1.44329483 | H | -2.71953686 | 3.05475580  | -0.90544778  |
| C | 1.53928332  | -2.26469424 | 1.12801971  | C | -1.64624980 | -1.99756063 | 1.53034835   |
| C | 3.85181824  | -1.44053244 | 0.69806294  | C | -3.85657395 | -1.37550206 | 0.53533856   |
| C | 4.36153633  | 0.81053393  | -0.02771702 | C | -4.21415708 | 0.63188405  | -0.77084632  |
| C | -2.76343100 | -2.81988807 | -1.03972841 | C | 2.80458822  | -2.97816678 | -0.55012724  |
| C | -4.54923146 | 0.89217137  | 0.76156618  | C | 4.66847966  | 1.04039423  | 0.16127452   |
| H | -3.97376794 | 2.83444649  | 1.49586791  | H | 4.12556800  | 3.11043689  | 0.42864464   |
| H | -4.85805048 | -1.13087344 | 0.01975854  | H | 4.94513823  | -1.10019409 | -0.10394410  |
| H | 1.20439474  | -2.85903464 | 0.27355894  | H | -0.83921242 | -1.41815001 | 2.00402213   |
| H | 2.05792018  | -2.91152307 | 1.85587278  | H | -2.27087826 | -2.44797158 | 2.31989654   |
| H | 0.66554801  | -1.80982773 | 1.61957595  | H | -1.20829154 | -2.78106519 | 0.90615889   |
| C | 4.77878608  | -0.47178954 | 0.34623871  | C | -4.69524058 | -0.54549034 | -0.19101502  |
| H | 4.20182436  | -2.42270605 | 1.03224979  | H | -4.26888378 | -2.26447882 | 1.02195463   |
| H | 5.08694202  | 1.59619518  | -0.24838652 | H | -4.88185621 | 1.31531627  | -1.29883988  |
| H | -3.33078168 | -3.34548482 | -0.23036150 | H | 3.45227170  | -2.90827207 | -1.45868933  |
| H | -3.48372362 | -2.57400867 | -1.85837033 | H | 3.44331602  | -3.31905419 | 0.30254543   |
| H | -1.99525889 | -3.50895788 | -1.43861347 | H | 2.02096252  | -3.73747543 | -0.73204170  |
| H | -5.61443251 | 1.06295563  | 0.95926688  | H | 5.74378219  | 1.25144173  | 0.21475045   |
| H | 5.85165126  | -0.69592244 | 0.39769318  | H | -5.75961138 | -0.79578612 | -0.28767063  |

② Two transition state geometries at ground state

| <i>EM-EP-TS-DDIYM</i> |             |             | <i>ZM-ZP-TS-DDIYM</i> |   |             |             |             |
|-----------------------|-------------|-------------|-----------------------|---|-------------|-------------|-------------|
| C                     | -0.56474829 | -0.46989403 | 0.29227521            | C | -0.57132953 | 0.15135079  | 0.13131335  |
| C                     | 0.79618567  | -0.62429139 | 0.29822943            | C | 0.65959493  | -0.44597640 | 0.09706486  |
| C                     | -1.51863190 | 0.64273300  | 0.35806348            | C | -1.88125753 | -0.54157999 | 0.02066605  |
| C                     | 1.36778073  | -2.01591319 | 0.53191841            | C | 0.71298922  | -1.97169044 | 0.11912617  |
| C                     | 1.92146010  | 0.26380695  | -0.06328513           | C | 2.06432531  | 0.01912421  | -0.04151534 |
| C                     | -1.40723503 | -1.63826651 | -0.13735656           | C | -0.94889240 | 1.60102740  | 0.10531495  |
| C                     | -1.57505718 | 1.80432986  | 1.12049293            | C | -2.32253310 | -1.84483285 | 0.18312178  |
| C                     | -2.71974410 | 0.21802235  | -0.29783041           | C | -2.86156949 | 0.44258829  | -0.32801004 |
| C                     | 1.58794248  | -2.12388016 | 2.03921961            | C | 0.66337442  | -2.42635906 | 1.57146849  |
| C                     | 2.70800078  | -2.03231415 | -0.20979756           | C | 2.04500434  | -2.36601993 | -0.52173542 |
| H                     | 0.70510372  | -2.83258864 | 0.18545025            | H | -0.12473415 | -2.41550395 | -0.48045355 |
| C                     | 2.09682070  | 1.64936083  | -0.22026576           | C | 2.74959412  | 1.23554887  | 0.13094502  |
| C                     | 3.01459699  | -0.57897134 | -0.40239196           | C | 2.84577352  | -1.10814589 | -0.40168539 |
| N                     | -2.59946469 | -1.12393976 | -0.70295168           | N | -2.28351517 | 1.71981186  | -0.34455379 |
| O                     | -1.13380544 | -2.84342603 | -0.21844615           | O | -0.33569045 | 2.62005660  | 0.43530643  |
| C                     | -2.69873675 | 2.63001935  | 1.02546392            | C | -3.67618802 | -2.15979066 | -0.03665430 |
| H                     | -0.76216348 | 2.06377626  | 1.80742538            | H | -1.66784772 | -2.65731009 | 0.51177410  |
| C                     | -3.84342984 | 1.03140669  | -0.39566111           | C | -4.20734087 | 0.13991679  | -0.54614965 |
| H                     | 2.24169573  | -1.31418059 | 2.39865598            | H | 1.54503705  | -2.05086312 | 2.11008949  |
| H                     | 2.05976362  | -3.09149411 | 2.27147215            | H | 0.65762019  | -3.52710384 | 1.62226284  |
| H                     | 0.62420220  | -2.06567484 | 2.56406919            | H | -0.23762242 | -2.04015897 | 2.06865502  |
| H                     | 3.50613474  | -2.54128538 | 0.36656214            | H | 2.53376493  | -3.20974290 | 0.00631298  |
| H                     | 2.60574597  | -2.52363779 | -1.20059776           | H | 1.91870305  | -2.63108515 | -1.59215110 |
| C                     | 1.06431932  | 2.67067984  | 0.11415681            | C | 2.15345205  | 2.54097960  | 0.53016678  |
| C                     | 3.33007001  | 2.13328669  | -0.69278681           | C | 4.14569415  | 1.26442473  | -0.08392757 |



|   |             |             |             |   |             |             |             |
|---|-------------|-------------|-------------|---|-------------|-------------|-------------|
| C | 4.22670696  | -0.09543744 | -0.88486489 | C | 4.22167783  | -1.07227758 | -0.61078460 |
| C | -3.70661574 | -1.96144308 | -1.06033079 | C | -3.02119137 | 2.94383176  | -0.23318749 |
| C | -3.79519392 | 2.27584514  | 0.23991288  | C | -4.59784208 | -1.18651062 | -0.40792565 |
| H | -2.72642826 | 3.56518470  | 1.59427090  | H | -4.00607080 | -3.19249589 | 0.10416621  |
| H | -4.72896519 | 0.70490949  | -0.94359582 | H | -4.91644478 | 0.92569906  | -0.81383072 |
| H | 0.90573605  | 2.66031139  | 1.20551019  | H | 1.49109216  | 2.41117905  | 1.38961956  |
| H | 1.40816604  | 3.67916073  | -0.16984507 | H | 2.94914278  | 3.26104024  | 0.79915046  |
| H | 0.13284625  | 2.45201775  | -0.41402399 | H | 1.58508353  | 2.94999688  | -0.31196126 |
| C | 4.37830161  | 1.28137562  | -1.03450566 | C | 4.87711144  | 0.14496712  | -0.45013728 |
| H | 3.46509002  | 3.21572914  | -0.81470621 | H | 4.67095467  | 2.21901164  | 0.04505326  |
| H | 5.03615330  | -0.78259816 | -1.14124666 | H | 4.76753873  | -1.97933605 | -0.88114789 |
| H | -3.41328048 | -3.02353311 | -0.96394854 | H | -2.32679370 | 3.77643796  | -0.01530528 |
| H | -4.59120421 | -1.77045667 | -0.40453507 | H | -3.55812000 | 3.16448734  | -1.18588217 |
| H | -4.01441595 | -1.77301737 | -2.11661412 | H | -3.77957704 | 2.88685405  | 0.58637753  |
| H | -4.64711475 | 2.95886545  | 0.15186580  | H | -5.64432343 | -1.46379695 | -0.58262321 |
| H | 5.31607945  | 1.69357749  | -1.42451572 | H | 5.96028272  | 0.21500429  | -0.60385214 |

③ Four different  $S_1/S_0$  CIs

| <i>ECI(1)-DDIYM</i> |             |             |             | <i>ECI(2)-DDIYM</i> |             |             |             |
|---------------------|-------------|-------------|-------------|---------------------|-------------|-------------|-------------|
| C                   | -0.40199978 | 0.85450789  | 0.12558310  | C                   | 0.53559336  | 0.45019094  | -0.01544494 |
| C                   | -1.56680035 | 0.45550900  | -0.48943964 | C                   | -0.36187710 | 1.24816921  | -0.72795081 |
| C                   | 0.59513357  | 1.73547499  | -0.52764565 | C                   | 1.58874290  | -0.26269164 | -0.78814010 |
| C                   | -2.91930889 | 0.82571977  | 0.09382797  | C                   | -0.07565066 | 2.47650706  | -1.59263855 |
| C                   | -1.80851043 | -0.39255537 | -1.64847086 | C                   | -1.78615960 | 1.03177325  | -0.72890905 |
| C                   | 0.38252308  | -0.18804315 | 0.75536950  | C                   | 1.30064339  | 1.15292030  | 1.03005492  |
| C                   | 0.45450442  | 2.81207718  | -1.38279051 | C                   | 1.52429483  | -0.99492110 | -1.95832848 |
| C                   | 1.87623283  | 1.39289678  | 0.01567610  | C                   | 2.78608371  | -0.25356619 | -0.00220703 |
| C                   | -2.97314495 | 0.02242726  | 1.39089161  | C                   | 0.64440623  | 3.51500750  | -0.75160316 |
| C                   | -3.98168022 | 0.37971243  | -0.91738878 | C                   | -1.43443197 | 2.98022473  | -2.10863258 |
| H                   | -2.95044620 | 1.90973158  | 0.31551842  | H                   | 0.58038523  | 2.14083071  | -2.43066192 |
| C                   | -0.89616758 | -1.11340094 | -2.44901443 | C                   | -2.51743243 | 0.03589996  | -0.04222377 |
| C                   | -3.20614901 | -0.45619217 | -1.89791567 | C                   | -2.43074615 | 2.02674889  | -1.51273486 |
| N                   | 1.72064682  | 0.28965776  | 0.86368163  | N                   | 2.57404731  | 0.52496528  | 1.14180785  |
| O                   | -0.04491477 | -1.22388239 | 1.32516754  | O                   | 0.87283698  | 1.98440242  | 1.85760260  |
| C                   | 1.61106409  | 3.53497255  | -1.71141629 | C                   | 2.67479233  | -1.68753982 | -2.36468657 |
| H                   | -0.51456886 | 3.11329560  | -1.78609693 | H                   | 0.60999117  | -1.04987366 | -2.55428308 |
| C                   | 3.00541145  | 2.12927637  | -0.30819225 | C                   | 3.91370767  | -0.95678732 | -0.40950528 |
| H                   | -2.09661021 | 0.25154937  | 1.99361481  | H                   | 0.05023520  | 3.77768327  | 0.13043451  |
| H                   | -2.99113188 | -1.05597668 | 1.18349898  | H                   | 0.81766500  | 4.41542446  | -1.36125475 |
| H                   | -3.88900338 | 0.30235467  | 1.93191327  | H                   | 1.60750234  | 3.11843629  | -0.41500120 |
| H                   | -4.42815351 | 1.24458795  | -1.44164716 | H                   | -1.49192954 | 2.94829323  | -3.21287894 |
| H                   | -4.77997454 | -0.22209675 | -0.44970160 | H                   | -1.64702279 | 4.00617186  | -1.75722638 |
| C                   | 0.56555775  | -1.10763056 | -2.17658601 | C                   | -1.82132810 | -0.98385012 | 0.78707100  |
| C                   | -1.43072382 | -1.86703558 | -3.50790467 | C                   | -3.91605344 | 0.07395722  | -0.18618054 |
| C                   | -3.71488085 | -1.21110610 | -2.94527059 | C                   | -3.81052301 | 2.03695047  | -1.64501091 |
| C                   | 2.77734986  | -0.54319192 | 1.34479482  | C                   | 3.61288958  | 1.06611814  | 1.96436711  |
| C                   | 2.85639951  | 3.20573376  | -1.19412522 | C                   | 3.84166092  | -1.66848012 | -1.61104293 |
| H                   | 1.51942761  | 4.39160182  | -2.39467796 | H                   | 2.64343739  | -2.26472140 | -3.29823847 |
| H                   | 3.97835525  | 1.87877461  | 0.12443588  | H                   | 4.82068374  | -0.95656109 | 0.20018823  |
| H                   | 0.73597811  | -1.61069509 | -1.22166166 | H                   | -2.23675772 | -0.95706907 | 1.80434026  |
| H                   | 1.10855670  | -1.63859792 | -2.97291256 | H                   | -2.00890438 | -1.97764619 | 0.35344762  |
| H                   | 0.92622511  | -0.07861724 | -2.11373708 | H                   | -0.75438425 | -0.75156092 | 0.78955655  |
| C                   | -2.80306057 | -1.91076089 | -3.74427254 | C                   | -4.53698952 | 1.04537036  | -0.96883548 |
| H                   | -0.75459278 | -2.43222555 | -4.15289181 | H                   | -4.52319594 | -0.67173136 | 0.33050147  |
| H                   | -4.78501231 | -1.26234321 | -3.14025769 | H                   | -4.31928849 | 2.79031785  | -2.24513501 |
| H                   | 3.40833629  | -0.93924890 | 0.50412946  | H                   | 4.36301047  | 1.63998418  | 1.35925640  |
| H                   | 2.35185047  | -1.39850800 | 1.90228681  | H                   | 3.17240103  | 1.74444125  | 2.71867549  |
| H                   | 3.44770664  | 0.03323718  | 2.02722147  | H                   | 4.15644523  | 0.24695629  | 2.49163209  |
| H                   | 3.73526677  | 3.79550353  | -1.47027246 | H                   | 4.71983795  | -2.22525676 | -1.95543381 |
| H                   | -3.18350635 | -2.51488093 | -4.57867012 | H                   | -5.63221553 | 1.04205506  | -1.05812582 |

| <i>ZCI(1)-DDIYM</i> |            |            |             | <i>ZCI(2)-DDIYM</i> |            |             |            |
|---------------------|------------|------------|-------------|---------------------|------------|-------------|------------|
| C                   | 0.65378581 | 0.21134313 | -0.14378377 | C                   | 0.58121907 | -0.38769206 | 0.53648127 |

|   |             |             |             |   |             |             |             |
|---|-------------|-------------|-------------|---|-------------|-------------|-------------|
| C | -0.08203230 | 1.10997533  | -0.91993060 | C | -0.57934883 | -0.68474438 | 1.21084760  |
| C | 1.85923320  | 0.65020345  | 0.60170571  | C | 1.79547655  | 0.20265570  | 1.14311563  |
| C | 0.37450788  | 1.88078693  | -2.15663823 | C | -1.88923993 | -0.01179721 | 0.82393203  |
| C | -1.48930819 | 1.35893869  | -0.74046512 | C | -0.87757523 | -1.66775841 | 2.24202143  |
| C | 1.13669121  | -0.94126279 | -0.92489290 | C | 1.07294916  | -1.45820710 | -0.31038709 |
| C | 2.07882229  | 1.73817522  | 1.42808040  | C | 1.96270810  | 1.15500194  | 2.13147370  |
| C | 2.82076715  | -0.40829212 | 0.53283765  | C | 2.91689201  | -0.28178201 | 0.39403365  |
| C | 1.58297127  | 2.73563424  | -1.83509694 | C | -1.70419406 | 1.49102799  | 0.85493672  |
| C | -0.83437023 | 2.70130822  | -2.63745989 | C | -2.96769218 | -0.53786769 | 1.77753670  |
| H | 0.64452796  | 1.09270377  | -2.90004378 | H | -2.06057557 | -0.35538479 | -0.22150595 |
| C | -2.36005664 | 0.79998690  | 0.22143663  | C | -0.03148848 | -2.61399833 | 2.86037392  |
| C | -1.95322927 | 2.26164452  | -1.73588616 | C | -2.26223811 | -1.61274438 | 2.55714033  |
| N | 2.33870039  | -1.40452281 | -0.32743953 | N | 2.45603293  | -1.21033991 | -0.54749240 |
| O | 0.53454104  | -1.54309553 | -1.83971013 | O | 0.38451774  | -2.30521545 | -0.93332499 |
| C | 3.28217562  | 1.78736786  | 2.14480215  | C | 3.26584549  | 1.60867248  | 2.37978065  |
| H | 1.34207899  | 2.53877744  | 1.52854811  | H | 1.12086677  | 1.56027313  | 2.69634026  |
| C | 4.00135871  | -0.35661301 | 1.26269826  | C | 4.19591359  | 0.18966317  | 0.64433968  |
| H | 1.31124582  | 3.53311729  | -1.12725875 | H | -1.61448256 | 1.84817778  | 1.89385007  |
| H | 1.96058487  | 3.19610710  | -2.75949385 | H | -2.57434005 | 1.97596554  | 0.38979207  |
| H | 2.36884708  | 2.11886931  | -1.39005720 | H | -0.79801432 | 1.73832858  | 0.30281582  |
| H | -1.08631927 | 2.48227721  | -3.69074132 | H | -3.83100619 | -0.96503904 | 1.23775455  |
| H | -0.66318144 | 3.78754574  | -2.51581901 | H | -3.31579887 | 0.25111396  | 2.46832791  |
| C | -1.85328804 | -0.15677701 | 1.24182822  | C | 1.40901618  | -2.72996791 | 2.51006119  |
| C | -3.70963640 | 1.18781131  | 0.14713230  | C | -0.61505018 | -3.47422807 | 3.80561453  |
| C | -3.28953142 | 2.62716927  | -1.78807416 | C | -2.82158798 | -2.47707438 | 3.48755010  |
| C | 3.14353780  | -2.41635695 | -0.94263591 | C | 3.27024534  | -2.15087874 | -1.25106743 |
| C | 4.22336229  | 0.76849342  | 2.06485249  | C | 4.35867149  | 1.14045959  | 1.66229523  |
| H | 3.47780687  | 2.65239088  | 2.79309022  | H | 3.41959194  | 2.36300453  | 3.16531206  |
| H | 4.72490521  | -1.17395320 | 1.21377264  | H | 5.04727105  | -0.16524193 | 0.05611424  |
| H | -2.00129914 | 0.28038787  | 2.24059392  | H | 1.92263135  | -3.40801079 | 3.20794258  |
| H | -2.43340084 | -1.08761275 | 1.17219709  | H | 1.47591604  | -3.13225770 | 1.49593601  |
| H | -0.79534426 | -0.34086717 | 1.04509545  | H | 1.88343578  | -1.74717473 | 2.54065624  |
| C | -4.15375022 | 2.07714600  | -0.83004154 | C | -1.97371896 | -3.40320757 | 4.10598238  |
| H | -4.42137767 | 0.77551501  | 0.86489860  | H | 0.00917334  | -4.21761164 | 4.30576192  |
| H | -3.66193523 | 3.31510052  | -2.54630657 | H | -3.88261632 | -2.44052248 | 3.72973566  |
| H | 3.52451734  | -3.12911518 | -0.17343037 | H | 3.89420002  | -2.76663642 | -0.54867179 |
| H | 2.53721807  | -2.97637355 | -1.67858561 | H | 2.62791628  | -2.82936684 | -1.84289022 |
| H | 4.02936434  | -1.97455644 | -1.46892176 | H | 3.96677222  | -1.61995683 | -1.94379299 |
| H | 5.15031697  | 0.83733854  | 2.64346545  | H | 5.36015219  | 1.51965689  | 1.88379600  |
| H | -5.21598373 | 2.35716771  | -0.85630756 | H | -2.39519040 | -4.09660879 | 4.84598905  |

## (2) Cartesian coordinates for DDPYM

### ① Four ground state local minima geometries

| <i>EM-DDPYM</i> |             |             |             | <i>EP-DDPYM</i> |             |             |             |
|-----------------|-------------|-------------|-------------|-----------------|-------------|-------------|-------------|
| C               | 0.38611437  | 0.86953741  | -0.63940464 | C               | 0.43732512  | 0.51577790  | -0.12233461 |
| C               | -0.92202969 | 0.85470120  | -0.25869627 | C               | -0.91456737 | 0.64836992  | -0.14830423 |
| C               | 1.18738722  | 1.92918097  | -1.24237191 | C               | 1.31013220  | -0.65288922 | -0.17773801 |
| C               | -1.75835302 | -0.40482062 | -0.02359872 | C               | -1.64138564 | 1.97709175  | -0.37385783 |
| C               | -1.80201205 | 1.97157994  | -0.03239994 | C               | -1.94953523 | -0.35166381 | -0.08974446 |
| C               | 1.32968333  | -0.26941595 | -0.42198879 | C               | 1.35440085  | 1.69134380  | 0.01675852  |
| C               | 0.84068197  | 3.10074953  | -1.91064827 | C               | 1.09239697  | -1.97615301 | -0.54722157 |
| C               | 2.54405839  | 1.46340048  | -1.30185075 | C               | 2.65538339  | -0.19250600 | 0.02001495  |
| C               | -1.55125932 | -1.39818321 | -1.15317472 | C               | -1.83167500 | 2.67467628  | 0.96034282  |
| C               | -3.24282814 | 0.05470384  | 0.02760461  | C               | -3.01074600 | 1.59508250  | -1.00036537 |
| H               | -1.45380021 | -0.86210646 | 0.95381446  | H               | -1.04241186 | 2.62723385  | -1.06161429 |
| N               | -1.75704060 | 3.33919476  | 0.20957244  | N               | -2.18229937 | -1.63634676 | 0.38061971  |
| C               | -3.14264292 | 1.53039012  | 0.14396590  | C               | -3.17416647 | 0.17787532  | -0.58439688 |
| N               | 2.62653185  | 0.17974153  | -0.74955867 | N               | 2.66322376  | 1.19912371  | 0.18525459  |
| O               | 1.12440018  | -1.37999178 | 0.08507195  | O               | 1.07938185  | 2.89661370  | 0.06881580  |
| C               | 1.85497353  | 3.85147753  | -2.51572188 | C               | 2.18847645  | -2.84535758 | -0.60217223 |
| H               | -0.20423224 | 3.41237842  | -1.98569774 | H               | 0.09498425  | -2.32245079 | -0.82728711 |
| C               | 3.55019562  | 2.21260828  | -1.91069237 | C               | 3.74415395  | -1.06152791 | -0.03751622 |

|   |             |             |             |   |             |             |             |
|---|-------------|-------------|-------------|---|-------------|-------------|-------------|
| H | -1.70790530 | -0.91137427 | -2.12859096 | H | -2.36763715 | 2.02043904  | 1.66546442  |
| H | -2.27622523 | -2.22203051 | -1.04728256 | H | -2.41782751 | 3.59647258  | 0.81703424  |
| H | -0.54315404 | -1.81552314 | -1.11093952 | H | -0.85477181 | 2.94274368  | 1.37686942  |
| H | -3.77930271 | -0.37936569 | 0.89851793  | H | -2.97394304 | 1.67636046  | -2.11016704 |
| H | -3.77989151 | -0.22758755 | -0.90509040 | H | -3.83670837 | 2.23027877  | -0.61705337 |
| C | -0.59826902 | 4.14310443  | 0.49990263  | C | -1.35014925 | -2.39894467 | 1.27399140  |
| C | -3.05360938 | 3.75116196  | 0.48241664  | C | -3.52161454 | -1.92098280 | 0.14776879  |
| C | -3.93540251 | 2.65593700  | 0.42474504  | C | -4.15285009 | -0.82656841 | -0.47509943 |
| C | 3.81170845  | -0.62121300 | -0.65000527 | C | 3.82637199  | 2.02141152  | 0.35378703  |
| C | 3.18412176  | 3.43186294  | -2.49044048 | C | 3.48108139  | -2.40504015 | -0.32369072 |
| H | 1.59692050  | 4.78633412  | -3.02534075 | H | 2.02553201  | -3.89394499 | -0.87499492 |
| H | 4.58015366  | 1.85307193  | -1.94127254 | H | 4.76155656  | -0.70125313 | 0.12392590  |
| H | -0.66822271 | 4.54831021  | 1.53123919  | H | -1.86318287 | -2.53121106 | 2.24996888  |
| H | -0.52633532 | 5.00175095  | -0.20718066 | H | -1.14007646 | -3.40911661 | 0.85225192  |
| H | 0.32194995  | 3.54113918  | 0.42604763  | H | -0.39423276 | -1.87890070 | 1.45397180  |
| H | -3.31365470 | 4.78649170  | 0.68106245  | H | -3.97357513 | -2.87500262 | 0.40174543  |
| H | -5.00044572 | 2.69093752  | 0.59044722  | H | -5.18521416 | -0.78062358 | -0.77588178 |
| H | 4.57675062  | -0.11882376 | -0.01130937 | H | 3.52289273  | 3.08372247  | 0.40259402  |
| H | 4.26018992  | -0.79810296 | -1.65769416 | H | 4.36377937  | 1.75839171  | 1.29590617  |
| H | 3.55839421  | -1.59837881 | -0.19850408 | H | 4.53393123  | 1.89113934  | -0.50039123 |
| H | 3.95671666  | 4.05464742  | -2.95636435 | H | 4.31378852  | -3.11736607 | -0.35424606 |

| <i>ZM-DDPYM</i> |             |             |             | <i>ZP-DDPYM</i> |             |             |             |
|-----------------|-------------|-------------|-------------|-----------------|-------------|-------------|-------------|
| C               | -0.37082672 | 0.05846486  | 0.08414959  | C               | 0.49728230  | 0.84979845  | 0.02786747  |
| C               | 0.85963030  | -0.53362348 | 0.01171923  | C               | -0.86383350 | 0.89822388  | -0.04056033 |
| C               | -1.68374558 | -0.58135862 | -0.06804085 | C               | 1.46328795  | 0.74009208  | -1.07532974 |
| C               | 1.04505416  | -2.04695547 | 0.17858907  | C               | -1.64592390 | 0.67338970  | -1.34064620 |
| C               | 2.17296556  | 0.01775139  | -0.15684680 | C               | -1.87013649 | 1.05578367  | 0.97450673  |
| C               | -0.67406534 | 1.48086018  | 0.39874088  | C               | 1.32828722  | 0.80951408  | 1.26632050  |
| C               | -2.09569388 | -1.85956053 | -0.43662734 | C               | 1.35323497  | 0.71312128  | -2.46232380 |
| C               | -2.68402811 | 0.43532531  | 0.09203221  | C               | 2.77636885  | 0.68941921  | -0.49839067 |
| C               | 0.48120498  | -2.44824032 | 1.53311608  | C               | -1.79173383 | 2.00988183  | -2.04929872 |
| C               | 2.56098266  | -2.35507877 | 0.12155063  | C               | -3.03837516 | 0.13824580  | -0.92426592 |
| H               | 0.51667359  | -2.58809585 | -0.65552340 | H               | -1.11948648 | -0.07656838 | -1.99330719 |
| N               | 2.83500776  | 1.20435955  | -0.45545156 | N               | -2.07012557 | 1.53681959  | 2.26159673  |
| C               | 3.15913610  | -1.01936950 | -0.10090230 | C               | -3.13932733 | 0.62031621  | 0.47331950  |
| N               | -2.06887020 | 1.65495699  | 0.39398543  | N               | 2.68085061  | 0.72845808  | 0.89699514  |
| O               | 0.07422966  | 2.41401041  | 0.73970735  | O               | 0.99860898  | 0.76910305  | 2.46330124  |
| C               | -3.46092371 | -2.11500078 | -0.60453125 | C               | 2.51504671  | 0.63112970  | -3.23842785 |
| H               | -1.37355033 | -2.66296993 | -0.61270342 | H               | 0.38124214  | 0.75037039  | -2.96169370 |
| C               | -4.04497971 | 0.18110707  | -0.07463104 | C               | 3.93529221  | 0.61452573  | -1.27097625 |
| H               | 1.02868223  | -1.92987533 | 2.33363324  | H               | -2.36864571 | 2.70283265  | -1.42126113 |
| H               | 0.59072994  | -3.53600269 | 1.67287743  | H               | -2.32004930 | 1.87379151  | -3.00632843 |
| H               | -0.58070444 | -2.18587806 | 1.61366424  | H               | -0.80725362 | 2.45723139  | -2.24803322 |
| H               | 2.81231808  | -3.04326152 | -0.71581156 | H               | -3.06107565 | -0.97431297 | -0.95860127 |
| H               | 2.92320312  | -2.80194920 | 1.07298137  | H               | -3.85316885 | 0.53792430  | -1.56448238 |
| C               | 2.28045833  | 2.49706378  | -0.77750080 | C               | -1.14846599 | 2.26372865  | 3.10210978  |
| C               | 4.17927155  | 0.92270126  | -0.55317731 | C               | -3.40786211 | 1.38857635  | 2.56067877  |
| C               | 4.41726695  | -0.44939108 | -0.33079157 | C               | -4.09592438 | 0.80164967  | 1.47520503  |
| C               | -2.73525442 | 2.88363542  | 0.71756133  | C               | 3.76968784  | 0.61241998  | 1.82486366  |
| C               | -4.41923167 | -1.12117484 | -0.41367124 | C               | 3.78118175  | 0.58299426  | -2.65801703 |
| H               | -3.78288900 | -3.12325004 | -0.88745821 | H               | 2.42421989  | 0.60520512  | -4.33017604 |
| H               | -4.78412440 | 0.97377001  | 0.05403590  | H               | 4.92062960  | 0.58113822  | -0.80284529 |
| H               | 3.07723203  | 3.27054188  | -0.72728424 | H               | -1.56662443 | 2.35280151  | 4.12772355  |
| H               | 1.88238873  | 2.48211300  | -1.81848673 | H               | -0.18031421 | 1.74656949  | 3.14394642  |
| H               | 1.47081901  | 2.75467238  | -0.08025547 | H               | -1.00783331 | 3.29238556  | 2.69767492  |
| H               | 4.93061725  | 1.68390552  | -0.74847620 | H               | -3.83404534 | 1.67606849  | 3.51850194  |
| H               | 5.37684412  | -0.93854708 | -0.33463832 | H               | -5.14521117 | 0.55926321  | 1.45040229  |
| H               | -1.98401285 | 3.65372434  | 0.97377173  | H               | 3.37463766  | 0.60037402  | 2.85773423  |
| H               | -3.34035540 | 3.24664441  | -0.14852318 | H               | 4.33984776  | -0.33007160 | 1.64957349  |
| H               | -3.41779496 | 2.74610044  | 1.58853402  | H               | 4.47257944  | 1.47329190  | 1.71913782  |
| H               | -5.48168827 | -1.36098901 | -0.53409523 | H               | 4.66944455  | 0.51878676  | -3.29669404 |

② Two transition state geometries at ground state

| <i>EM-EP-TS-DDPYM</i> |             |             |             | <i>ZM-ZP-TS-DDPYM</i> |             |             |             |
|-----------------------|-------------|-------------|-------------|-----------------------|-------------|-------------|-------------|
| C                     | -0.44164071 | -0.39200982 | 0.09434349  | C                     | -0.38322781 | 0.08433324  | 0.03889728  |
| C                     | 0.91824653  | -0.52653310 | 0.05554172  | C                     | 0.83794095  | -0.52328392 | -0.00201357 |
| C                     | -1.41655599 | 0.70400383  | 0.06389390  | C                     | -1.71038493 | -0.54616958 | -0.08879357 |
| C                     | 1.52532322  | -1.94366702 | 0.01785902  | C                     | 0.96357376  | -2.05250939 | 0.06651982  |
| C                     | 2.05824110  | 0.37186743  | -0.03516473 | C                     | 2.18795128  | -0.02417395 | -0.09473510 |
| C                     | -1.29142814 | -1.63555743 | -0.00073071 | C                     | -0.67662522 | 1.54235597  | 0.18190733  |
| C                     | -1.34622833 | 2.08204963  | 0.22227166  | C                     | -2.16353139 | -1.85647536 | -0.21579027 |
| C                     | -2.72194246 | 0.13329149  | -0.13032150 | C                     | -2.68748939 | 0.50429572  | -0.13575149 |
| C                     | 1.60376426  | -2.41325949 | 1.46321016  | C                     | 0.61367878  | -2.47314560 | 1.48631818  |
| C                     | 2.93802903  | -1.82226407 | -0.58845274 | C                     | 2.42429238  | -2.43456716 | -0.25369984 |
| H                     | 0.90877100  | -2.64209439 | -0.58833067 | H                     | 0.27733554  | -2.53074757 | -0.68619275 |
| N                     | 2.46218435  | 1.71002586  | 0.02807451  | N                     | 2.94651086  | 1.14180310  | -0.13678744 |
| C                     | 3.20054476  | -0.37239826 | -0.46473523 | C                     | 3.10256557  | -1.12038145 | -0.22172491 |
| N                     | -2.63068017 | -1.25827655 | -0.19002134 | N                     | -2.05881006 | 1.74376459  | 0.01939483  |
| O                     | -0.97719600 | -2.83265985 | 0.04024496  | O                     | 0.06877680  | 2.49613246  | 0.44046289  |
| C                     | -2.51246691 | 2.85589519  | 0.18323642  | C                     | -3.53022937 | -2.09976281 | -0.39810105 |
| H                     | -0.39415191 | 2.57293512  | 0.39815276  | H                     | -1.48146536 | -2.71081775 | -0.18401014 |
| C                     | -3.88572532 | 0.89894900  | -0.19198164 | C                     | -4.04905926 | 0.26561378  | -0.31919001 |
| H                     | 2.19309669  | -1.71094002 | 2.07448626  | H                     | 1.35718553  | -2.06782248 | 2.18775009  |
| H                     | 2.08279476  | -3.40548710 | 1.49757810  | H                     | 0.61581610  | -3.57276889 | 1.56274093  |
| H                     | 0.59378422  | -2.50119863 | 1.88251943  | H                     | -0.37643591 | -2.09850126 | 1.77700925  |
| H                     | 2.94538685  | -2.13179946 | -1.65760808 | H                     | 2.51500741  | -2.89141893 | -1.26491273 |
| H                     | 3.69095647  | -2.42214146 | -0.03494791 | H                     | 2.84840927  | -3.13621939 | 0.49589327  |
| C                     | 1.81113051  | 2.87114771  | 0.56655267  | C                     | 2.54415623  | 2.52996694  | -0.10195462 |
| C                     | 3.79765452  | 1.77815043  | -0.33675593 | C                     | 4.27163893  | 0.78351811  | -0.26734613 |
| C                     | 4.28087785  | 0.50187229  | -0.66699055 | C                     | 4.40460733  | -0.61628830 | -0.32953187 |
| C                     | -3.70592693 | -2.17610552 | -0.43153357 | C                     | -2.71706217 | 3.00760282  | 0.18607116  |
| C                     | -3.76029215 | 2.28182364  | -0.03827221 | C                     | -4.45834225 | -1.06299826 | -0.44869982 |
| H                     | -2.43605485 | 3.93996569  | 0.32275720  | H                     | -3.87533648 | -3.13480255 | -0.49800075 |
| H                     | -4.85723577 | 0.42708701  | -0.34953603 | H                     | -4.76165853 | 1.09113277  | -0.36108020 |
| H                     | 1.22909796  | 2.60508049  | 1.47060291  | H                     | 3.44548403  | 3.18295957  | -0.13289043 |
| H                     | 2.56494576  | 3.62794829  | 0.86718862  | H                     | 1.91160389  | 2.76386482  | -0.98188655 |
| H                     | 1.15295292  | 3.34582659  | -0.20144576 | H                     | 1.96696690  | 2.74815580  | 0.81029448  |
| H                     | 4.36152449  | 2.70784634  | -0.34556355 | H                     | 5.08059689  | 1.51018247  | -0.29570875 |
| H                     | 5.27918135  | 0.25767192  | -0.98356138 | H                     | 5.32386866  | -1.16757004 | -0.42675339 |
| H                     | -3.33188586 | -3.21310973 | -0.33747405 | H                     | -1.96037693 | 3.80831212  | 0.28269820  |
| H                     | -4.53044348 | -2.02318980 | 0.30548852  | H                     | -3.36844682 | 3.23287959  | -0.69226762 |
| H                     | -4.12389270 | -2.03641216 | -1.45841250 | H                     | -3.35398254 | 3.00572437  | 1.10279419  |
| H                     | -4.65318928 | 2.91473939  | -0.08894144 | H                     | -5.52188014 | -1.28939993 | -0.58430073 |

③ Two different  $S_1/S_0$  CIs

| <i>ECl-DDPYM</i> |             |             | <i>ZCl-DDPYM</i> |   |             |             |             |
|------------------|-------------|-------------|------------------|---|-------------|-------------|-------------|
| C                | 0.58966701  | -0.32482539 | 0.46980547       | C | 0.95735588  | 1.36266930  | 0.83544622  |
| C                | -0.77335904 | -0.59532698 | 0.64626241       | C | -0.25579804 | 1.77406612  | 1.40269422  |
| C                | 1.51886259  | -0.93162791 | -0.45252071      | C | 1.64659643  | 1.88534918  | -0.31915227 |
| C                | -1.93999648 | 0.01717748  | -0.12362822      | C | -1.65593204 | 1.30950997  | 1.01158562  |
| C                | -1.32564979 | -1.48198443 | 1.58774415       | C | -0.40834656 | 2.67466926  | 2.47167925  |
| C                | 1.27846478  | 0.78685269  | 1.11058346       | C | 1.66764494  | 0.16280969  | 1.25712122  |
| C                | 1.41518593  | -2.00085394 | -1.33394235      | C | 1.42142263  | 2.98506066  | -1.13851179 |
| C                | 2.76646842  | -0.22132413 | -0.32195720      | C | 2.78847367  | 1.03565098  | -0.54873762 |
| C                | -1.91481889 | 1.51948149  | 0.09358535       | C | -1.88510273 | 1.57507399  | -0.46402056 |
| C                | -3.24385806 | -0.62719481 | 0.42380130       | C | -2.66531163 | 2.07937989  | 1.90742739  |
| H                | -1.80850493 | -0.21918589 | -1.21481784      | H | -1.70622836 | 0.20723048  | 1.21730164  |
| N                | -0.90918028 | -2.35300617 | 2.58911832       | N | 0.37515847  | 3.45332487  | 3.31694647  |
| C                | -2.76089115 | -1.55093354 | 1.48515432       | C | -1.79436085 | 2.89145754  | 2.79912207  |
| N                | 2.61324366  | 0.78679675  | 0.63299260       | N | 2.79915350  | 0.02450158  | 0.41511864  |
| O                | 0.86258328  | 1.58689700  | 1.97121815       | O | 1.42166536  | -0.60897392 | 2.20412185  |
| C                | 2.54494059  | -2.34849377 | -2.08110311      | C | 2.32287945  | 3.22436197  | -2.18017035 |
| H                | 0.47803114  | -2.55344137 | -1.44277921      | H | 0.56279742  | 3.64218651  | -0.97529065 |

|   |             |             |             |   |             |             |             |
|---|-------------|-------------|-------------|---|-------------|-------------|-------------|
| C | 3.88251278  | -0.58148457 | -1.07057556 | C | 3.67814792  | 1.28899982  | -1.58816577 |
| H | -1.99328010 | 1.75214151  | 1.16280389  | H | -1.85541941 | 2.65660945  | -0.66922522 |
| H | -2.75395822 | 1.98800132  | -0.44533856 | H | -2.86878165 | 1.18336044  | -0.76599837 |
| H | -0.97113684 | 1.93253896  | -0.28134794 | H | -1.10502599 | 1.08161140  | -1.05501429 |
| H | -3.78245474 | -1.18943832 | -0.36748503 | H | -3.29222761 | 1.38534690  | 2.50353305  |
| H | -3.92287476 | 0.13429725  | 0.85780231  | H | -3.32242973 | 2.73991122  | 1.30425894  |
| C | 0.45801500  | -2.53490528 | 3.01546441  | C | 1.81834595  | 3.47887791  | 3.32247563  |
| C | -2.03201125 | -2.94662803 | 3.09987508  | C | -0.47750161 | 4.12996104  | 4.14758438  |
| C | -3.20040153 | -2.47357207 | 2.43049511  | C | -1.83479520 | 3.80635014  | 3.84769811  |
| C | 3.57451835  | 1.78601674  | 0.98101678  | C | 3.69457229  | -1.08835058 | 0.47581683  |
| C | 3.74898648  | -1.65533526 | -1.95281890 | C | 3.42411068  | 2.39605677  | -2.39987114 |
| H | 2.48188530  | -3.18652801 | -2.78667788 | H | 2.15945251  | 4.08460145  | -2.84149181 |
| H | 4.82590620  | -0.04044302 | -0.96751206 | H | 4.54206927  | 0.64227959  | -1.75761315 |
| H | 0.58442055  | -2.17991594 | 4.06051756  | H | 2.20573090  | 3.06739723  | 4.27882119  |
| H | 0.73919424  | -3.60955942 | 2.96628158  | H | 2.19978561  | 2.86529342  | 2.49005732  |
| H | 1.12737473  | -1.95574746 | 2.35874049  | H | 2.18781021  | 4.52139027  | 3.20607668  |
| H | -2.01303149 | -3.68368723 | 3.89984784  | H | -0.14497315 | 4.82431576  | 4.91618693  |
| H | -4.20766450 | -2.78374840 | 2.64687286  | H | -2.69455500 | 4.20287961  | 4.35878262  |
| H | 3.14272517  | 2.46755916  | 1.73664008  | H | 3.41937285  | -1.73863533 | 1.32620651  |
| H | 4.49502753  | 1.31776502  | 1.40326591  | H | 3.65067388  | -1.68799499 | -0.46439187 |
| H | 3.87207488  | 2.38314922  | 0.08623122  | H | 4.74596332  | -0.74151419 | 0.61356688  |
| H | 4.61129002  | -1.95817680 | -2.55743916 | H | 4.10699843  | 2.61724714  | -3.22790804 |

# 11. Cartesian coordinates for several structures of DDIYM and DDPYM optimized with the B3LYP-D3/6-31G(d,p) method

Unit of the Cartesian coordinate below is angstrom.

## (1) Cartesian coordinates for DDIYM

### ① Four ground state local minima geometries

| <i>EM</i> -DDIYM |             |             |             | <i>EP</i> -DDIYM |             |             |             |
|------------------|-------------|-------------|-------------|------------------|-------------|-------------|-------------|
| C                | 0.76680500  | -0.84563800 | -0.05120400 | C                | -0.72297700 | 0.77658200  | -0.07822600 |
| C                | -0.57308000 | -0.56189200 | -0.06904300 | C                | 0.61968500  | 0.54635700  | -0.04911100 |
| C                | -1.28070400 | 0.66689700  | 0.29275400  | C                | 1.40554400  | -0.68070300 | -0.19235300 |
| C                | -2.66123500 | 0.44025100  | 0.07903000  | C                | 2.76956100  | -0.32201900 | -0.06617300 |
| N                | -2.84435600 | -0.84100800 | -0.43562400 | N                | 2.87186800  | 1.05198000  | 0.15196400  |
| C                | -1.63137700 | -1.52690600 | -0.51807000 | C                | 1.61730600  | 1.65832900  | 0.10572200  |
| C                | 1.87260400  | 0.11466500  | -0.15420900 | C                | -1.83129500 | -0.18251100 | 0.01465100  |
| C                | 3.03714800  | -0.46106000 | 0.40343300  | C                | -2.92741700 | 0.34148200  | -0.70912900 |
| C                | 2.74258300  | -1.85061000 | 0.88839400  | C                | -2.58640700 | 1.70940700  | -1.24791000 |
| C                | 1.38805600  | -2.22417100 | 0.20899100  | C                | -1.34749200 | 2.13169300  | -0.40260900 |
| C                | -0.88356000 | 1.84856500  | 0.91981800  | C                | 1.08784900  | -1.98653600 | -0.56459100 |
| C                | -1.84544500 | 2.80881700  | 1.25365600  | C                | 2.11223400  | -2.92812900 | -0.72075700 |
| C                | -3.19865700 | 2.58426900  | 0.98577800  | C                | 3.44737000  | -2.56579100 | -0.52737600 |
| C                | -3.62755700 | 1.38447300  | 0.40404200  | C                | 3.79636500  | -1.24650500 | -0.21040300 |
| C                | 1.95892700  | 1.34105100  | -0.85989900 | C                | -1.98155700 | -1.34855500 | 0.79701400  |
| C                | 3.19374300  | 2.00564100  | -0.83111600 | C                | -3.20036700 | -2.03483900 | 0.68585000  |
| C                | 4.31182700  | 1.47494100  | -0.18642900 | C                | -4.24154700 | -1.57029100 | -0.11885400 |
| C                | 4.24854200  | 0.21375100  | 0.41305500  | C                | -4.12278300 | -0.35547200 | -0.80286700 |
| C                | 0.59745000  | -3.20963700 | 1.07306700  | C                | -1.74610700 | 2.89623900  | 0.87110100  |
| O                | -1.51697100 | -2.65451200 | -0.98578000 | O                | 1.43018800  | 2.86381400  | 0.23139500  |
| H                | -3.93272800 | 3.34128900  | 1.24511000  | H                | 4.23052900  | -3.30901500 | -0.64386700 |
| H                | 2.60847600  | -1.86164800 | 1.97885200  | H                | -3.42044400 | 2.41355600  | -1.16048700 |
| H                | 3.54236900  | -2.56147100 | 0.65761100  | H                | -2.31414600 | 1.65510800  | -2.31027600 |
| H                | 1.60621700  | -2.68907300 | -0.76315400 | H                | -0.65307100 | 2.75033700  | -0.97163900 |
| H                | -0.26979500 | -3.60304300 | 0.54822700  | H                | -0.85354000 | 3.13045100  | 1.45447500  |
| H                | 0.26107800  | -2.72172200 | 1.99479000  | H                | -2.43384600 | 2.30440100  | 1.48483400  |
| H                | 1.24701500  | -4.04584600 | 1.35434000  | H                | -2.24309600 | 3.83590000  | 0.60788300  |
| H                | 0.16358100  | 2.01991400  | 1.14621400  | H                | 0.05700200  | -2.26534000 | -0.75069500 |
| H                | -1.53536100 | 3.73464600  | 1.72802300  | H                | 1.86408900  | -3.94738600 | -0.99990800 |
| H                | -4.68040600 | 1.19294100  | 0.22514700  | H                | 4.83482900  | -0.95234700 | -0.10012000 |
| H                | 5.13204700  | -0.23748100 | 0.85544200  | H                | -4.95741800 | 0.04579000  | -1.37066400 |
| C                | -4.10938900 | -1.41297900 | -0.83630400 | C                | 4.10652900  | 1.78748100  | 0.30454400  |
| H                | -4.57718500 | -0.81010300 | -1.62259000 | H                | 4.74481700  | 1.66876400  | -0.57879800 |
| H                | -3.90804100 | -2.41469900 | -1.21788700 | H                | 3.84641000  | 2.83983400  | 0.42540800  |
| H                | -4.79757400 | -1.47767500 | 0.01443200  | H                | 4.65821900  | 1.44374100  | 1.18644700  |
| C                | 0.85322100  | 1.89976500  | -1.71824100 | C                | -0.96703000 | -1.80175100 | 1.81780000  |
| H                | 1.27797700  | 2.43545800  | -2.57213300 | H                | -0.34953700 | -2.63072900 | 1.45700700  |
| H                | 0.20059300  | 1.10714100  | -2.09133100 | H                | -0.28502500 | -0.99336300 | 2.08778700  |
| H                | 0.21307400  | 2.59905300  | -1.17065900 | H                | -1.47849000 | -2.14344100 | 2.72295900  |
| H                | 5.24798300  | 2.02591100  | -0.19589500 | H                | -5.16971900 | -2.13239500 | -0.17067700 |
| H                | 3.28753400  | 2.94839700  | -1.36394100 | H                | -3.34691300 | -2.93504000 | 1.27750300  |

| <i>ZM</i> -DDIYM |             |             |             | <i>ZP</i> -DDIYM |             |             |             |
|------------------|-------------|-------------|-------------|------------------|-------------|-------------|-------------|
| C                | 0.70504100  | -0.62498300 | 0.01660500  | C                | 0.63343100  | -0.57673100 | -0.03125300 |
| C                | -0.51626800 | 0.00091400  | 0.04710400  | C                | -0.58739200 | 0.03253300  | -0.01218900 |
| C                | -1.84363700 | -0.52784400 | -0.26353600 | C                | -1.92303600 | -0.57154400 | 0.06489700  |
| C                | -2.78992000 | 0.47008100  | 0.07405100  | C                | -2.86575700 | 0.46917900  | -0.12377300 |
| N                | -2.12790300 | 1.56530400  | 0.61879200  | N                | -2.19577000 | 1.66956100  | -0.34315000 |

|   |             |             |             |   |             |             |             |
|---|-------------|-------------|-------------|---|-------------|-------------|-------------|
| C | -0.74328300 | 1.37027800  | 0.61312000  | C | -0.81254500 | 1.48874500  | -0.30143700 |
| C | 2.02920200  | -0.01689000 | -0.12199300 | C | 1.97970900  | 0.01012000  | 0.00468400  |
| C | 3.01306600  | -0.96055000 | 0.26050700  | C | 2.84942500  | -0.85354500 | -0.70302200 |
| C | 2.37750200  | -2.25369300 | 0.67924000  | C | 2.10016200  | -2.07174600 | -1.18381000 |
| C | 0.89760900  | -2.13647300 | 0.21129100  | C | 0.82400500  | -2.06758500 | -0.29334200 |
| C | -2.28722700 | -1.67369100 | -0.92686900 | C | -2.39730800 | -1.85611600 | 0.33723800  |
| C | -3.65333200 | -1.84328100 | -1.17651400 | C | -3.77717200 | -2.09078400 | 0.38308200  |
| C | -4.57349000 | -0.86395300 | -0.79148000 | C | -4.68469400 | -1.05040900 | 0.17531900  |
| C | -4.14964300 | 0.31731000  | -0.17019000 | C | -4.23697700 | 0.25261500  | -0.07565100 |
| C | 2.42913100  | 1.20446800  | -0.72649400 | C | 2.49664700  | 1.11650100  | 0.71432200  |
| C | 3.80532100  | 1.46537300  | -0.78453900 | C | 3.86615400  | 1.38080800  | 0.56469400  |
| C | 4.76069700  | 0.56488000  | -0.31388600 | C | 4.69927600  | 0.58040000  | -0.21684500 |
| C | 4.36788000  | -0.67725800 | 0.19045400  | C | 4.19818600  | -0.56634900 | -0.84175300 |
| C | -0.03762200 | -2.80402400 | 1.22892000  | C | 1.05130900  | -2.85976300 | 1.00784000  |
| O | 0.05505800  | 2.16142300  | 1.10081200  | O | -0.00521400 | 2.37266400  | -0.55757700 |
| H | -5.63122400 | -1.01088800 | -0.98845200 | H | -5.75173200 | -1.24801600 | 0.21518700  |
| H | 2.40464700  | -2.36356000 | 1.77150400  | H | 2.68328300  | -2.99340200 | -1.08526700 |
| H | 2.88813600  | -3.12750800 | 0.26123600  | H | 1.81924800  | -1.97061300 | -2.24005800 |
| H | 0.80236400  | -2.63730700 | -0.76367000 | H | -0.03330600 | -2.48026200 | -0.83117800 |
| H | -1.08151600 | -2.81777500 | 0.92039400  | H | 0.20517100  | -2.75865400 | 1.69354800  |
| H | 0.01927800  | -2.27738000 | 2.18705700  | H | 1.94457000  | -2.49243100 | 1.52281600  |
| H | 0.28071100  | -3.83900800 | 1.39292300  | H | 1.19394200  | -3.92313300 | 0.78916100  |
| H | -1.57908100 | -2.42789400 | -1.25348400 | H | -1.71388100 | -2.67531600 | 0.52180600  |
| H | -3.99919200 | -2.74136000 | -1.67859200 | H | -4.14162800 | -3.09260400 | 0.58761800  |
| H | -4.85787500 | 1.09235700  | 0.10348800  | H | -4.93754300 | 1.06719100  | -0.22612000 |
| H | 5.10487000  | -1.41284300 | 0.49985200  | H | 4.85386100  | -1.22946900 | -1.39885000 |
| C | -2.75928800 | 2.75228500  | 1.14803600  | C | -2.82145500 | 2.93280500  | -0.66073600 |
| H | -3.44405500 | 2.49857500  | 1.96500500  | H | -3.46343000 | 3.26903400  | 0.16139900  |
| H | -1.96792800 | 3.40053400  | 1.52641900  | H | -2.02458700 | 3.65993000  | -0.82143900 |
| H | -3.32160500 | 3.27874500  | 0.36808600  | H | -3.42797300 | 2.85065700  | -1.56988100 |
| C | 1.49237700  | 2.17724500  | -1.38729200 | C | 1.69308200  | 1.94042200  | 1.68351100  |
| H | 1.99418600  | 2.67729700  | -2.22093900 | H | 1.32238900  | 2.85110000  | 1.20688700  |
| H | 0.59862300  | 1.67504200  | -1.76909900 | H | 0.81839000  | 1.39155800  | 2.04211100  |
| H | 1.14899300  | 2.93248600  | -0.67555800 | H | 2.30878400  | 2.21684900  | 2.54531700  |
| H | 5.81545000  | 0.81571300  | -0.38301800 | H | 5.75399700  | 0.82675200  | -0.30139200 |
| H | 4.13538100  | 2.39508600  | -1.24039900 | H | 4.29223500  | 2.22524900  | 1.10034500  |

② Two transition state geometries at ground state

| <i>EM-EP-TS-DDIYM</i> |             |             | <i>ZM-ZP-TS-DDIYM</i> |   |             |             |             |
|-----------------------|-------------|-------------|-----------------------|---|-------------|-------------|-------------|
| C                     | 0.73908300  | -0.59491000 | 0.39677400            | C | 0.65966000  | -0.41819400 | 0.11516400  |
| C                     | -0.63217700 | -0.47652500 | 0.35700700            | C | -0.59746800 | 0.14132500  | 0.19307100  |
| C                     | -1.59699800 | 0.63928300  | 0.26275400            | C | -1.89943100 | -0.57766500 | 0.03134500  |
| C                     | -2.76599900 | 0.14633800  | -0.36859800           | C | -2.88047700 | 0.40233700  | -0.27193500 |
| N                     | -2.63076000 | -1.21771500 | -0.59668500           | N | -2.31979800 | 1.67142900  | -0.18850400 |
| C                     | -1.47011200 | -1.70771200 | -0.00106800           | C | -1.01193500 | 1.59142800  | 0.28585100  |
| C                     | 1.89577000  | 0.28661500  | 0.00005300            | C | 2.08671700  | 0.04193000  | -0.05704600 |
| C                     | 2.90224000  | -0.58186300 | -0.50341600           | C | 2.86223900  | -1.10826600 | -0.38146900 |
| C                     | 2.54987200  | -2.02798900 | -0.31346000           | C | 2.04059000  | -2.35128400 | -0.49386900 |
| C                     | 1.36969100  | -1.96753600 | 0.66189800            | C | 0.71320000  | -1.95223500 | 0.14689400  |
| C                     | -1.68363300 | 1.90605800  | 0.83963800            | C | -2.34933400 | -1.90221800 | 0.11918900  |
| C                     | -2.81024900 | 2.70996900  | 0.62825100            | C | -3.68720300 | -2.22313600 | -0.14996500 |
| C                     | -3.89162900 | 2.23831300  | -0.11583700           | C | -4.60587500 | -1.23663100 | -0.49771300 |
| C                     | -3.89366200 | 0.92540400  | -0.59865300           | C | -4.20721100 | 0.10309800  | -0.55038000 |
| C                     | 2.17027800  | 1.67879200  | -0.01173300           | C | 2.79275000  | 1.28611700  | 0.01042700  |
| C                     | 3.35997400  | 2.11679700  | -0.61127000           | C | 4.17890800  | 1.26989000  | -0.21299000 |
| C                     | 4.29475600  | 1.24754300  | -1.16940600           | C | 4.90538500  | 0.12127800  | -0.51383200 |
| C                     | 4.07227300  | -0.12255900 | -1.09514000           | C | 4.23251200  | -1.08781600 | -0.60661500 |
| C                     | 1.82664300  | -2.02757800 | 2.13473300            | C | 0.62489400  | -2.44245800 | 1.60642700  |
| O                     | -1.24652300 | -2.90883900 | 0.08809400            | O | -0.43658200 | 2.55880000  | 0.75641100  |
| H                     | -4.75758200 | 2.87212300  | -0.28171500           | H | -5.63844900 | -1.49938000 | -0.70671200 |
| H                     | 3.39562800  | -2.61374300 | 0.06308200            | H | 2.51022200  | -3.21140600 | -0.00396700 |
| H                     | 2.23886900  | -2.48060300 | -1.26430700           | H | 1.90614400  | -2.62036900 | -1.54982300 |
| H                     | 0.66142300  | -2.77256600 | 0.49509200            | H | -0.10859600 | -2.36879300 | -0.43257800 |
| H                     | 0.97482300  | -1.90019700 | 2.80902800            | H | -0.26570500 | -2.05629900 | 2.10834000  |

|   |             |             |             |   |             |             |             |
|---|-------------|-------------|-------------|---|-------------|-------------|-------------|
| H | 2.56242800  | -1.24717000 | 2.35857800  | H | 1.50130000  | -2.10104900 | 2.16718900  |
| H | 2.28469400  | -3.00030500 | 2.34200300  | H | 0.60106000  | -3.53710300 | 1.64357200  |
| H | -0.90621700 | 2.26196400  | 1.49366800  | H | -1.70262900 | -2.70526400 | 0.43809300  |
| H | -2.84633800 | 3.70069200  | 1.07044400  | H | -4.00544900 | -3.25787600 | -0.07055700 |
| H | -4.76005200 | 0.51488900  | -1.10601300 | H | -4.91419200 | 0.89098100  | -0.78649800 |
| H | 4.80148700  | -0.83257400 | -1.47494100 | H | 4.75357000  | -2.01000400 | -0.84763700 |
| C | -3.68928000 | -2.07863000 | -1.07845000 | C | -3.08343500 | 2.90029000  | -0.16055000 |
| H | -3.96902600 | -1.80294500 | -2.10024300 | H | -3.85504300 | 2.86739900  | 0.61845300  |
| H | -3.31482400 | -3.10202400 | -1.06412400 | H | -2.39129900 | 3.71422900  | 0.05498800  |
| H | -4.57685200 | -2.00714700 | -0.43791000 | H | -3.56620400 | 3.07306200  | -1.12772300 |
| C | 1.33088900  | 2.74162100  | 0.64393300  | C | 2.22390200  | 2.64822100  | 0.29999100  |
| H | 0.45891700  | 3.00584200  | 0.04328300  | H | 1.50566600  | 2.95824600  | -0.45934700 |
| H | 0.98668400  | 2.41537900  | 1.62802100  | H | 1.69193800  | 2.67766800  | 1.24810900  |
| H | 1.92043500  | 3.65072900  | 0.78913600  | H | 3.03078300  | 3.38516700  | 0.32341900  |
| H | 5.20062700  | 1.64018100  | -1.62196300 | H | 5.97809500  | 0.17953000  | -0.67392300 |
| H | 3.56600400  | 3.18362100  | -0.61712400 | H | 4.70970600  | 2.21478600  | -0.14713000 |

## (2) Cartesian coordinates for DDPYM

### ① Four ground state local minima geometries

| <i>EM-DDPYM</i> |             |             |             | <i>EP-DDPYM</i> |             |             |             |
|-----------------|-------------|-------------|-------------|-----------------|-------------|-------------|-------------|
| C               | -0.98678700 | 0.64481400  | 0.01947800  | C               | -0.92973900 | 0.64184600  | -0.11585800 |
| C               | 0.38349200  | 0.52862200  | -0.02096800 | C               | 0.43377800  | 0.52974800  | -0.06324300 |
| C               | 1.27187100  | 1.64429200  | -0.44809100 | C               | 1.33282000  | 1.71408900  | 0.05972200  |
| C               | -3.23861400 | 1.60780000  | 0.44549600  | C               | -3.01652400 | 1.47100300  | -1.10268800 |
| C               | -1.72576700 | 1.97903000  | 0.25084200  | C               | -1.68954600 | 1.94786300  | -0.40987600 |
| C               | -1.18504400 | 2.76485500  | 1.45440600  | C               | -1.98678900 | 2.72012400  | 0.88773500  |
| O               | 0.99489600  | 2.79797000  | -0.76879600 | O               | 1.05914200  | 2.91001400  | 0.11917700  |
| H               | -3.54936200 | 1.82576200  | 1.47525700  | H               | -3.86824800 | 2.10958000  | -0.84505000 |
| H               | -3.89767600 | 2.19045100  | -0.20846800 | H               | -2.90785000 | 1.50110100  | -2.19454700 |
| H               | -1.59295600 | 2.59505800  | -0.64617400 | H               | -1.09247400 | 2.58791700  | -1.06159400 |
| H               | -0.15390900 | 3.07519100  | 1.29247900  | H               | -1.05486900 | 2.99833400  | 1.38163000  |
| H               | -1.24011000 | 2.15757100  | 2.36471600  | H               | -2.59254700 | 2.10955500  | 1.56655000  |
| H               | -1.78977200 | 3.66470800  | 1.61054600  | H               | -2.54275700 | 3.63604300  | 0.66144600  |
| C               | -3.46254000 | -1.97932900 | -0.51816600 | C               | -3.43298100 | -1.99890000 | 0.21634800  |
| C               | -3.28522900 | 0.14785400  | 0.13405800  | C               | -3.15416100 | 0.06652900  | -0.59528800 |
| C               | -2.00579800 | -0.35084200 | -0.10379400 | C               | -1.95833600 | -0.35577900 | -0.02719000 |
| H               | -5.28747700 | -0.85893700 | -0.00998400 | H               | -5.11272200 | -1.01746900 | -0.81095600 |
| C               | -1.13140300 | -2.46729600 | -1.24580400 | C               | -1.33327600 | -2.25380100 | 1.53808200  |
| H               | -1.59413600 | -2.90207400 | -2.13488100 | H               | -1.10460900 | -3.29273800 | 1.28595800  |
| H               | -0.30814000 | -1.82590600 | -1.55422900 | H               | -0.39712700 | -1.71156800 | 1.64801700  |
| H               | -0.72644400 | -3.26779300 | -0.62220500 | H               | -1.87391300 | -2.22329900 | 2.48905900  |
| H               | -3.79120300 | -2.95540500 | -0.84808100 | H               | -3.80882500 | -2.94829600 | 0.57260900  |
| N               | 2.56408500  | 1.10647400  | -0.51621300 | N               | 2.63361000  | 1.20897000  | 0.15007400  |
| C               | 3.72272800  | 1.87611100  | -0.90555100 | C               | 3.80372200  | 2.04642000  | 0.27734500  |
| H               | 4.22376000  | 1.42063500  | -1.76706100 | H               | 4.45651500  | 1.94586600  | -0.59790500 |
| H               | 3.37423800  | 2.87437900  | -1.17393200 | H               | 3.45844900  | 3.07823200  | 0.35502300  |
| H               | 4.44083800  | 1.95030700  | -0.08021200 | H               | 4.37590300  | 1.78375100  | 1.17415000  |
| C               | 2.15015200  | -2.68360600 | 1.10503600  | C               | 2.19949400  | -2.84561800 | -0.57883600 |
| C               | 3.43967800  | -2.29521600 | 0.72969800  | C               | 3.49942500  | -2.37594200 | -0.37516100 |
| C               | 3.67416100  | -1.03793800 | 0.15722800  | C               | 3.73911700  | -1.02243700 | -0.10494300 |
| C               | 2.58091900  | -0.20673700 | -0.05647000 | C               | 2.64272300  | -0.17340800 | -0.01619800 |
| C               | 1.25666500  | -0.60766200 | 0.25242500  | C               | 1.31075000  | -0.63846600 | -0.15506400 |
| C               | 1.05829800  | -1.83689000 | 0.88240100  | C               | 1.10374000  | -1.97959900 | -0.48170400 |
| H               | 1.99425500  | -3.64541200 | 1.58415800  | H               | 2.03528400  | -3.89046200 | -0.82412500 |
| H               | 4.27702200  | -2.96425900 | 0.90421300  | H               | 4.33905300  | -3.06075900 | -0.44791300 |
| H               | 4.67936600  | -0.71581100 | -0.09450700 | H               | 4.74951300  | -0.64475600 | 0.01261500  |
| H               | 0.06494500  | -2.12312400 | 1.21245300  | H               | 0.10331800  | -2.34482900 | -0.68360800 |
| N               | -2.12372800 | -1.66814700 | -0.53230400 | N               | -2.13201900 | -1.63167200 | 0.48527300  |
| C               | -4.21093400 | -0.88576000 | -0.10123800 | C               | -4.08861200 | -0.98324000 | -0.46688400 |



| <i>ZM-DDPYM</i> |             |             |             | <i>ZP-DDPYM</i> |             |             |             |
|-----------------|-------------|-------------|-------------|-----------------|-------------|-------------|-------------|
| C               | 0.87767500  | -0.55276000 | 0.02154200  | C               | 0.81784400  | -0.52256200 | -0.07457800 |
| C               | -0.36782400 | 0.03819600  | 0.01815000  | C               | -0.42595700 | 0.05203800  | -0.01321100 |
| C               | -0.62820600 | 1.43184100  | 0.46607300  | C               | -0.67537900 | 1.50870100  | -0.20333100 |
| C               | 2.64504500  | -2.27425700 | 0.37746500  | C               | 2.42561900  | -2.11575400 | -1.03024400 |
| C               | 1.09750900  | -2.06763700 | 0.23049800  | C               | 1.04333400  | -2.02641300 | -0.29931700 |
| C               | 0.34763800  | -2.61023000 | 1.45685000  | C               | 1.09558800  | -2.77958000 | 1.04433400  |
| O               | 0.14703000  | 2.27619200  | 0.91099800  | O               | 0.11891300  | 2.42277100  | -0.40791700 |
| H               | 2.88474700  | -2.61369700 | 1.39309200  | H               | 2.98498500  | -3.01420100 | -0.74721100 |
| H               | 3.02846900  | -3.04116800 | -0.30565800 | H               | 2.27951300  | -2.15356500 | -2.11737900 |
| H               | 0.75538400  | -2.59902100 | -0.66708000 | H               | 0.24320500  | -2.43704900 | -0.92169500 |
| H               | -0.73136300 | -2.47382400 | 1.38077600  | H               | 0.19702800  | -2.60757200 | 1.64246600  |
| H               | 0.68990800  | -2.09357800 | 2.35947600  | H               | 1.95689500  | -2.43727600 | 1.62708600  |
| H               | 0.55157000  | -3.67924700 | 1.57907000  | H               | 1.19931900  | -3.85693600 | 0.87810000  |
| C               | 4.12184100  | 1.00749700  | -0.54105000 | C               | 4.14276400  | 0.98428000  | 0.11444200  |
| C               | 3.20200800  | -0.92227100 | 0.08197300  | C               | 3.08261300  | -0.84184300 | -0.59785700 |
| C               | 2.18199200  | 0.01716700  | -0.10297500 | C               | 2.14240200  | 0.03673500  | -0.05325400 |
| H               | 5.42580800  | -0.71928400 | -0.11911600 | H               | 5.30121200  | -0.62234000 | -0.85279300 |
| C               | 2.12429600  | 2.39457700  | -1.06467700 | C               | 2.31566400  | 2.22498300  | 1.26388500  |
| H               | 1.22100700  | 2.09765800  | -1.59986800 | H               | 2.05404300  | 3.11089900  | 0.68723300  |
| H               | 1.83534500  | 3.08836100  | -0.27773800 | H               | 1.41728500  | 1.88123300  | 1.77409700  |
| H               | 2.81461500  | 2.86472000  | -1.76849200 | H               | 3.08237700  | 2.45891000  | 2.00705500  |
| H               | 4.77781400  | 1.80834300  | -0.85335900 | H               | 4.86097700  | 1.73474200  | 0.14455000  |
| N               | -2.01411200 | 1.61021300  | 0.41669000  | N               | -2.06021600 | 1.67744000  | -0.20346200 |
| C               | -2.67508300 | 2.81829800  | 0.85180600  | C               | -2.70596800 | 2.94833400  | -0.43571900 |
| H               | -3.34539600 | 2.61675300  | 1.69544200  | H               | -3.34538000 | 3.22374400  | 0.41080900  |
| H               | -1.89987100 | 3.51855800  | 1.16568900  | H               | -1.92071500 | 3.69546100  | -0.55768100 |
| H               | -3.26034800 | 3.26050500  | 0.03722200  | H               | -3.32033300 | 2.91508300  | -1.34298400 |
| C               | -3.47231600 | -2.01644200 | -0.95197200 | C               | -3.58540000 | -2.14698300 | 0.23467200  |
| C               | -4.41151900 | -1.01475400 | -0.69461000 | C               | -4.50952600 | -1.10694000 | 0.12536800  |
| C               | -4.00709800 | 0.24174400  | -0.22651300 | C               | -4.07819900 | 0.21733800  | -0.02186100 |
| C               | -2.65014000 | 0.45063200  | -0.01408300 | C               | -2.71065700 | 0.45494600  | -0.06118700 |
| C               | -1.67797300 | -0.55623700 | -0.24386800 | C               | -1.74761500 | -0.58211200 | 0.04191400  |
| C               | -2.10777800 | -1.79138400 | -0.73595600 | C               | -2.20853300 | -1.89202800 | 0.19832200  |
| H               | -3.80143500 | -2.98198600 | -1.32366500 | H               | -3.93373600 | -3.16864400 | 0.35124500  |
| H               | -5.46696900 | -1.20664300 | -0.86301900 | H               | -5.57355300 | -1.32153200 | 0.15624600  |
| H               | -4.72953100 | 1.02911700  | -0.03777500 | H               | -4.78893300 | 1.03299900  | -0.10507600 |
| H               | -1.39611400 | -2.58062300 | -0.95027500 | H               | -1.51951800 | -2.72075600 | 0.29368800  |
| N               | 2.76798000  | 1.20657900  | -0.51557200 | N               | 2.81382400  | 1.15834100  | 0.40205700  |
| C               | 4.43210800  | -0.29765000 | -0.16874300 | C               | 4.34786500  | -0.23744500 | -0.51980900 |

② Two transition state geometries at ground state

| <i>EM-EP-TS-DDPYM</i> |             |             |             | <i>ZM-ZP-TS-DDPYM</i> |             |             |             |
|-----------------------|-------------|-------------|-------------|-----------------------|-------------|-------------|-------------|
| C                     | 0.92322200  | -0.53676600 | 0.06290100  | C                     | 0.84013200  | -0.47032400 | -0.00786300 |
| C                     | -0.45480300 | -0.42408700 | 0.11960100  | C                     | -0.41684700 | 0.09838600  | 0.02031500  |
| C                     | -1.31718100 | -1.66225000 | -0.01704100 | C                     | -0.71982800 | 1.54710200  | 0.17039200  |
| C                     | 2.96936500  | -1.81443000 | -0.56184400 | C                     | 2.40790600  | -2.39046500 | -0.30887500 |
| C                     | 1.56376500  | -1.95283600 | 0.06935900  | C                     | 0.95225400  | -2.01003000 | 0.06067300  |
| C                     | 1.64043600  | -2.48299500 | 1.51266400  | C                     | 0.60064800  | -2.50313100 | 1.47749600  |
| O                     | -1.03828300 | -2.85675800 | 0.05737300  | O                     | 0.02896000  | 2.49324000  | 0.39601400  |
| H                     | 3.72197100  | -2.41070000 | -0.03355600 | H                     | 2.82610900  | -3.12967500 | 0.38412300  |
| H                     | 2.96924800  | -2.15427600 | -1.60577700 | H                     | 2.46765300  | -2.83060800 | -1.31259200 |
| H                     | 0.94649700  | -2.64266200 | -0.50066000 | H                     | 0.26698800  | -2.45248100 | -0.66463100 |
| H                     | 0.64323600  | -2.54812900 | 1.95000600  | H                     | -0.38753700 | -2.16557500 | 1.79564600  |
| H                     | 2.26460800  | -1.82838300 | 2.13187100  | H                     | 1.33736600  | -2.11890500 | -2.19088600 |
| H                     | 2.08049500  | -3.48568400 | 1.52012900  | H                     | 0.62388500  | -3.59734400 | 1.51850800  |
| C                     | 3.78196300  | 1.78446200  | -0.38306400 | C                     | 4.30314900  | 0.77645900  | -0.29371300 |
| C                     | 3.21598100  | -0.35458100 | -0.46523000 | C                     | 3.10077600  | -1.07799700 | -0.25170500 |
| C                     | 2.07187800  | 0.35861100  | -0.07952300 | C                     | 2.21341900  | 0.00202600  | -0.08977200 |
| H                     | 5.29427100  | 0.30229200  | -0.97797400 | H                     | 5.32052300  | -1.16494300 | -0.51786200 |
| C                     | 1.77346300  | 2.88962400  | 0.46161400  | C                     | 2.67723300  | 2.58357600  | -0.01484400 |
| H                     | 2.51711600  | 3.67256500  | 0.61851300  | H                     | 1.97128200  | 2.88757600  | -0.78362500 |
| H                     | 1.03411600  | 3.25590700  | -0.25281500 | H                     | 2.23495900  | 2.80878400  | 0.95218600  |

|   |             |             |             |   |             |             |             |
|---|-------------|-------------|-------------|---|-------------|-------------|-------------|
| H | 1.29699700  | 2.68714200  | 1.42297400  | H | 3.61213100  | 3.13448400  | -0.13463300 |
| H | 4.27887400  | 2.74463900  | -0.38222700 | H | 5.07910600  | 1.52749200  | -0.34079300 |
| N | -2.61171100 | -1.22668600 | -0.28339000 | N | -2.09873900 | 1.69412600  | 0.05903800  |
| C | -3.72903300 | -2.12507300 | -0.46496700 | C | -2.77654500 | 2.96258000  | 0.18949400  |
| H | -4.21969500 | -1.94263000 | -1.42732100 | H | -3.46528200 | 2.95188200  | 1.04230500  |
| H | -3.33803800 | -3.14243600 | -0.44119300 | H | -2.01359400 | 3.72532000  | 0.34848100  |
| H | -4.46771400 | -1.99902800 | 0.33558800  | H | -3.34529900 | 3.19677400  | -0.71759800 |
| C | -2.51508000 | 2.85751000  | 0.27760600  | C | -3.56969500 | -2.13995500 | -0.37409500 |
| C | -3.74545800 | 2.30050800  | -0.06727000 | C | -4.50285600 | -1.10455500 | -0.37036600 |
| C | -3.85267100 | 0.92334700  | -0.28582500 | C | -4.07928700 | 0.22120800  | -0.22936500 |
| C | -2.70196100 | 0.15152800  | -0.18078800 | C | -2.71801000 | 0.46158700  | -0.09846400 |
| C | -1.42050900 | 0.69237100  | 0.10542000  | C | -1.73578000 | -0.56467100 | -0.10322100 |
| C | -1.36917500 | 2.05842400  | 0.37472900  | C | -2.19977800 | -1.87940200 | -0.23998700 |
| H | -2.43996400 | 3.91987200  | 0.48941300  | H | -3.90263700 | -3.16838200 | -0.47529700 |
| H | -4.62839400 | 2.92791900  | -0.14347700 | H | -5.56161600 | -1.32308600 | -0.47163800 |
| H | -4.80779600 | 0.46364400  | -0.51670500 | H | -4.79017200 | 1.04085700  | -0.22046200 |
| H | -0.45628000 | 2.51289300  | 0.70288500  | H | -1.52565300 | -2.72347600 | -0.23016100 |
| N | 2.45569200  | 1.70585100  | -0.02933200 | N | 2.99871600  | 1.16150600  | -0.12867300 |
| C | 4.28393800  | 0.53112700  | -0.67161000 | C | 4.40981800  | -0.60139900 | -0.37668500 |

## 12. Cartesian coordinates for several structures of DDIYM and DDPYM optimized with the $\omega$ B97X-D/6-31G(d,p) method

Unit of the Cartesian coordinate below is angstrom.

### (1) Cartesian coordinates for DDIYM

#### ① Four ground state local minima geometries

| <i>EM</i> -DDIYM |             |             |             | <i>EP</i> -DDIYM |             |             |             |
|------------------|-------------|-------------|-------------|------------------|-------------|-------------|-------------|
| C                | 0.75586500  | 0.85984500  | 0.06839600  | C                | -0.71456300 | 0.78713900  | -0.06287900 |
| C                | -0.57243400 | 0.56947900  | 0.07461600  | C                | 0.61866700  | 0.55564300  | -0.05107700 |
| C                | -1.26473100 | -0.67437200 | -0.28060200 | C                | 1.39937100  | -0.67821400 | -0.18901400 |
| C                | -2.64166400 | -0.45538400 | -0.09193000 | C                | 2.75695100  | -0.32457900 | -0.07064700 |
| N                | -2.84509200 | 0.82918800  | 0.40001100  | N                | 2.86765500  | 1.04839200  | 0.13420400  |
| C                | -1.64852300 | 1.52456500  | 0.49629000  | C                | 1.62450600  | 1.65963000  | 0.08861400  |
| C                | 1.86408900  | -0.10643100 | 0.15901300  | C                | -1.82529600 | -0.17755700 | 0.01669300  |
| C                | 3.01244500  | 0.46279000  | -0.41824300 | C                | -2.90771800 | 0.35176400  | -0.70947400 |
| C                | 2.71496300  | 1.85483500  | -0.88868400 | C                | -2.56714900 | 1.72739500  | -1.22210800 |
| C                | 1.38564700  | 2.23169100  | -0.17575000 | C                | -1.34526100 | 2.13974500  | -0.35941700 |
| C                | -0.84970200 | -1.85534800 | -0.88489800 | C                | 1.07451400  | -1.98127300 | -0.54377500 |
| C                | -1.79705800 | -2.82507800 | -1.21696200 | C                | 2.09143300  | -2.92691400 | -0.68833200 |
| C                | -3.15052300 | -2.60814300 | -0.97087800 | C                | 3.42377400  | -2.56871000 | -0.50192400 |
| C                | -3.59524600 | -1.40789200 | -0.41387800 | C                | 3.77789000  | -1.25115000 | -0.20431000 |
| C                | 1.95465200  | -1.32245100 | 0.86534100  | C                | -1.97909000 | -1.34606400 | 0.78074500  |
| C                | 3.18201300  | -1.99282300 | 0.81612200  | C                | -3.19079500 | -2.03416000 | 0.64660200  |
| C                | 4.28596800  | -1.47089700 | 0.15045900  | C                | -4.22025500 | -1.56401600 | -0.16146000 |
| C                | 4.21821200  | -0.21507100 | -0.44950600 | C                | -4.09814600 | -0.34371700 | -0.82552800 |
| C                | 0.59602700  | 3.24033900  | -1.00516100 | C                | -1.75921000 | 2.86668700  | 0.92468700  |
| O                | -1.55520900 | 2.65051600  | 0.95756900  | O                | 1.44721400  | 2.86183800  | 0.20272400  |
| H                | -3.87481600 | -3.37335300 | -1.23073200 | H                | 4.20273700  | -3.31675400 | -0.60905500 |
| H                | 2.55490800  | 1.87368500  | -1.97451200 | H                | -3.40377600 | 2.42652300  | -1.12820200 |
| H                | 3.52208300  | 2.55927800  | -0.66817500 | H                | -2.28560300 | 1.68968600  | -2.28141800 |
| H                | 1.62980000  | 2.67358600  | 0.79969000  | H                | -0.65172500 | 2.77553800  | -0.90912000 |
| H                | -0.24889200 | 3.64506200  | -0.45323100 | H                | -0.87280900 | 3.10291400  | 1.51669400  |
| H                | 0.22433200  | 2.77015300  | -1.92209900 | H                | -2.43810700 | 2.25182000  | 1.52490800  |
| H                | 1.25758200  | 4.06324700  | -1.29475600 | H                | -2.26897100 | 3.80362500  | 0.68082200  |
| H                | 0.20163000  | -2.02367900 | -1.09454100 | H                | 0.04171300  | -2.25802200 | -0.72370800 |
| H                | -1.47367900 | -3.75385700 | -1.67476100 | H                | 1.83992000  | -3.94862500 | -0.95226300 |
| H                | -4.65175500 | -1.22291300 | -0.25165200 | H                | 4.81791600  | -0.96180600 | -0.09725700 |
| H                | 5.09575200  | 0.23120800  | -0.90702600 | H                | -4.92778100 | 0.06323400  | -1.39539700 |
| C                | -4.11721600 | 1.38732900  | 0.77850700  | C                | 4.10425700  | 1.77374300  | 0.26974600  |
| H                | -4.58175200 | 0.79436400  | 1.57314200  | H                | 4.72804500  | 1.65503600  | -0.62280000 |
| H                | -3.93248900 | 2.39800400  | 1.14347800  | H                | 3.85164700  | 2.82692000  | 0.39615700  |
| H                | -4.79814300 | 1.42815900  | -0.07835000 | H                | 4.66401100  | 1.42710600  | 1.14422000  |
| C                | 0.86475900  | -1.87277700 | 1.74552000  | C                | -0.97913400 | -1.81282700 | 1.80666900  |
| H                | 1.30750100  | -2.36314700 | 2.61636700  | H                | -0.41731300 | -2.68961700 | 1.47105900  |
| H                | 0.19432000  | -1.08392500 | 2.09257900  | H                | -0.25273100 | -1.03454300 | 2.04481300  |
| H                | 0.24553100  | -2.60925600 | 1.22457900  | H                | -1.50193000 | -2.08994700 | 2.72653000  |
| H                | 5.21949200  | -2.02513000 | 0.14467000  | H                | -5.14572900 | -2.12730600 | -0.23127000 |
| H                | 3.28063500  | -2.93517100 | 1.34806600  | H                | -3.33928800 | -2.94461100 | 1.22118300  |

| <i>ZM</i> -DDIYM |             |             |             | <i>ZP</i> -DDIYM |             |             |             |
|------------------|-------------|-------------|-------------|------------------|-------------|-------------|-------------|
| C                | 0.69801700  | 0.62079200  | -0.01013900 | C                | -0.62479500 | 0.56916500  | -0.01257500 |
| C                | -0.51098100 | -0.00754400 | -0.03858900 | C                | 0.58465800  | -0.04206700 | 0.01015900  |
| C                | -1.84286900 | 0.52365200  | 0.26359900  | C                | 1.92161800  | 0.56582200  | 0.07627600  |
| C                | -2.77991900 | -0.46953900 | -0.07814400 | C                | 2.85768500  | -0.46685500 | -0.12834700 |
| N                | -2.11661900 | -1.56549900 | -0.61332300 | N                | 2.19009400  | -1.66806300 | -0.33557400 |

|   |             |             |             |   |             |             |             |
|---|-------------|-------------|-------------|---|-------------|-------------|-------------|
| C | -0.73910800 | -1.37787100 | -0.59663500 | C | 0.81427500  | -1.49639600 | -0.27288100 |
| C | 2.03004200  | 0.01695300  | 0.11855000  | C | -1.97844400 | -0.01026800 | 0.00505800  |
| C | 2.99855700  | 0.95992800  | -0.27445700 | C | -2.82144400 | 0.85238100  | -0.72045700 |
| C | 2.35487600  | 2.25024300  | -0.68176000 | C | -2.05735200 | 2.06490700  | -1.18507200 |
| C | 0.88632500  | 2.12922600  | -0.19795600 | C | -0.80845000 | 2.05722500  | -0.26804300 |
| C | -2.28589000 | 1.66194300  | 0.92843000  | C | 2.39240300  | 1.84518700  | 0.35065800  |
| C | -3.65005800 | 1.83248600  | 1.16616200  | C | 3.76838700  | 2.08317000  | 0.37486700  |
| C | -4.56454100 | 0.85930500  | 0.76980200  | C | 4.67166600  | 1.05046100  | 0.14483400  |
| C | -4.13829900 | -0.31760900 | 0.15237100  | C | 4.22524800  | -0.24873000 | -0.10399100 |
| C | 2.43489300  | -1.19167400 | 0.72617200  | C | -2.51159400 | -1.10214400 | 0.71034000  |
| C | 3.80905800  | -1.44740200 | 0.77603500  | C | -3.87643700 | -1.35828600 | 0.53745400  |
| C | 4.75294000  | -0.54890300 | 0.29223400  | C | -4.68533500 | -0.55984400 | -0.26325400 |
| C | 4.35258300  | 0.68428800  | -0.21546300 | C | -4.16655000 | 0.57592900  | -0.88335600 |
| C | -0.05477700 | 2.79415100  | -1.20526400 | C | -1.06484300 | 2.83449300  | 1.02975700  |
| O | 0.05492900  | -2.17046700 | -1.07447800 | O | 0.01234200  | -2.38270600 | -0.50964300 |
| H | -5.62309800 | 1.00785200  | 0.95713100  | H | 5.73803700  | 1.25078900  | 0.16787000  |
| H | 2.37011800  | 2.36449900  | -1.77279900 | H | -2.63788200 | 2.98843500  | -1.09720400 |
| H | 2.86582300  | 3.12176800  | -0.26206100 | H | -1.75492500 | 1.95972300  | -2.23360700 |
| H | 0.79924500  | 2.62549800  | 0.77891500  | H | 0.05965900  | 2.47229400  | -0.78506100 |
| H | -1.09573600 | 2.81569500  | -0.88747300 | H | -0.23503200 | 2.72589200  | 1.73392600  |
| H | -0.00910800 | 2.26407700  | -2.16152400 | H | -1.96985100 | 2.46386000  | 1.52080000  |
| H | 0.26721900  | 3.82625800  | -1.37550700 | H | -1.20122100 | 3.89925700  | 0.81818100  |
| H | -1.57984700 | 2.41317600  | 1.26685700  | H | 1.70961900  | 2.66054800  | 0.55714500  |
| H | -3.99932800 | 2.72819600  | 1.66852900  | H | 4.13395800  | 3.08372800  | 0.57975200  |
| H | -4.84583600 | -1.09045400 | -0.12841500 | H | 4.92690800  | -1.05917300 | -0.27010300 |
| H | 5.08370300  | 1.42096600  | -0.53377300 | H | -4.80660200 | 1.23927800  | -1.45692400 |
| C | -2.74530500 | -2.74685900 | -1.14437100 | C | 2.81530500  | -2.92287200 | -0.66385600 |
| H | -3.42476200 | -2.49114700 | -1.96390400 | H | 3.49654900  | -3.23955100 | 0.13263600  |
| H | -1.95224800 | -3.39423900 | -1.51991800 | H | 2.02147600  | -3.66164200 | -0.77786200 |
| H | -3.30852100 | -3.27473200 | -0.36715400 | H | 3.37545800  | -2.84709500 | -1.60194500 |
| C | 1.50707000  | -2.16164700 | 1.39793000  | C | -1.73040500 | -1.92406000 | 1.69524100  |
| H | 2.01603200  | -2.64767800 | 2.23454000  | H | -1.35012200 | -2.83270100 | 1.22442000  |
| H | 0.61279100  | -1.66078300 | 1.77947300  | H | -0.86575100 | -1.37354700 | 2.07486900  |
| H | 1.16992600  | -2.92460000 | 0.69299500  | H | -2.36606500 | -2.19919000 | -2.54172300 |
| H | 5.80885200  | -0.79319900 | 0.35675900  | H | -5.73934800 | -0.79863200 | -0.36737100 |
| H | 4.14600100  | -2.37243500 | 1.23536700  | H | -4.31783100 | -2.19749900 | 1.06803100  |

② Two transition state geometries at ground state

| <i>EM-EP-TS-DDIYM</i> |             |             | <i>ZM-ZP-TS-DDIYM</i> |   |             |             |             |
|-----------------------|-------------|-------------|-----------------------|---|-------------|-------------|-------------|
| C                     | 0.73653100  | -0.60303300 | 0.37321600            | C | 0.65337900  | -0.41847900 | 0.11640700  |
| C                     | -0.62538200 | -0.47704700 | 0.36094600            | C | -0.59123900 | 0.14109500  | 0.20694600  |
| C                     | -1.58969900 | 0.64367000  | 0.26674000            | C | -1.89478500 | -0.57627900 | 0.04292900  |
| C                     | -2.74184300 | 0.15647300  | -0.38279900           | C | -2.86142100 | 0.40017900  | -0.28107800 |
| N                     | -2.60941400 | -1.20653200 | -0.60860900           | N | -2.29865300 | 1.66740300  | -0.20547400 |
| C                     | -1.47406600 | -1.69887000 | 0.01781000            | C | -1.00886700 | 1.58782200  | 0.29738900  |
| C                     | 1.89820600  | 0.28664500  | -0.00303000           | C | 2.08378900  | 0.04096000  | -0.05660200 |
| C                     | 2.90820800  | -0.56732200 | -0.50006800           | C | 2.85051400  | -1.10227700 | -0.38843800 |
| C                     | 2.55943200  | -2.01494800 | -0.34535800           | C | 2.02705700  | -2.34098500 | -0.51411900 |
| C                     | 1.36139200  | -1.98027500 | 0.59993100            | C | 0.70610600  | -1.94767800 | 0.13324700  |
| C                     | -1.68895200 | 1.89515600  | 0.86194700            | C | -2.34541400 | -1.89283000 | 0.14703700  |
| C                     | -2.80995400 | 2.69801100  | 0.64078500            | C | -3.67893400 | -2.21099900 | -0.12780600 |
| C                     | -3.87111000 | 2.23665600  | -0.12930600           | C | -4.58603600 | -1.22874100 | -0.49766000 |
| C                     | -3.86323700 | 0.93350500  | -0.62582800           | C | -4.18321000 | 0.10495200  | -0.56627800 |
| C                     | 2.16128100  | 1.67518800  | -0.00005800           | C | 2.78139300  | 1.28013500  | 0.01581500  |
| C                     | 3.35874300  | 2.12521800  | -0.56391300           | C | 4.16456500  | 1.26784800  | -0.20040100 |
| C                     | 4.30739900  | 1.26831400  | -1.10747300           | C | 4.88902100  | 0.12350200  | -0.50265600 |
| C                     | 4.08756600  | -0.09821300 | -1.05878100           | C | 4.21892400  | -1.08129600 | -0.60833000 |
| C                     | 1.77970100  | -2.09376800 | 2.07461700            | C | 0.62518600  | -2.44830700 | 1.58383200  |
| O                     | -1.27412200 | -2.89460600 | 0.14576600            | O | -0.44636400 | 2.54675600  | 0.78581800  |
| H                     | -4.73437100 | 2.87100200  | -0.30262800           | H | -5.61772400 | -1.48916900 | -0.71028000 |
| H                     | 3.39771600  | -2.60023200 | 0.04585400            | H | 2.49432200  | -3.20602700 | -0.03274800 |
| H                     | 2.27859600  | -2.45059100 | -1.31174600           | H | 1.89035300  | -2.59331300 | -1.57231400 |
| H                     | 0.65451300  | -2.77636000 | 0.39015000            | H | -0.11906500 | -2.35468600 | -0.44823700 |
| H                     | 0.90906500  | -2.00063500 | 2.72896600            | H | -0.25509400 | -2.05456900 | 2.09787900  |

|   |             |             |             |   |             |             |             |
|---|-------------|-------------|-------------|---|-------------|-------------|-------------|
| H | 2.50336800  | -1.31820300 | 2.34793800  | H | 1.51070800  | -2.12398100 | 2.13986100  |
| H | 2.24007100  | -3.06984700 | 2.25491600  | H | 0.58673500  | -3.54221600 | 1.61099700  |
| H | -0.92616400 | 2.24223300  | 1.53885800  | H | -1.70227500 | -2.69285400 | 0.48339300  |
| H | -2.85850200 | 3.68036700  | 1.09827900  | H | -4.00311000 | -3.24201800 | -0.03466800 |
| H | -4.72120800 | 0.52785800  | -1.15069500 | H | -4.88642600 | 0.89039500  | -0.82063300 |
| H | 4.82501300  | -0.80107500 | -1.43448500 | H | 4.74061400  | -2.00107600 | -0.85477900 |
| C | -3.67107100 | -2.06256800 | -1.07648100 | C | -3.06134600 | 2.89093000  | -0.17904700 |
| H | -3.92239500 | -1.82771700 | -2.11489300 | H | -3.84054700 | 2.85362100  | 0.59095300  |
| H | -3.31385500 | -3.08998100 | -1.01099500 | H | -2.37054500 | 3.70160500  | 0.05139500  |
| H | -4.56873400 | -1.95096200 | -0.45756500 | H | -3.52940900 | 3.07129200  | -1.15105900 |
| C | 1.29185600  | 2.72573900  | 0.62697700  | C | 2.20269700  | 2.63698600  | 0.29544700  |
| H | 0.40420500  | 2.93072600  | 0.02805000  | H | 1.47473100  | 2.92889400  | -0.46071700 |
| H | 0.97771600  | 2.42086300  | 1.62766500  | H | 1.68253600  | 2.67158500  | 1.24943300  |
| H | 1.84697700  | 3.66082400  | 0.73045500  | H | 3.00240600  | 3.38098600  | 0.30070100  |
| H | 5.22051100  | 1.66991400  | -1.53523100 | H | 5.96163500  | 0.18327100  | -0.65785600 |
| H | 3.55634400  | 3.19320000  | -0.55801100 | H | 4.69335600  | 2.21316000  | -0.12935200 |

## (2) Cartesian coordinates for DDPYM

### ① Four ground state local minima geometries

| <i>EM-DDPYM</i> |             |             |             | <i>EP-DDPYM</i> |             |             |             |
|-----------------|-------------|-------------|-------------|-----------------|-------------|-------------|-------------|
| C               | -0.98155500 | 0.65705300  | 0.01461800  | C               | -0.92157200 | 0.64658400  | -0.10661300 |
| C               | 0.37910600  | 0.54083400  | -0.01651500 | C               | 0.43203800  | 0.53108800  | -0.06190700 |
| C               | 1.28090400  | 1.64588300  | -0.43679100 | C               | 1.33636500  | 1.71059700  | 0.05082700  |
| C               | -3.22925800 | 1.59083400  | 0.46745600  | C               | -2.99252500 | 1.48318500  | -1.09452000 |
| C               | -1.73296900 | 1.97973100  | 0.23284800  | C               | -1.67978500 | 1.94950200  | -0.38480800 |
| C               | -1.18458800 | 2.79950300  | 1.40315600  | C               | -1.98708000 | 2.69350400  | 0.92090200  |
| O               | 1.01881600  | 2.79582100  | -0.76066400 | O               | 1.06795000  | 2.90179200  | 0.10479300  |
| H               | -3.50694400 | 1.79298300  | 1.50867700  | H               | -3.84527800 | 2.11692600  | -0.83155600 |
| H               | -3.91084000 | 2.17165200  | -0.16190400 | H               | -2.87425900 | 1.52719900  | -2.18335300 |
| H               | -1.63451100 | 2.57494800  | -0.68229700 | H               | -1.07775700 | 2.60128100  | -1.01933100 |
| H               | -0.16732500 | 3.13512400  | 1.20734300  | H               | -1.05894000 | 2.95750200  | 1.43013200  |
| H               | -1.19995300 | 2.20836800  | 2.32494300  | H               | -2.60263200 | 2.07300300  | 1.58101000  |
| H               | -1.81031700 | 3.68417100  | 1.55742000  | H               | -2.53411500 | 3.61658000  | 0.70697200  |
| C               | -3.43312000 | -1.97947600 | -0.52067100 | C               | -3.42779500 | -1.98562000 | 0.18992700  |
| C               | -3.26654900 | 0.13504400  | 0.14646200  | C               | -3.13401600 | 0.07506800  | -0.60501100 |
| C               | -1.99615900 | -0.35128900 | -0.10299700 | C               | -1.95608800 | -0.35310300 | -0.02866400 |
| H               | -5.26115400 | -0.88533100 | 0.01021700  | H               | -5.09227100 | -1.00231900 | -0.84759900 |
| C               | -1.11132000 | -2.44006400 | -1.26310000 | C               | -1.35157300 | -2.25195000 | 1.52625300  |
| H               | -1.57932200 | -2.88335700 | -2.14404900 | H               | -1.15472500 | -3.29950400 | 1.28538100  |
| H               | -0.30360900 | -1.78535100 | -1.58622400 | H               | -0.39922600 | -1.73564200 | 1.62632000  |
| H               | -0.68523600 | -3.23143200 | -0.64292600 | H               | -1.88480900 | -2.19414600 | 2.47910900  |
| H               | -3.75530100 | -2.95588800 | -0.85552000 | H               | -3.80918500 | -2.93600700 | 0.53703400  |
| N               | 2.55928100  | 1.09750700  | -0.50118300 | N               | 2.62716800  | 1.20395400  | 0.14097500  |
| C               | 3.72137500  | 1.85138300  | -0.89302300 | C               | 3.79631700  | 2.03602600  | 0.25666800  |
| H               | 4.20385300  | 1.40046500  | -1.76630800 | H               | 4.44098100  | 1.93400500  | -0.62323100 |
| H               | 3.38332900  | 2.85712800  | -1.14535100 | H               | 3.45150000  | 3.06770700  | 0.33415600  |
| H               | 4.44813000  | 1.90654700  | -0.07516500 | H               | 4.37185900  | 1.77677300  | 1.15122200  |
| C               | 2.11340600  | -2.68204600 | 1.10448800  | C               | 2.19049000  | -2.84330000 | -0.55781800 |
| C               | 3.40193000  | -2.30446100 | 0.73275800  | C               | 3.48604600  | -2.37344600 | -0.36072400 |
| C               | 3.64719800  | -1.05207200 | 0.16540400  | C               | 3.72645400  | -1.02263100 | -0.10192500 |
| C               | 2.56287600  | -0.21531300 | -0.04684000 | C               | 2.63225900  | -0.17697300 | -0.01728000 |
| C               | 1.24303900  | -0.60573900 | 0.25561900  | C               | 1.30771900  | -0.64127200 | -0.14890400 |
| C               | 1.03208600  | -1.82777000 | 0.88284700  | C               | 1.09801500  | -1.97840700 | -0.46603300 |
| H               | 1.94996600  | -3.64239300 | 1.58231400  | H               | 2.02605100  | -3.88952200 | -0.79337100 |
| H               | 4.23246900  | -2.98068000 | 0.90823300  | H               | 4.32407600  | -3.05959800 | -0.42988000 |
| H               | 4.65594800  | -0.73846300 | -0.08229200 | H               | 4.73695300  | -0.64438600 | 0.01169800  |
| H               | 0.03582700  | -2.10609300 | 1.21244300  | H               | 0.09700100  | -2.34603100 | -0.66314500 |
| N               | -2.10327400 | -1.65843300 | -0.54122400 | N               | -2.13506300 | -1.62414800 | 0.47386000  |
| C               | -4.18600000 | -0.90244900 | -0.09028400 | C               | -4.07252900 | -0.97165500 | -0.49266200 |

| <i>ZM-DDPYM</i> |             |             |             | <i>ZP-DDPYM</i> |             |             |             |
|-----------------|-------------|-------------|-------------|-----------------|-------------|-------------|-------------|
| C               | 0.86995500  | -0.54763600 | 0.01647600  | C               | 0.81094400  | -0.51592800 | -0.07338300 |
| C               | -0.36464800 | 0.04322500  | 0.01325600  | C               | -0.42271100 | 0.05726000  | -0.01254100 |
| C               | -0.62728600 | 1.43763700  | 0.44906000  | C               | -0.67779900 | 1.51104700  | -0.19622900 |
| C               | 2.61883200  | -2.27975900 | 0.35919100  | C               | 2.40168600  | -2.11426900 | -1.02560800 |
| C               | 1.08089000  | -2.05994400 | 0.21443700  | C               | 1.03191600  | -2.01594200 | -0.28867400 |
| C               | 0.33381100  | -2.59562200 | 1.44020800  | C               | 1.09027100  | -2.75429600 | 1.05684300  |
| O               | 0.14396600  | 2.28198200  | 0.88451900  | O               | 0.11048700  | 2.42387600  | -0.39325100 |
| H               | 2.85465300  | -2.63780300 | 1.36795900  | H               | 2.95799800  | -3.01140000 | -0.73573600 |
| H               | 2.99606300  | -3.03253000 | -0.34067900 | H               | 2.25061700  | -2.15792800 | -2.11030500 |
| H               | 0.73250200  | -2.58361200 | -0.68422100 | H               | 0.22767200  | -2.42772500 | -0.90422700 |
| H               | -0.74421500 | -2.44826000 | 1.37122300  | H               | 0.19674500  | -2.57177300 | 1.65943700  |
| H               | 0.68786000  | -2.08399600 | 2.34052000  | H               | 1.95757600  | -2.41178100 | 1.62991300  |
| H               | 0.52758600  | -3.66606000 | 1.55915700  | H               | 1.18743800  | -3.83256200 | 0.89835400  |
| C               | 4.12396000  | 0.98673400  | -0.51602800 | C               | 4.13988500  | 0.96561000  | 0.83491000  |
| C               | 3.18444400  | -0.92926600 | 0.08720600  | C               | 3.06459400  | -0.84290000 | -0.60390900 |
| C               | 2.18343900  | 0.01596600  | -0.09650200 | C               | 2.14266700  | 0.03841200  | -0.05821600 |
| H               | 5.40970600  | -0.74807100 | -0.09626700 | H               | 5.28254200  | -0.64368000 | -0.86609900 |
| C               | 2.15296900  | 2.38614400  | -1.05119900 | C               | 2.33305400  | 2.21644700  | 1.25265900  |
| H               | 1.27443600  | 2.09489900  | -1.62957800 | H               | 2.02173900  | 3.08093000  | 0.66984200  |
| H               | 1.83189500  | 3.06605000  | -0.26555500 | H               | 1.47055600  | 1.85966700  | 1.81468400  |
| H               | 2.86908600  | 2.86723200  | -1.71973900 | H               | 3.12569300  | 2.48463400  | 1.95435600  |
| H               | 4.78856400  | 1.78351000  | -0.81978400 | H               | 4.86398200  | 1.71090800  | 0.40132300  |
| N               | -2.00516100 | 1.61240300  | 0.40338700  | N               | -2.05528000 | 1.67372000  | -0.20024000 |
| C               | -2.66473800 | 2.81762100  | 0.83204200  | C               | -2.70190900 | 2.93925500  | -0.42766500 |
| H               | -3.35216900 | 2.61294400  | 1.65967000  | H               | -3.35051800 | 3.20474200  | 0.41382900  |
| H               | -1.89125600 | 3.50911900  | 1.16773300  | H               | -1.91774800 | 3.68974300  | -0.53249800 |
| H               | -3.22670600 | 3.27202900  | 0.00892900  | H               | -3.30211600 | 2.91347700  | -1.34364900 |
| C               | -3.47173300 | -2.00960800 | -0.93065600 | C               | -3.57467900 | -2.14111900 | 0.23097100  |
| C               | -4.40431700 | -1.00828200 | -0.67502800 | C               | -4.49538700 | -1.10501900 | 0.11883700  |
| C               | -3.99652900 | 0.24608800  | -0.21818500 | C               | -4.06628400 | 0.21537500  | -0.02786800 |
| C               | -2.64149200 | 0.45150300  | -0.01526900 | C               | -2.70231800 | 0.45137800  | -0.06352800 |
| C               | -1.67892800 | -0.55391300 | -0.23979400 | C               | -1.74555800 | -0.58036400 | 0.03970000  |
| C               | -2.10971200 | -1.78596000 | -0.72292500 | C               | -2.20177100 | -1.88584900 | 0.19672900  |
| H               | -3.80435000 | -2.97513700 | -1.29723900 | H               | -3.92309700 | -3.16175700 | 0.34964400  |
| H               | -5.46016000 | -1.19847000 | -0.83830300 | H               | -5.55876500 | -1.31958900 | 0.14947500  |
| H               | -4.71743400 | 1.03525600  | -0.03194200 | H               | -4.77879900 | 1.02924100  | -0.11149700 |
| H               | -1.40080300 | -2.57779400 | -0.93791000 | H               | -1.51166800 | -2.71414600 | 0.29616700  |
| N               | 2.77808000  | 1.19658100  | -0.49817900 | N               | 2.81952100  | 1.14859200  | 0.39520600  |
| C               | 4.42151400  | -0.31626800 | -0.15072000 | C               | 4.33449500  | -0.25046200 | -0.53023600 |

② Two transition state geometries at ground state

| <i>EM-EP-TS-DDPYM</i> |             |             |             | <i>ZM-ZP-TS-DDPYM</i> |             |             |             |
|-----------------------|-------------|-------------|-------------|-----------------------|-------------|-------------|-------------|
| C                     | 0.91561300  | -0.54124200 | 0.07945700  | C                     | 0.83528000  | -0.47147900 | 0.00005000  |
| C                     | -0.45131400 | -0.42959900 | 0.14125600  | C                     | -0.41074400 | 0.09649900  | 0.03406800  |
| C                     | -1.31444800 | -1.66241100 | 0.00015600  | C                     | -0.71522300 | 1.54205500  | 0.18930200  |
| C                     | 2.94355900  | -1.80656200 | -0.58289800 | C                     | 2.40071500  | -2.38488900 | -0.29640400 |
| C                     | 1.56087800  | -1.94684700 | 0.08386800  | C                     | 0.94781500  | -2.00531500 | 0.06051900  |
| C                     | 1.67979200  | -2.45523000 | 1.52676400  | C                     | 0.58676300  | -2.50160400 | 1.46835600  |
| O                     | -1.04146300 | -2.85097500 | 0.08945000  | O                     | 0.02842300  | 2.48018300  | 0.43273600  |
| H                     | 3.70870700  | -2.40054400 | -0.07251600 | H                     | 2.81283100  | -3.11324000 | 0.41017800  |
| H                     | 2.91487800  | -2.14211300 | -1.62613400 | H                     | 2.46968500  | -2.83282600 | -1.29414000 |
| H                     | 0.93149600  | -2.64566600 | -0.46067700 | H                     | 0.26789500  | -2.43995700 | -0.67440200 |
| H                     | 0.69569100  | -2.52410800 | 1.99267600  | H                     | -0.40041100 | -2.16019500 | 1.78570300  |
| H                     | 2.31378200  | -1.78838800 | 2.12174800  | H                     | 1.32272600  | -2.12570400 | 2.18646200  |
| H                     | 2.12877700  | -3.45291100 | 1.53428300  | H                     | 0.60384500  | -3.59543700 | 1.50350200  |
| C                     | 3.75153800  | 1.78400000  | -0.40772100 | C                     | 4.28474900  | 0.77714200  | -0.30501400 |
| C                     | 3.18879300  | -0.34775500 | -0.48808500 | C                     | 3.09023900  | -1.07229000 | -0.24572200 |
| C                     | 2.06348400  | 0.35981700  | -0.07668400 | C                     | 2.21164700  | 0.00113400  | -0.08500800 |
| H                     | 5.25450300  | 0.31643800  | -1.04100700 | H                     | 5.30905100  | -1.15465000 | -0.52307400 |
| C                     | 1.76546900  | 2.87379300  | 0.48214200  | C                     | 2.65803500  | 2.57278700  | -0.04081800 |
| H                     | 2.51213000  | 3.65347000  | 0.63729100  | H                     | 1.94261500  | 2.85968400  | -0.80709400 |
| H                     | 1.02020600  | 3.24675200  | -0.22182400 | H                     | 2.22521100  | 2.80998300  | 0.92688300  |

|   |             |             |             |   |             |             |             |
|---|-------------|-------------|-------------|---|-------------|-------------|-------------|
| H | 1.30394300  | 2.66199700  | 1.44818200  | H | 3.58813100  | 3.12569100  | -0.18117900 |
| H | 4.24498700  | 2.74574300  | -0.41159400 | H | 5.05681900  | 1.53125000  | -0.36187400 |
| N | -2.59433400 | -1.22587100 | -0.29637300 | N | -2.08467800 | 1.68975800  | 0.06122200  |
| C | -3.70669000 | -2.12060800 | -0.48534900 | C | -2.75951700 | 2.95405900  | 0.19177800  |
| H | -4.17799100 | -1.95316300 | -1.45900000 | H | -3.46445200 | 2.93645500  | 1.02986600  |
| H | -3.31510100 | -3.13680300 | -0.43989900 | H | -1.99639800 | 3.71058700  | 0.37607800  |
| H | -4.45776500 | -1.98483000 | 0.30089200  | H | -3.30483800 | 3.20236100  | -0.72489700 |
| C | -2.51061300 | 2.84372900  | 0.29160100  | C | -3.55923800 | -2.12985800 | -0.38030200 |
| C | -3.72868500 | 2.29007200  | -0.08164600 | C | -4.48515400 | -1.09459600 | -0.38862900 |
| C | -3.83160800 | 0.91881400  | -0.31229400 | C | -4.06069700 | 0.22616000  | -0.24607200 |
| C | -2.68472900 | 0.15050100  | -0.19307300 | C | -2.70364000 | 0.46009100  | -0.10286400 |
| C | -1.41696400 | 0.68941800  | 0.11671600  | C | -1.73153300 | -0.56475500 | -0.09731800 |
| C | -1.36934500 | 2.04616100  | 0.40296700  | C | -2.19364800 | -1.87409100 | -0.23362100 |
| H | -2.44062900 | 3.90340700  | 0.51436200  | H | -3.89487400 | -3.15648500 | -0.48319600 |
| H | -4.61020300 | 2.91708600  | -0.16758600 | H | -5.54274000 | -1.30913500 | -0.50240000 |
| H | -4.78309800 | 0.46131700  | -0.56113900 | H | -4.77057300 | 1.04653400  | -0.24578000 |
| H | -0.46306700 | 2.49577300  | 0.75863600  | H | -1.52258000 | -2.72102800 | -0.21311700 |
| N | 2.43992700  | 1.69995700  | -0.02728100 | N | 2.98648800  | 1.15703800  | -0.13563300 |
| C | 4.25048500  | 0.53990300  | -0.71329600 | C | 4.39715000  | -0.59487200 | -0.38038800 |

### 13. Cartesian coordinates for $S_1/S_0$ conical intersections of DDIYM and DDPYM optimized with the CASSCF method

Unit of the Cartesian coordinate below is angstrom.

#### (1) Four different $S_1/S_0$ CIs for DDIYM

Four  $S_1/S_0$  conical intersections for molecular motor DDIYM were obtained from CASSCF(12,12)/6-31G(d) method implemented in MOLPRO<sup>S3,S4</sup> program. According to the characteristic dihedral angles C5-C2-C1-C3, the four CIs are named ECI(1), ECI(2), ZCI(1) and ZCI(2), respectively. The conical intersections of ECI(1) and ECI(2) for DDIYM are same as the geometries obtained by Pooler et al.<sup>S5</sup>.

| ECI(1)-DDIYM |             |             |             | ECI(2)-DDIYM |             |             |             |
|--------------|-------------|-------------|-------------|--------------|-------------|-------------|-------------|
| C            | 0.27004864  | 1.11525526  | -0.60342782 | C            | 0.83906308  | 1.51029141  | -1.28324206 |
| C            | 1.57301905  | 0.54790330  | -0.42213967 | C            | 1.50532508  | 0.43926516  | -0.59740732 |
| C            | 2.33435370  | -0.55995008 | -0.96606145 | C            | 2.36990107  | -0.67249570 | -0.93229268 |
| C            | 3.23609296  | -0.90733631 | 0.05631963  | C            | 3.18893661  | -0.83683981 | 0.19755152  |
| N            | 2.96532239  | -0.12733836 | 1.16527345  | N            | 2.89885755  | 0.16568087  | 1.10508777  |
| C            | 1.89249055  | 0.71946533  | 0.88469354  | C            | 1.91927755  | 0.99703470  | -0.57932246 |
| C            | -1.01010222 | 0.58708497  | -0.23996545 | C            | -0.57491351 | 1.74503197  | -1.33130696 |
| C            | -2.00350669 | 1.46624957  | -0.69961988 | C            | -0.80377783 | 3.03509147  | -1.83485170 |
| C            | -1.41985997 | 2.72561448  | -1.26085657 | C            | 0.48546634  | 3.71550821  | -2.18491122 |
| C            | 0.07478190  | 2.41814821  | -1.28946207 | C            | 1.52361152  | 2.60371779  | -2.02323296 |
| C            | 2.38898677  | -1.25631253 | -2.17060409 | C            | 2.51002732  | -1.55110804 | -2.00078585 |
| C            | 3.34708258  | -2.26131105 | -2.34178584 | C            | 3.45036949  | -2.57983115 | -1.92932095 |
| C            | 4.25469732  | -2.57069747 | -1.33232199 | C            | 4.24378927  | -2.74981353 | -0.79080181 |
| C            | 4.20455415  | -1.88213029 | -0.11815346 | C            | 4.11399241  | -1.88252165 | 0.28857722  |
| C            | -1.31412377 | -0.65375619 | 0.39514205  | C            | -1.62697751 | 0.89168032  | -0.89428246 |
| C            | -2.66480869 | -0.95786653 | 0.47855723  | C            | -2.90764237 | 1.41145073  | -1.03815428 |
| C            | -3.65673118 | -0.09456336 | -0.02225090 | C            | -3.13724958 | 2.69848756  | -1.55587552 |
| C            | -3.35292254 | 1.12082307  | -0.61190648 | C            | -2.10171012 | 3.52414252  | -1.96873349 |
| C            | 1.03055770  | 3.52599341  | -0.83672140 | C            | 2.93476922  | 2.99787113  | -1.61229723 |
| O            | 1.29142225  | 1.43921362  | 1.73865698  | O            | 1.52921141  | 2.09756181  | 1.06465758  |
| H            | 4.99268366  | -3.33849583 | -1.48312546 | H            | 4.95803380  | -3.55345294 | -0.75041099 |
| H            | -1.64239055 | 3.55878716  | -0.60387717 | H            | 0.68882229  | 4.50011847  | -1.46462001 |
| H            | -1.82443881 | 2.96143353  | -2.23842106 | H            | 0.46826092  | 4.16090051  | -3.17292874 |
| H            | 0.37579224  | 2.09116593  | -2.29420573 | H            | 1.58391682  | 2.04089370  | -2.97219163 |
| H            | 2.04945088  | 3.19410971  | -0.93685799 | H            | 3.59210286  | 2.14168390  | -1.63400303 |
| H            | 0.84933087  | 3.77204583  | 0.19962500  | H            | 2.91912267  | 3.40192305  | -0.61131035 |
| H            | 0.86418903  | 4.40294867  | -1.45332347 | H            | 3.31057955  | 3.74237052  | -2.30587220 |
| H            | 1.71459937  | -1.02222315 | -2.97902700 | H            | 1.89823422  | -1.45113231 | -2.88314544 |
| H            | 3.38636944  | -2.79587906 | -3.27606632 | H            | 3.56107030  | -3.25438423 | -2.76111859 |
| H            | 4.89911683  | -2.11447283 | 0.67062406  | H            | 4.72260006  | -2.00488768 | 1.16773631  |
| H            | -4.12378398 | 1.77417151  | -0.97486310 | H            | -2.29430348 | 4.50399499  | -2.36329658 |
| C            | 3.69716938  | -0.10491524 | 2.39832039  | C            | 3.52861936  | 0.38295792  | 2.37441308  |
| H            | 4.72826156  | 0.20478206  | 2.24769569  | H            | 4.60178484  | 0.52355017  | 2.26673482  |
| H            | 3.20760407  | 0.60190399  | 3.05215469  | H            | 3.09749931  | 1.27684897  | 2.80155570  |
| H            | 3.70303667  | -1.08197913 | 2.87437030  | H            | 3.35790663  | -0.45238753 | 3.04971930  |
| H            | -2.97008985 | -1.87431877 | 0.94740576  | H            | -3.75145077 | 0.81832671  | -0.73990779 |
| H            | -4.68670450 | -0.39086204 | 0.06954716  | H            | -4.15119189 | 3.04862017  | -1.62931514 |
| C            | -0.29330189 | -1.56473687 | 1.02066975  | C            | -1.43212877 | -0.48716052 | -0.31399895 |
| H            | 0.43545891  | -1.90726568 | 0.30207619  | H            | -0.84526916 | -1.11929906 | -0.96345477 |
| H            | 0.23099287  | -1.02709201 | 1.79823477  | H            | -0.90204982 | -0.42753953 | 0.62490169  |
| H            | -0.79443623 | -2.42125306 | 1.45441956  | H            | -2.39930006 | -0.94826780 | -0.15382711 |
| ZCI(1)-DDIYM |             |             |             | ZCI(2)-DDIYM |             |             |             |
| C            | -0.41096416 | -0.32778130 | -0.78221617 | C            | 0.81256116  | -0.03387378 | -0.86494103 |
| C            | -0.13150772 | 0.17106508  | 0.53387749  | C            | 0.71018439  | -0.20945828 | 0.55341807  |
| C            | -1.08693100 | 1.04090195  | 1.02178557  | C            | 0.33797143  | -1.48398290 | 0.89072340  |



|   |             |             |             |   |             |             |             |
|---|-------------|-------------|-------------|---|-------------|-------------|-------------|
| C | -1.53207975 | -1.52913444 | -2.54664314 | C | 1.84534669  | 0.18785539  | -3.03557810 |
| C | -1.54425068 | -1.17552487 | -1.06707672 | C | 2.08612303  | -0.12486231 | -1.56395471 |
| C | -2.04434946 | -2.19413410 | -0.05428022 | C | 3.35252137  | 0.39154340  | -0.89714154 |
| O | -2.03021907 | 1.60770796  | 0.42893484  | O | 0.32121609  | -2.52309862 | 0.18560299  |
| H | -1.30074429 | -2.58004566 | -2.68376950 | H | 2.31548591  | 1.12556914  | -3.31137371 |
| H | -2.47869083 | -1.33474522 | -3.03776981 | H | 2.22374106  | -0.57681117 | -3.70577244 |
| H | -2.13577416 | -0.21831386 | -0.91168634 | H | 2.01944523  | -1.23069929 | -1.38882459 |
| H | -2.01348138 | -1.78759657 | 0.94372811  | H | 3.36336538  | 0.10579506  | 0.14210858  |
| H | -1.43225533 | -3.08819468 | -0.08863963 | H | 3.40311573  | 1.47275485  | -0.97031003 |
| H | -3.06408236 | -2.47139098 | -0.29309011 | H | 4.22018268  | -0.01992061 | -1.39966413 |
| C | 1.00829205  | 0.38825525  | -4.65434587 | C | -1.80083892 | 0.50674898  | -4.04527490 |
| C | -0.43277308 | -0.65801058 | -3.08186169 | C | 0.35129400  | 0.28266771  | -3.11044724 |
| C | 0.19956013  | 0.05357017  | -2.04179060 | C | -0.23075434 | 0.08889469  | -1.84585193 |
| H | -0.52835482 | -1.01665099 | -5.20348875 | H | -0.00221665 | 0.63642161  | -5.20151375 |
| C | 2.02242514  | 1.75140361  | -1.24714376 | C | -2.31996398 | -0.26151469 | -0.34927323 |
| H | 2.01754187  | 2.79779129  | -1.53309848 | H | -2.04695805 | -1.26130003 | -0.03952472 |
| H | 1.59735935  | 1.64740964  | -0.26637839 | H | -2.02823234 | 0.42147859  | 0.43441151  |
| H | 3.05653239  | 1.42068079  | -1.22790908 | H | -3.39391228 | -0.21083442 | -0.48281963 |
| H | 1.34378003  | 0.53558954  | -5.66494987 | H | -2.44202436 | 0.67725966  | -4.89170442 |
| N | -0.87033152 | 1.13410078  | 2.39893873  | N | -0.11543006 | -1.44220290 | 2.21224047  |
| C | -1.62690437 | 1.99495114  | 3.26245963  | C | -0.44063180 | -2.61188243 | 2.97582059  |
| H | -0.98631145 | 2.71253201  | 3.76841835  | H | -1.46827407 | -2.58152241 | 3.32995703  |
| H | -2.34022923 | 2.52535430  | 2.65079611  | H | -0.31819040 | -3.46654820 | 2.32795561  |
| H | -2.16247100 | 1.42466261  | 4.01723555  | H | 0.21168766  | -2.72159765 | 3.83881254  |
| C | 2.05638425  | -1.68966513 | 3.07161958  | C | -0.09780274 | 2.60011467  | 3.05972555  |
| C | 1.59893580  | -0.99747383 | 4.18796246  | C | -0.51483576 | 1.76069860  | 4.08582640  |
| C | 0.61638514  | -0.01096078 | 4.04689204  | C | -0.53570493 | 0.37119075  | 3.89494945  |
| C | 0.10891875  | 0.24390293  | 2.78863457  | C | -0.14357568 | -0.13337112 | 2.66419689  |
| C | 0.57300779  | -0.43558416 | 1.64475925  | C | 0.31555247  | 0.70839568  | 1.61817222  |
| C | 1.55568500  | -1.41031389 | 1.79424531  | C | 0.32525051  | 2.08071145  | 1.82248563  |
| H | 2.81296221  | -2.44723966 | 3.18618274  | H | -0.08602631 | 3.66560477  | 3.21380323  |
| H | 1.99862371  | -1.21725117 | 5.16201296  | H | -0.82458996 | 2.17391059  | 5.02963915  |
| H | 0.25709345  | 0.52776066  | 4.90594835  | H | -0.86143917 | -0.28372419 | 4.68382087  |
| H | 1.94283973  | -1.94610020 | 0.94261300  | H | 0.66932803  | 2.75724631  | 1.05689393  |
| C | 1.26727291  | 0.95443738  | -2.28552428 | C | -1.63985566 | 0.05858880  | -1.65297781 |
| C | -0.04341446 | -0.48816919 | -4.40405814 | C | -0.43487777 | 0.49135840  | -4.22916830 |
| C | 1.64645122  | 1.08600417  | -3.62311427 | C | -2.39603204 | 0.29137769  | -2.79283011 |
| H | 2.45254520  | 1.75299407  | -3.86877981 | H | -3.46734482 | 0.28878639  | -2.72466184 |

## (2) Two different $S_1/S_0$ CIs for DDPYM

Two  $S_1/S_0$  conical intersections for molecular motor DDPYM were obtained from CASSCF(10,9)/6-31G(d) method implemented in MOLPRO<sup>S3,S4</sup> program. According to the characteristic dihedral angles C5-C2-C1-C3, the two CIs are named ECI and ZCI, respectively.

| ECI-DDPYM |             |             | ZCI-DDPYM   |   |             |             |             |
|-----------|-------------|-------------|-------------|---|-------------|-------------|-------------|
| C         | 0.27359461  | -0.52111587 | -1.01392826 | C | -0.55143699 | -0.22304712 | -1.02189681 |
| C         | 0.36119727  | -0.17462600 | 0.39066156  | C | -0.40484027 | 0.11383732  | 0.38023459  |
| C         | 1.45176384  | 0.58563363  | 0.96226813  | C | -0.88941688 | 1.35847804  | 0.93778145  |
| C         | 0.46441649  | -1.73127550 | -3.16269503 | C | -1.46054095 | -1.05976418 | -3.16360292 |
| C         | 0.82091975  | -1.80920761 | -1.64144756 | C | -1.78025787 | -0.89980109 | -1.64169737 |
| C         | 2.31794522  | -1.99892496 | -1.38137456 | C | -2.16606305 | -2.21334515 | -0.96044763 |
| O         | 2.42241285  | 1.06532662  | 0.41609799  | O | -1.43374588 | 2.28732592  | 0.37979042  |
| H         | 1.35867723  | -1.73979785 | -3.77754027 | H | -1.36999787 | -2.10709996 | -3.43609462 |
| H         | -0.14615096 | -2.57177478 | -3.47643395 | H | -2.23859243 | -0.63361014 | -3.78762294 |
| H         | 0.29227679  | -2.64408070 | -1.18655925 | H | -2.60330602 | -0.19974132 | -1.51881333 |
| H         | 2.52057160  | -2.05244628 | -0.31912758 | H | -2.35656213 | -2.06075249 | 0.09481302  |
| H         | 2.89093923  | -1.17246278 | -1.78638963 | H | -1.37655166 | -2.95277562 | -1.05876482 |
| H         | 2.66392529  | -2.92060745 | -1.84006573 | H | -3.06569742 | -2.62213227 | -1.41053618 |
| C         | -1.31500696 | 1.51667387  | -3.46398411 | C | 1.77814253  | 0.72090433  | -3.54387282 |
| C         | -0.26680233 | -0.42733508 | -3.28487314 | C | -0.15159194 | -0.34449032 | -3.32048817 |
| C         | -0.32330038 | 0.19886669  | -2.02824612 | C | 0.30132474  | 0.08584044  | -2.06176656 |
| H         | -1.04568029 | 0.24887208  | -5.24268694 | H | 0.76763713  | -0.09985259 | -5.31845736 |

|   |             |             |             |   |             |             |             |
|---|-------------|-------------|-------------|---|-------------|-------------|-------------|
| C | -1.19673787 | 2.39134775  | -1.12592322 | C | 2.26954631  | 1.41083529  | -1.19343191 |
| H | -1.73287381 | 3.22574432  | -1.55454549 | H | 2.52143125  | 0.71053698  | -0.41135924 |
| H | -1.77777195 | 1.96007821  | -0.32443511 | H | 3.17471177  | 1.79925363  | -1.63748532 |
| H | -0.24668906 | 2.72912845  | -0.73844618 | H | 1.69047542  | 2.22163176  | -0.77594613 |
| H | -1.83147226 | 2.38725285  | -3.81308754 | H | 2.66866772  | 1.18515659  | -3.91529931 |
| N | 1.17807798  | 0.70803113  | 2.31743439  | N | -0.59385490 | 1.32442471  | 2.29311436  |
| C | 2.03276663  | 1.39869133  | 3.24475874  | C | -0.92144925 | 2.38398477  | 3.20816104  |
| H | 2.38347308  | 0.72964411  | 4.02455458  | H | -0.02707732 | 2.79668271  | 3.66563052  |
| H | 2.88060180  | 1.77580744  | 2.69458600  | H | -1.42298339 | 3.15902674  | 2.65001119  |
| H | 1.51269618  | 2.23016075  | 3.71126302  | H | -1.57972660 | 2.02952835  | 3.99535709  |
| C | -2.43112744 | -1.27022163 | 2.73232575  | C | 1.31980210  | -2.31399531 | 2.75088804  |
| C | -1.88243030 | -0.71429422 | 3.88419683  | C | 1.17251316  | -1.53253616 | 3.89297023  |
| C | -0.65521305 | -0.02506657 | 3.83537780  | C | 0.53095713  | -0.28058954 | 3.82853999  |
| C | -0.01790310 | 0.08324155  | 2.63277555  | C | 0.05612152  | 0.14555961  | 2.62136704  |
| C | -0.55503098 | -0.47815239 | 1.43992381  | C | 0.18842798  | -0.63555990 | 1.43818200  |
| C | -1.77552398 | -1.15802489 | 1.50069863  | C | 0.83216163  | -1.87479629 | 1.51460095  |
| H | -3.36914266 | -1.79403972 | 2.78817954  | H | 1.81312270  | -3.26769981 | 2.81772044  |
| H | -2.39635209 | -0.80965360 | 4.82366283  | H | 1.55081062  | -1.88319082 | 4.83622420  |
| H | -0.23801067 | 0.40217413  | 4.72966105  | H | 0.42271431  | 0.31879907  | 4.71473330  |
| H | -2.20495706 | -1.59264925 | 0.61473581  | H | 0.95004597  | -2.48533730 | 0.63653634  |
| N | -0.97612909 | 1.39991662  | -2.16810051 | N | 1.49843813  | 0.73935286  | -2.22901834 |
| C | -0.89289313 | 0.39150736  | -4.19248026 | C | 0.77190809  | 0.04829527  | -4.25797441 |

## 14. References

- [S1] W. Thiel, MNDO program, version 6.1, Max-Planck-Institut für Kohlenforschung: Mulheim, 2007.
- [S2] M. J. Frisch, G. W. Trucks, H. B. Schlegel, G. E. Scuseria, M. A. Robb, J. R. Cheeseman, G. Scalmani, V. Barone, B. Mennucci, G. A. Petersson, H. Nakatsuji, M. Caricato, X. Li, H. P. Hratchian, A. F. Izmaylov, J. Bloino, G. Zheng, J. L. Sonnenberg, M. Hada, M. Ehara, K. Toyota, R. Fukuda, J. Hasegawa, M. Ishida, T. Nakajima, Y. Honda, O. Kitao, N. Nakai, T. Vreven, J. A. Montgomery Jr, J. E. Peralta, F. Ogliaro, M. Bearpark, J. J. Heyd, E. Brothers, K. N. Kudin, V. N. Staroverov, T. Keith, R. Kobayashi, J. Normand, K. Raghavachari, A. Rendell, J. C. Burant, S. S. Iyengar, J. Tomasi, M. Cossi, N. Rega, J. M. Millam, M. Klene, J. E. Knox, J. B. Cross, V. Bakken, C. Adamo, J. Jaramillo, R. Gomperts, R. E. Stratmann, O. Yazyev, A. J. Austin, R. Cammi, C. Pomelli, J. W. Ochterski, R. L. Martin, R. Morokuma, V. G. Zakrzewski, G. A. Voth, P. Salvador, J. J. Dannenberg, S. Dapprich, A. D. Daniels, O. Farkas, J. B. Foresman, J. V. Ortiz, J. Cioslowski, D. J. Fox, *Gaussian 09*, Revision D.01, Gaussian, Inc. Wallingford CT, 2009.
- [S3] H. -J. Werner, P. J. Knowles, G. Knizia, F. R. Manby and M. Schütz, *WIREs Comput. Mol. Sci.* 2012, 2, 242-253.
- [S4] MOLPRO, version 2019.1, a package of *ab initio* programs, H. -J. Werner, P. J. Knowles, G. Knizia, F. R. Manby, M. Schütz, P. Celani, W. Györffy, D. Kats, T. Korona, R. Lindh, A. Mitrushenkov, G. Rauhut, K. R. Shamasundar, T. B. Adler, R. D. Amos, S. J. Bennie, A. Bernhardsson, A. Berning, D. L. Cooper, M. J. O. Deegan, A. J. Dobbyn, F. Eckert, E. Goll, C. Hampel, A. Hesselmann, G. Hetzer, T. Hrenar, G. Jansen, C. Köppl, S. J. R. Lee, Y. Liu, A. W. Lloyd, Q. Ma, R. A. Mata, A. J. May, S. J. McNicholas, W. Meyer, T. F. Miller III, M. E. Mura, A. Nicklass, D. P. O'Neill, P. Palmieri, D. Peng, K. Pflüger, R. Pitzer, M. Reiher, T. Shiozaki, H. Stoll, A. J. Stone, R. Tarroni, T. Thorsteinsson, M. Wang, and M. Welborn.
- [S5] D. R. S. Pooler, R. Pierron, S. Crespi, R. Costil, L. Pfeifer, J. Leonard, M. Olivucci, B. L. Feringa, *Chem. Sci.* 2021, 12, 7486-7497.
